# Supplementary material for: Iodine(i)-based and iodine(iii)-based halogen bond catalysis on the Friedel–Crafts reaction: a theoretical study
Source: Royal Society of Chemistry journal article supplement (doi:10.1039/d3cp02541a), 2023-01-01
Supplement: d3cp02541a1.pdf [file d3cp02541a1.pdf]

## Supporting Information

Iodine(I)-based and Iodine(III)-based Halogen Bond Catalysis on the

Friedel-Crafts Reaction: A Theoretical Study

Chang Zhao, Ying Li, Xiaoyan Li, Yanli Zeng\*

*College of Chemistry and materials science, Hebei Normal University, Shijiazhuang,  
050024, China*

# 1. Structural Parameters

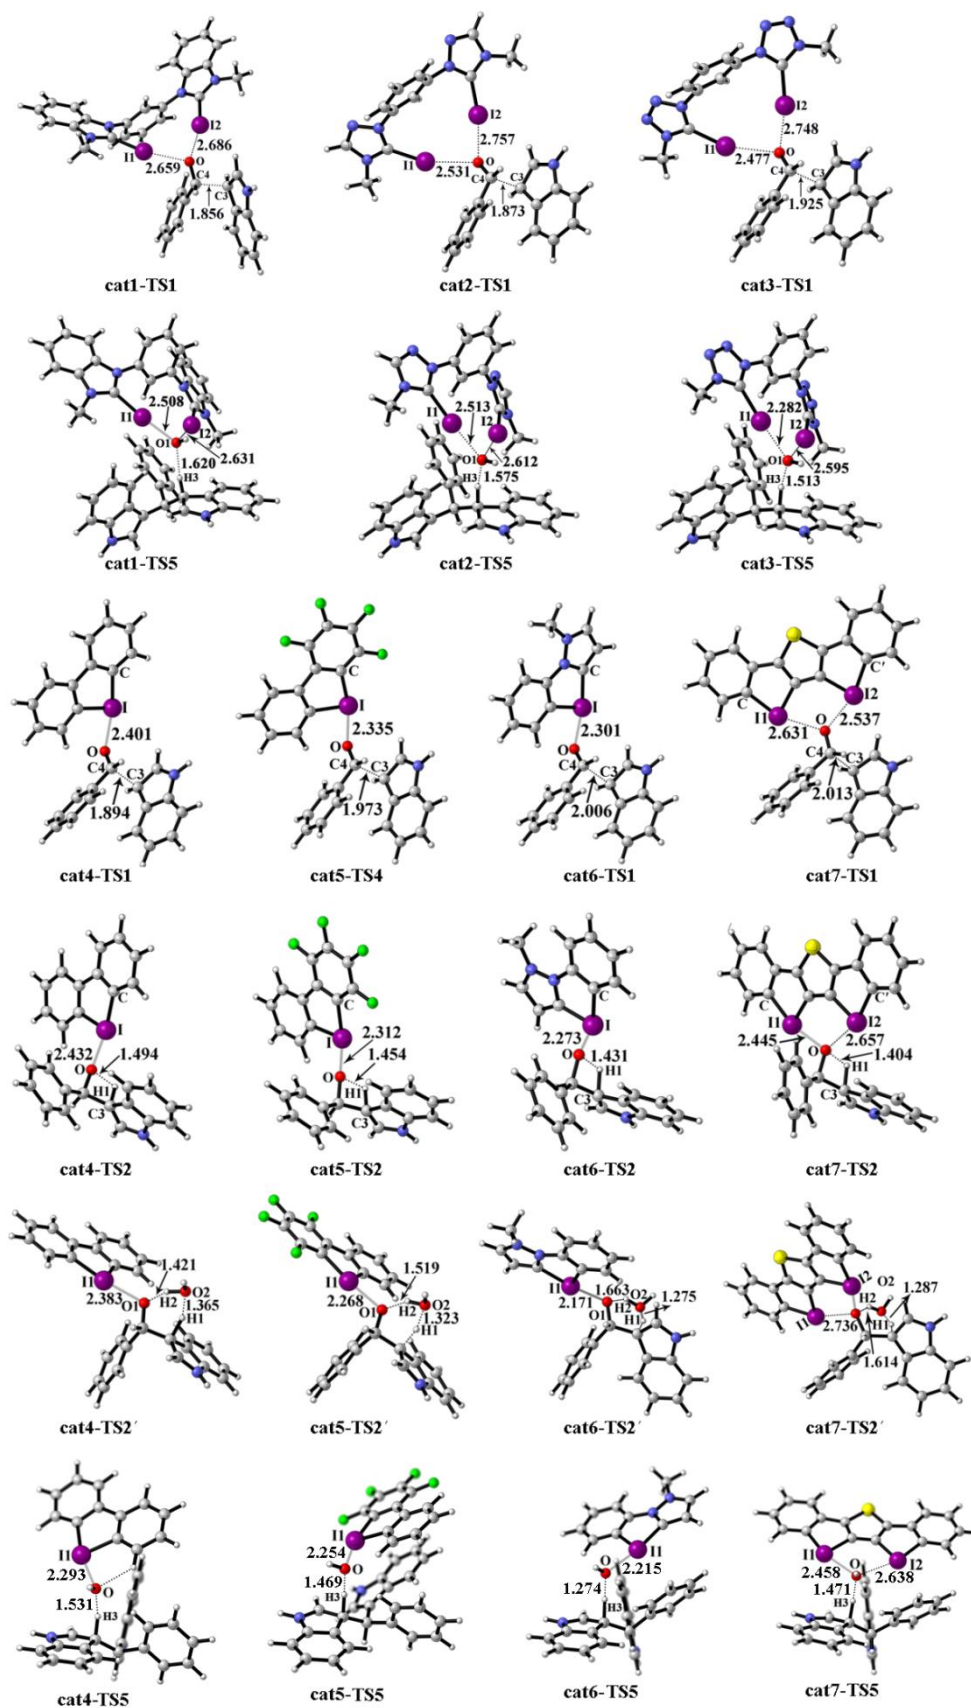

Figure S1. Geometric information of transition states. The bond lengths are in Å.

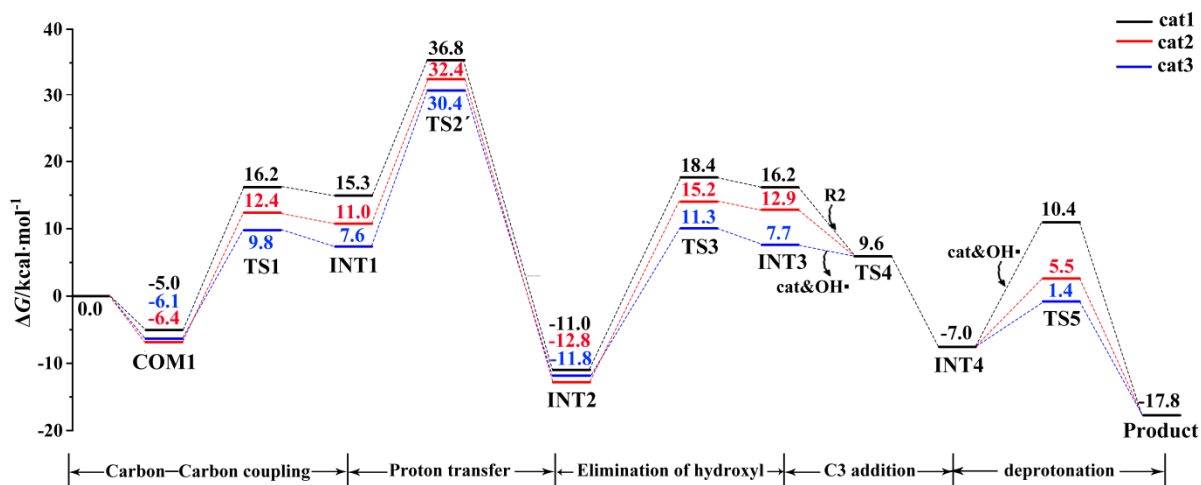

Figure S2. Gibbs free energy curves of water-assisted pathway catalyzed by iodine(I)-based halogen bond donors.

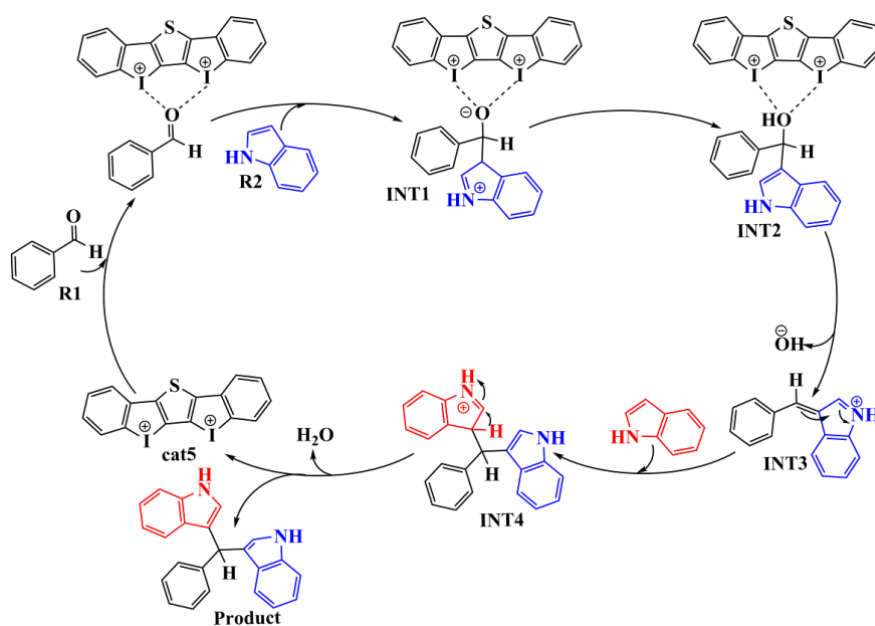

Scheme S1. Catalytic cycle for halogen bond catalyst catalyzed Friedel-Crafts reaction of benzaldehyde and indole.

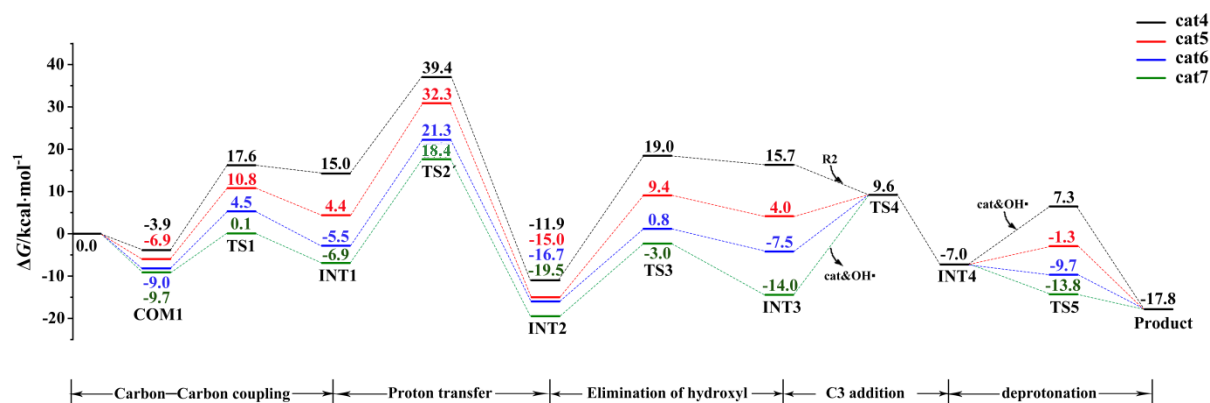

Figure S3. Gibbs free energy curves of water-assisted pathway catalyzed by iodine(III)-based halogen bond catalysts.

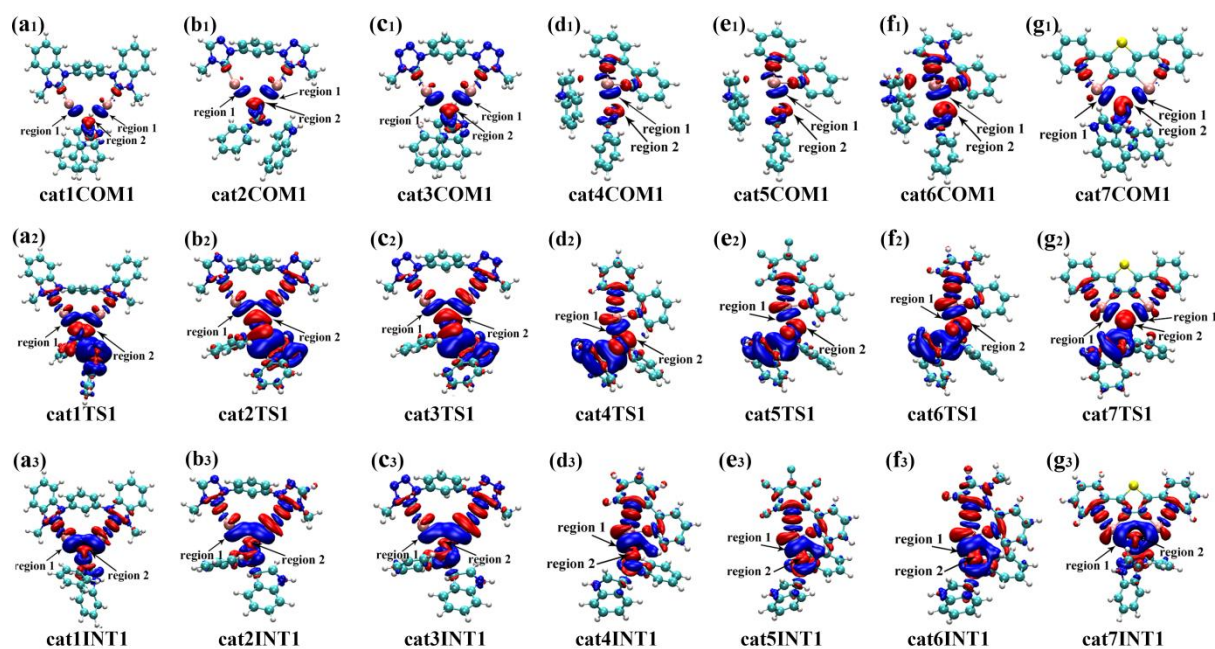

Figure S4. Plots of the computed density differences for COM1, TS1 and INT1. I, C, H, O, and N atoms are shown in pink, light blue, white, red, dark blue, respectively.

## 2. Energies and Cartesian Coordinates

### R1 (benzaldehyde)

Sum of electronic and thermal Free Energies =  
-345.44988 Hartree

Sum of electronic and thermal free energies + the entropy  
correction at 298.15K = -345.43896 Hartree

|   |             |             |            |
|---|-------------|-------------|------------|
| C | -0.27411100 | 2.02232900  | 0.00000000 |
| O | -1.38220500 | 2.50755800  | 0.00000000 |
| H | 0.62360400  | 2.66661900  | 0.00000000 |
| C | 0.00000000  | 0.56844200  | 0.00000000 |
| C | 1.32583100  | 0.13423000  | 0.00000000 |
| C | -1.04662600 | -0.35864900 | 0.00000000 |
| C | 1.60994500  | -1.22789400 | 0.00000000 |
| H | 2.12815400  | 0.86573800  | 0.00000000 |
| C | -0.76126300 | -1.71646200 | 0.00000000 |
| H | -2.07139400 | -0.00444600 | 0.00000000 |
| C | 0.56638200  | -2.14971500 | 0.00000000 |
| H | 2.63817000  | -1.56967500 | 0.00000000 |
| H | -1.56744400 | -2.44084300 | 0.00000000 |
| H | 0.78560000  | -3.21153500 | 0.00000000 |

### R2 (indole)

Sum of electronic and thermal Free Energies =  
-363.67484 Hartree

Sum of electronic and thermal free energies + the entropy  
correction at 298.15K = -363.66402 Hartree

|   |             |             |            |
|---|-------------|-------------|------------|
| C | 0.00000000  | 0.71254000  | 0.00000000 |
| C | 0.49662900  | -0.61555900 | 0.00000000 |
| C | -0.41906700 | -1.68183200 | 0.00000000 |
| C | -1.77361800 | -1.40212800 | 0.00000000 |
| C | -2.24411200 | -0.07271700 | 0.00000000 |
| C | -1.36962100 | 0.99898700  | 0.00000000 |
| C | 2.23689500  | 0.81181600  | 0.00000000 |
| C | 1.92993700  | -0.52143800 | 0.00000000 |
| H | -0.06592500 | -2.70745600 | 0.00000000 |
| H | -2.48971600 | -2.21591100 | 0.00000000 |
| H | -3.31205400 | 0.11288800  | 0.00000000 |
| H | -1.72613400 | 2.02267700  | 0.00000000 |
| H | 1.03989700  | 2.56317500  | 0.00000000 |
| H | 3.19759100  | 1.30369500  | 0.00000000 |
| H | 2.63596800  | -1.33739200 | 0.00000000 |
| N | 1.08258800  | 1.55433100  | 0.00000000 |

### cat1

Sum of electronic and thermal Free Energies =  
-1662.70715 Hartree

Sum of electronic and thermal free energies + the entropy  
correction at 298.15K = -1662.69719 Hartree

|   |             |             |             |
|---|-------------|-------------|-------------|
| C | -0.00007400 | 0.72438800  | 0.29825500  |
| C | -0.00007700 | 1.13004500  | 3.07192100  |
| C | 1.18495800  | 0.82029900  | 1.01376300  |
| C | -1.18510500 | 0.82020400  | 1.01377600  |
| C | -1.20592000 | 1.02501600  | 2.38734100  |
| C | 1.20576800  | 1.02514600  | 2.38732300  |
| H | -2.15463900 | 1.09745100  | 2.90627100  |
| H | 2.15448600  | 1.09767400  | 2.90624100  |
| C | 2.99137700  | -0.38331500 | -0.18787800 |
| N | 4.12586600  | -0.08889100 | -0.81864400 |
| C | -2.99130600 | -0.38353100 | -0.18804300 |
| N | -4.12586200 | -0.08921600 | -0.81874300 |
| I | 2.22822900  | -2.26679700 | 0.05475700  |
| I | -2.22780200 | -2.26688700 | 0.05441200  |
| C | 5.02276200  | -1.05307600 | -1.46060700 |
| H | 5.75084700  | -0.49954800 | -2.04699000 |
| H | 4.44547300  | -1.69631100 | -2.12285900 |
| H | 5.53106800  | -1.64132100 | -0.69721400 |
| C | -5.02267600 | -1.05342800 | -1.46077600 |
| H | -5.75030800 | -0.49994300 | -2.04776500 |
| H | -5.53150300 | -1.64126000 | -0.69741000 |
| H | -4.44521700 | -1.69705600 | -2.12249300 |
| H | -0.00007700 | 1.28764300  | 4.14279800  |
| C | 3.24745400  | 1.81139700  | -0.02214900 |
| C | 4.32912900  | 1.28817000  | -0.73164500 |
| C | -3.24777700 | 1.81111000  | -0.02197200 |
| C | -4.32937300 | 1.28779500  | -0.7315210  |
| N | 2.42743300  | 0.73216100  | 0.30070700  |
| N | -2.42757500 | 0.73196700  | 0.30072700  |
| C | 5.35058400  | 2.11014600  | -1.20796700 |
| C | 5.22635800  | 3.46237300  | -0.94128300 |
| H | 5.99671600  | 4.13905100  | -1.29013500 |
| C | 4.12942500  | 3.98525800  | -0.22908400 |
| H | 4.07972700  | 5.05175300  | -0.04703600 |
| C | 3.11576700  | 3.17176500  | 0.24469900  |
| C | -3.11632400 | 3.17146500  | 0.24506100  |
| C | -4.13013900 | 3.98484400  | -0.22858300 |
| H | -4.08062600 | 5.05132200  | -0.04638600 |
| C | -5.22699900 | 3.46186500  | -0.94082600 |
| H | -5.99748800 | 4.13845500  | -1.28955800 |
| C | -5.35099000 | 2.10965300  | -1.20769900 |

|                                                           |             |             |             |                                                           |             |                     |             |
|-----------------------------------------------------------|-------------|-------------|-------------|-----------------------------------------------------------|-------------|---------------------|-------------|
| H                                                         | 6.19652300  | 1.71268400  | -1.75360700 | Sum of electronic and thermal free energies + the entropy |             |                     |             |
| H                                                         | 2.26744100  | 3.55946400  | 0.79508500  | correction at 298.15K =                                   |             | -1419.60638 Hartree |             |
| H                                                         | -2.26805400 | 3.55923900  | 0.79548200  | C                                                         | -0.03566500 | 1.39856700          | -0.27448700 |
| H                                                         | -6.19686800 | 1.71210500  | -1.75337000 | C                                                         | 0.02345300  | 3.08172200          | 1.97714000  |
| H                                                         | -0.00008100 | 0.58612400  | -0.77795400 | C                                                         | 1.15540200  | 1.83841100          | 0.28095400  |
| <b>cat2</b>                                               |             |             |             | C                                                         | -1.19689000 | 1.82097400          | 0.35414300  |
| Sum of electronic and thermal Free Energies =             |             |             |             | C                                                         | -1.19484000 | 2.65177000          | 1.46586600  |
| -1387.61553 Hartree                                       |             |             |             | C                                                         | 1.21366700  | 2.67197400          | 1.38830800  |
| Sum of electronic and thermal free energies + the entropy |             |             |             | H                                                         | -2.13269200 | 2.95194500          | 1.91793100  |
| correction at 298.15K =                                   |             |             |             | H                                                         | 2.17450700  | 2.98744100          | 1.77734700  |
| -1387.60538 Hartree                                       |             |             |             | C                                                         | 2.96360000  | 0.22636600          | -0.36250400 |
| C                                                         | -0.04208400 | 1.39304500  | -0.27109300 | N                                                         | 4.09990500  | 0.41137800          | -1.02271600 |
| C                                                         | 0.00650500  | 3.08241900  | 1.97092000  | C                                                         | -2.99164300 | 0.19624000          | -0.31889000 |
| C                                                         | 1.15044100  | 1.83315500  | 0.28351900  | N                                                         | -4.18479600 | 0.40282600          | -0.86264800 |
| C                                                         | -1.21013300 | 1.81551900  | 0.34662000  | I                                                         | 2.27541300  | -1.50727500         | 0.45454600  |
| C                                                         | -1.20950500 | 2.65205400  | 1.45426200  | I                                                         | -2.19341600 | -1.59516400         | 0.23026700  |
| C                                                         | 1.19939500  | 2.67184700  | 1.38780100  | C                                                         | 5.14402400  | -0.56051900         | -1.35600500 |
| H                                                         | -2.14930500 | 2.95801200  | 1.89812100  | H                                                         | 5.91658200  | -0.01328600         | -1.88941700 |
| H                                                         | 2.15784400  | 2.99325100  | 1.77788700  | H                                                         | 4.71395900  | -1.33371600         | -1.99044200 |
| C                                                         | 2.94773800  | 0.23650900  | -0.36886400 | H                                                         | 5.54031700  | -0.97819300         | -0.43205800 |
| N                                                         | 4.10471700  | 0.37409400  | -1.02674500 | C                                                         | -5.21300400 | -0.57493100         | -1.22751200 |
| C                                                         | -2.98302400 | 0.19453700  | -0.32735200 | H                                                         | -6.01628000 | -0.01731000         | -1.70130000 |
| N                                                         | -4.19658000 | 0.33999300  | -0.87243200 | H                                                         | -5.56819700 | -1.06492600         | -0.32240700 |
| I                                                         | 2.22933700  | -1.48797200 | 0.45449400  | H                                                         | -4.78132700 | -1.29097000         | -1.92489600 |
| I                                                         | -2.13070000 | -1.57129900 | 0.24215300  | H                                                         | 0.04533100  | 3.73042000          | 2.84297500  |
| C                                                         | 5.08317500  | -0.68023700 | -1.31471700 | N                                                         | 2.39038500  | 1.43209300          | -0.33252800 |
| H                                                         | 5.88696200  | -0.23014200 | -1.89147100 | N                                                         | -2.46473400 | 1.41656800          | -0.18727700 |
| H                                                         | 4.60069800  | -1.46493000 | -1.89517100 | H                                                         | -0.05243800 | 0.78836300          | -1.17131100 |
| H                                                         | 5.47157200  | -1.07086600 | -0.37551900 | N                                                         | -3.34299400 | 2.33246400          | -0.63976900 |
| C                                                         | -5.14633800 | -0.72767700 | -1.20478300 | N                                                         | 3.18338500  | 2.31985600          | -0.96189100 |
| H                                                         | -6.03687100 | -0.25491600 | -1.61049500 | N                                                         | -4.37369700 | 1.71978500          | -1.04211000 |
| H                                                         | -5.39623600 | -1.27757400 | -0.29885900 | N                                                         | 4.20765200  | 1.70304000          | -1.37443100 |
| H                                                         | -4.69802000 | -1.38331100 | -1.94951200 | <b>cat4</b>                                               |             |                     |             |
| H                                                         | 0.02442900  | 3.73455800  | 2.83454300  | Sum of electronic and thermal Free Energies =             |             |                     |             |
| N                                                         | 2.38790000  | 1.44283600  | -0.33109300 | -759.29800 Hartree                                        |             |                     |             |
| N                                                         | -2.47544000 | 1.41839400  | -0.20137700 | Sum of electronic and thermal free energies + the entropy |             |                     |             |
| H                                                         | -0.05731900 | 0.78108400  | -1.16658100 | correction at 298.15K =                                   |             | -759.28745 Hartree  |             |
| C                                                         | -4.38164100 | 1.68103500  | -1.04859000 | C                                                         | -0.00753300 | 3.53398900          | -0.90401700 |
| H                                                         | -5.28033700 | 2.09869700  | -1.47480400 | C                                                         | -0.01644800 | 2.93472400          | -2.16347100 |
| C                                                         | 4.20310100  | 1.69454700  | -1.36005300 | C                                                         | -0.01538100 | 1.55353500          | -2.30201200 |
| H                                                         | 5.04243000  | 2.10179700  | -1.90212100 | C                                                         | -0.00348700 | 0.73279200          | -1.16954400 |
| N                                                         | -3.34761000 | 2.35670100  | -0.64556300 | C                                                         | 0.00000000  | 1.38650000          | 0.06380600  |
| N                                                         | 3.16995300  | 2.36443900  | -0.94483700 | C                                                         | -0.00100300 | 2.75471500          | 0.24932400  |
| <b>cat3</b>                                               |             |             |             | C                                                         | 0.00348700  | -0.73279200         | -1.16954400 |
| Sum of electronic and thermal Free Energies =             |             |             |             | C                                                         | 0.00000000  | -1.38650000         | 0.06380600  |
| -1419.61656 Hartree                                       |             |             |             |                                                           |             |                     |             |

|                                                           |             |             |             |                                                           |             |             |             |
|-----------------------------------------------------------|-------------|-------------|-------------|-----------------------------------------------------------|-------------|-------------|-------------|
| I                                                         | 0.00000000  | 0.00000000  | 1.63291700  | C                                                         | -0.61439300 | 3.41090900  | 0.00004000  |
| C                                                         | 0.01538100  | -1.55353500 | -2.30201200 | C                                                         | 0.48193400  | 2.55388700  | 0.00006500  |
| C                                                         | 0.01644800  | -2.93472400 | -2.16347100 | C                                                         | 0.25800200  | 1.18216800  | 0.00000700  |
| C                                                         | 0.00753300  | -3.53398900 | -0.90401700 | C                                                         | -1.06876400 | 0.74217200  | -0.00003300 |
| C                                                         | 0.00100300  | -2.75471500 | 0.24932400  | C                                                         | -2.17063200 | 1.56648000  | -0.00004900 |
| H                                                         | -0.00743400 | 4.61300300  | -0.81107600 | C                                                         | 0.84280800  | -1.16798500 | 0.00014000  |
| H                                                         | -0.02451100 | 3.55598100  | -3.05066800 | I                                                         | -1.19398200 | -1.35199800 | -0.00001100 |
| H                                                         | 0.02571700  | -1.10549400 | -3.28843300 | C                                                         | 1.93242100  | -1.99611400 | 0.00002300  |
| H                                                         | 0.02451100  | -3.55598100 | -3.05066800 | H                                                         | -2.75586700 | 3.62441800  | -0.00003800 |
| H                                                         | 0.00743400  | -4.61300300 | -0.81107600 | H                                                         | -0.43002400 | 4.47768100  | 0.00009000  |
| H                                                         | -0.00282000 | -3.20579800 | 1.23335400  | H                                                         | 1.96131500  | -3.07289300 | 0.00013800  |
| H                                                         | -0.02571700 | 1.10549400  | -3.28843300 | H                                                         | 1.47612600  | 2.97088000  | 0.00015100  |
| H                                                         | 0.00282000  | 3.20579800  | 1.23335400  | H                                                         | -3.18067500 | 1.17686600  | -0.00010200 |
| <b>cat5</b>                                               |             |             |             | N                                                         | 2.56646200  | 0.15105700  | -0.00004200 |
| Sum of electronic and thermal Free Energies =             |             |             |             | C                                                         | 3.39163000  | 1.36274300  | -0.00007700 |
| -1156.25211 Hartree                                       |             |             |             | H                                                         | 4.42095800  | 1.01317200  | -0.00015600 |
| Sum of electronic and thermal free energies + the entropy |             |             |             | H                                                         | 3.19216000  | 1.93437000  | -0.90469500 |
| correction at 298.15K =                                   |             |             |             | H                                                         | 3.19223900  | 1.93433800  | 0.90456800  |
| -1156.24163 Hartree                                       |             |             |             | C                                                         | 3.00824200  | -1.10722800 | -0.00003700 |
| C                                                         | 3.88044200  | 1.63312000  | -0.00004900 | H                                                         | 4.07093500  | -1.29990000 | -0.00012200 |
| C                                                         | 2.99657600  | 2.70899500  | -0.00002500 | N                                                         | 1.21744900  | 0.13424800  | 0.00009900  |
| C                                                         | 1.62112300  | 2.51572300  | -0.00000400 | <b>cat7</b>                                               |             |             |             |
| C                                                         | 1.09630500  | 1.21829800  | 0.00000200  | Sum of electronic and thermal Free Energies =             |             |             |             |
| C                                                         | 2.03195300  | 0.17820400  | -0.00002100 | -1607.21999 Hartree                                       |             |             |             |
| C                                                         | 3.40224300  | 0.32478200  | -0.00005700 | Sum of electronic and thermal free energies + the entropy |             |             |             |
| C                                                         | -0.31880000 | 0.83900700  | 0.00000200  | correction at 298.15K =                                   |             |             |             |
| C                                                         | -0.61228800 | -0.52741500 | -0.00003000 | -1607.20975 Hartree                                       |             |             |             |
| I                                                         | 1.08554200  | -1.69726400 | 0.00003300  | C                                                         | 0.00686600  | 2.67728800  | 1.34221100  |
| C                                                         | -1.42174000 | 1.68802700  | 0.00003300  | C                                                         | -0.00875500 | 3.43622400  | 0.16685800  |
| C                                                         | -2.71508900 | 1.18939200  | 0.00001800  | C                                                         | 0.00664800  | 4.81181600  | 0.10209800  |
| C                                                         | -2.95555200 | -0.17694300 | -0.00003500 | C                                                         | 0.04001900  | 5.47833000  | 1.32599200  |
| C                                                         | -1.88388300 | -1.05262300 | -0.00004700 | C                                                         | 0.05523300  | 4.77119500  | 2.52782300  |
| H                                                         | 4.95008700  | 1.80213400  | -0.00006000 | C                                                         | 0.03809000  | 3.38371300  | 2.54728600  |
| H                                                         | 3.38455100  | 3.72000200  | -0.00003400 | C                                                         | 0.00280800  | 1.23996500  | 1.16501200  |
| H                                                         | 0.95684000  | 3.36837700  | 0.00002600  | H                                                         | -0.00426700 | 5.35358000  | -0.83504500 |
| H                                                         | 4.07714900  | -0.52179900 | -0.00007300 | H                                                         | 0.05556200  | 6.56120100  | 1.33035100  |
| F                                                         | -1.27534100 | 3.00791900  | 0.00003600  | H                                                         | 0.08218100  | 5.31260700  | 3.46509000  |
| F                                                         | -3.73862500 | 2.02714200  | 0.00003200  | H                                                         | 0.05180700  | 2.84674900  | 3.48930600  |
| F                                                         | -4.19602600 | -0.63231800 | -0.00003500 | C                                                         | 0.00000000  | 0.70453600  | -0.09606300 |
| F                                                         | -2.08223900 | -2.36331300 | -0.00007100 | C                                                         | 0.00875500  | -3.43622400 | 0.16685800  |
| <b>cat6</b>                                               |             |             |             | C                                                         | -0.00686600 | -2.67728800 | 1.34221100  |
| Sum of electronic and thermal Free Energies =             |             |             |             | C                                                         | -0.03809000 | -3.38371300 | 2.54728600  |
| -792.93422 Hartree                                        |             |             |             | C                                                         | -0.05523300 | -4.77119500 | 2.52782300  |
| Sum of electronic and thermal free energies + the entropy |             |             |             | C                                                         | -0.04001900 | -5.47833000 | 1.32599200  |
| correction at 298.15K =                                   |             |             |             | C                                                         | -0.00664800 | -4.81181600 | 0.10209800  |
| -792.92369 Hartree                                        |             |             |             | C                                                         | -0.00664800 | -4.81181600 | 0.10209800  |
| C                                                         | -1.92016500 | 2.93626800  | -0.00002000 | C                                                         | 0.00000000  | -0.70453600 | -0.09606300 |

|   |             |             |             |
|---|-------------|-------------|-------------|
| C | -0.00280800 | -1.23996500 | 1.16501200  |
| H | -0.05180700 | -2.84674900 | 3.48930600  |
| H | -0.08218100 | -5.31260700 | 3.46509000  |
| H | -0.05556200 | -6.56120100 | 1.33035100  |
| H | 0.00426700  | -5.35358000 | -0.83504500 |
| S | 0.00000000  | 0.00000000  | 2.37007100  |
| I | 0.04564300  | -2.18352100 | -1.52636900 |
| I | -0.04564300 | 2.18352100  | -1.52636900 |

**Pre-complex (cat1)**

Sum of electronic and thermal Free Energies =  
-2008.15492 Hartree

Sum of electronic and thermal free energies + the entropy  
correction at 298.15K = -2008.14514 Hartree

|   |             |             |             |
|---|-------------|-------------|-------------|
| C | 2.70290900  | -3.39620000 | -1.33568100 |
| O | 1.84348200  | -2.56029600 | -1.56759800 |
| C | 3.16628400  | -3.75201700 | 0.01150000  |
| C | 4.19879000  | -4.68476800 | 0.13556100  |
| C | 2.59718800  | -3.17035600 | 1.15123400  |
| C | 4.66711900  | -5.03484400 | 1.39681100  |
| H | 4.62850400  | -5.12690200 | -0.75761300 |
| C | 3.06417800  | -3.52409600 | 2.40729200  |
| H | 1.79068600  | -2.45248300 | 1.04712200  |
| C | 4.09960600  | -4.45420200 | 2.52796600  |
| H | 5.46926900  | -5.75586200 | 1.49897700  |
| H | 2.62759700  | -3.08079900 | 3.29429500  |
| H | 4.46263200  | -4.72721100 | 3.51236900  |
| H | 3.18724300  | -3.93268600 | -2.16700600 |
| C | -1.16107900 | 1.42216700  | -0.11763100 |
| C | -2.07158200 | 2.56371800  | -2.50843900 |
| C | -2.32497700 | 0.97738800  | -0.73064000 |
| C | -0.44455900 | 2.42621400  | -0.75520500 |
| C | -0.88421500 | 3.00772200  | -1.93768000 |
| C | -2.79422400 | 1.53621000  | -1.91280700 |
| H | -0.29669700 | 3.79065800  | -2.40317800 |
| H | -3.70874600 | 1.16239000  | -2.35804100 |
| C | -2.70523200 | -1.37628600 | -0.03699500 |
| N | -3.65506100 | -2.08102800 | 0.57422200  |
| C | 1.93525400  | 2.19452900  | -0.08892800 |
| N | 2.86546000  | 2.93073400  | 0.51497700  |
| I | -0.92952700 | -2.12385600 | -0.74762300 |
| I | 2.19347500  | 0.28865700  | -0.80843300 |
| C | -3.60014500 | -3.51829700 | 0.84989600  |
| H | -4.51272300 | -3.79843100 | 1.36873400  |
| H | -2.74119000 | -3.73291300 | 1.48436000  |
| H | -3.53129700 | -4.06623500 | -0.08881300 |

|   |             |             |             |
|---|-------------|-------------|-------------|
| C | 4.24835100  | 2.52264200  | 0.76802500  |
| H | 4.67770900  | 3.21479300  | 1.48696300  |
| H | 4.81522000  | 2.55232800  | -0.16202800 |
| H | 4.25487400  | 1.51929100  | 1.19013300  |
| H | -2.42503400 | 3.00715700  | -3.43046100 |
| C | -4.33554100 | 0.04835900  | 0.45395500  |
| C | -4.70418600 | -1.22206600 | 0.89845600  |
| C | 0.98622500  | 4.14225800  | 0.39524600  |
| C | 2.31199400  | 4.17090400  | 0.82947800  |
| N | -3.07401700 | -0.08580400 | -0.12318600 |
| N | 0.78404400  | 2.88496300  | -0.17200000 |
| C | -5.92538000 | -1.44339000 | 1.53446600  |
| C | -6.74278200 | -0.33856100 | 1.69868500  |
| H | -7.70164200 | -0.46307300 | 2.18667700  |
| C | -6.36441300 | 0.94194400  | 1.25148000  |
| H | -7.03976700 | 1.77445000  | 1.40587800  |
| C | -5.15298000 | 1.16331000  | 0.62021000  |
| C | 0.12375600  | 5.22257800  | 0.56320800  |
| C | 0.65864100  | 6.33851100  | 1.18259200  |
| H | 0.03176600  | 7.20818000  | 1.33670900  |
| C | 1.99760700  | 6.37432100  | 1.61692500  |
| H | 2.37162100  | 7.27197000  | 2.09371500  |
| C | 2.85030600  | 5.29653000  | 1.45215000  |
| H | -6.22033000 | -2.42546900 | 1.88030800  |
| H | -4.85044600 | 2.14282500  | 0.27077200  |
| H | -0.90393800 | 5.18409500  | 0.22437900  |
| H | 3.87938700  | 5.32860400  | 1.78597800  |
| H | -0.82629800 | 1.00584500  | 0.82664600  |

**Pre-complex (cat2)**

Sum of electronic and thermal Free Energies =  
-1733.064411 Hartree

Sum of electronic and thermal free energies + the entropy  
correction at 298.15K = -1733.05448 Hartree

|   |             |             |             |
|---|-------------|-------------|-------------|
| C | -3.11698600 | -1.57992200 | -1.53825500 |
| O | -1.95966700 | -1.20764800 | -1.41408900 |
| C | -4.12161200 | -1.50451500 | -0.47219600 |
| C | -5.45044800 | -1.80139000 | -0.78487900 |
| C | -3.76324800 | -1.14087600 | 0.83191600  |
| C | -6.42715500 | -1.71563400 | 0.20072900  |
| H | -5.70954400 | -2.09074700 | -1.79825000 |
| C | -4.73875900 | -1.06421100 | 1.81329500  |
| H | -2.72379900 | -0.94135600 | 1.06925600  |
| C | -6.06953800 | -1.34634100 | 1.49477600  |
| H | -7.46068600 | -1.93755100 | -0.03606000 |
| H | -4.47094300 | -0.78995600 | 2.82667600  |



|                                                           |             |             |             |                                                           |             |             |             |
|-----------------------------------------------------------|-------------|-------------|-------------|-----------------------------------------------------------|-------------|-------------|-------------|
| H                                                         | -6.82979800 | -1.28233200 | 2.26506800  | H                                                         | 6.00453600  | -0.93851400 | 1.54962600  |
| H                                                         | -3.45959800 | -1.99625100 | -2.49818000 | C                                                         | 4.46432900  | -0.49494200 | -1.98142800 |
| C                                                         | 2.31334800  | 0.98789800  | 0.46101300  | H                                                         | 2.56971000  | -0.38479300 | -0.97614200 |
| C                                                         | 4.15807400  | 1.83738800  | -1.47324300 | C                                                         | 5.84480200  | -0.64841700 | -1.82933100 |
| C                                                         | 2.25552400  | 2.26196200  | -0.08687900 | H                                                         | 7.47804600  | -0.92908000 | -0.45721400 |
| C                                                         | 3.30051200  | 0.14046900  | -0.02142700 | H                                                         | 4.03814000  | -0.37726200 | -2.97057000 |
| C                                                         | 4.22655400  | 0.54214300  | -0.97443700 | H                                                         | 6.48333000  | -0.64615300 | -2.70556200 |
| C                                                         | 3.16203400  | 2.70448400  | -1.04028500 | H                                                         | 3.89856200  | -0.84388300 | 2.56236300  |
| H                                                         | 4.98263100  | -0.15354500 | -1.31832300 | C                                                         | -2.40532500 | 0.41197400  | -0.57185300 |
| H                                                         | 3.08144100  | 3.70985400  | -1.43609400 | C                                                         | -4.58989600 | 0.79714200  | 1.15309100  |
| C                                                         | -0.08887400 | 3.02470000  | 0.26730200  | C                                                         | -2.74389800 | 1.66799100  | -0.09113100 |
| N                                                         | -0.62045200 | 4.14620900  | 0.76809500  | C                                                         | -3.17609200 | -0.64861700 | -0.11953300 |
| C                                                         | 2.49212100  | -2.17864100 | 0.40396800  | C                                                         | -4.26207700 | -0.48459900 | 0.72873300  |
| N                                                         | 3.05076900  | -3.24903900 | 0.98162900  | C                                                         | -3.82031300 | 1.88425800  | 0.75799900  |
| I                                                         | -1.10353800 | 1.41313900  | -0.49369200 | H                                                         | -4.83067700 | -1.34799500 | 1.05351900  |
| I                                                         | 0.63485000  | -2.07540800 | -0.45673800 | H                                                         | -4.04181700 | 2.88623800  | 1.10574500  |
| C                                                         | -2.04872800 | 4.45433200  | 0.89533200  | C                                                         | -0.65124400 | 3.03650200  | -0.27920100 |
| H                                                         | -2.13092200 | 5.44401900  | 1.33698800  | N                                                         | -0.45235600 | 4.24675700  | -0.78687200 |
| H                                                         | -2.51603200 | 3.71502500  | 1.54417800  | C                                                         | -1.71982900 | -2.67793300 | -0.33017400 |
| H                                                         | -2.50428200 | 4.44802600  | -0.09355600 | N                                                         | -1.95636900 | -3.85921300 | -0.88685800 |
| C                                                         | 2.44822300  | -4.57719300 | 1.13235400  | I                                                         | 0.70580500  | 1.79279600  | 0.61831500  |
| H                                                         | 3.17459100  | -5.20789900 | 1.63857200  | I                                                         | -0.02397500 | -2.04741500 | 0.62523700  |
| H                                                         | 2.22483300  | -4.98175100 | 0.14627300  | C                                                         | 0.78467300  | 5.02900900  | -0.84324000 |
| H                                                         | 1.54310100  | -4.49123900 | 1.73158800  | H                                                         | 0.55533000  | 5.93338100  | -1.40071500 |
| H                                                         | 4.87223500  | 2.16648700  | -2.21688300 | H                                                         | 1.54394800  | 4.44502100  | -1.36023700 |
| N                                                         | 1.23375600  | 3.16842700  | 0.35245600  | H                                                         | 1.09288400  | 5.27162500  | 0.17233100  |
| N                                                         | 3.39047800  | -1.19726400 | 0.49080000  | C                                                         | -1.07996100 | -5.03021500 | -0.95404200 |
| H                                                         | 1.64046600  | 0.68093200  | 1.25404400  | H                                                         | -1.62286400 | -5.79539400 | -1.50210600 |
| C                                                         | 4.29543800  | -2.86638300 | 1.39176200  | H                                                         | -0.86603100 | -5.36392700 | 0.06008200  |
| H                                                         | 4.97962100  | -3.53342500 | 1.89271400  | H                                                         | -0.16871400 | -4.75416400 | -1.48197400 |
| C                                                         | 0.42592300  | 4.94618700  | 1.12937900  | H                                                         | -5.43288700 | 0.94640500  | 1.81490100  |
| H                                                         | 0.29451200  | 5.92449600  | 1.56495600  | N                                                         | -1.95265200 | 2.80116800  | -0.48270100 |
| N                                                         | 4.52562500  | -1.62157600 | 1.10030300  | N                                                         | -2.84110700 | -1.98008800 | -0.54268300 |
| N                                                         | 1.56491100  | 4.37209000  | 0.88260200  | H                                                         | -1.60359800 | 0.26876700  | -1.28828200 |
| <b>Pre-complex (cat3)</b>                                 |             |             |             | N                                                         | -3.72856300 | -2.74570100 | -1.20669300 |
| Sum of electronic and thermal Free Energies =             |             |             |             | N                                                         | -2.51309100 | 3.86507500  | -1.08966300 |
| -1765.06511 Hartree                                       |             |             |             | N                                                         | -3.19329700 | -3.87327400 | -1.41115300 |
| Sum of electronic and thermal free energies + the entropy |             |             |             | N                                                         | -1.60896200 | 4.73041300  | -1.27057400 |
| correction at 298.15K =                                   |             |             |             | <b>Pre-complex (cat4)</b>                                 |             |             |             |
| -1765.05514 Hartree                                       |             |             |             | Sum of electronic and thermal Free Energies =             |             |             |             |
| C                                                         | 3.37432900  | -0.65437500 | 1.61339300  | -1104.742864 Hartree                                      |             |             |             |
| O                                                         | 2.16505800  | -0.45959900 | 1.61751800  | Sum of electronic and thermal free energies + the entropy |             |             |             |
| C                                                         | 4.20580500  | -0.65313200 | 0.40779900  | correction at 298.15K =                                   |             |             |             |
| C                                                         | 5.58623900  | -0.81341800 | 0.55605300  | -1104.73266 Hartree                                       |             |             |             |
| C                                                         | 3.64302600  | -0.49570900 | -0.86548500 | C                                                         | -4.76925400 | -1.21737500 | 1.19903100  |
| C                                                         | 6.40700800  | -0.80795300 | -0.56560900 | C                                                         | -5.03183000 | 0.15245300  | 1.23468900  |

|                                                           |             |             |             |                                                           |             |             |             |
|-----------------------------------------------------------|-------------|-------------|-------------|-----------------------------------------------------------|-------------|-------------|-------------|
| C                                                         | -4.08966900 | 1.07368200  | 0.79862600  | C                                                         | 0.08597500  | 1.31181800  | -0.67873700 |
| C                                                         | -2.85399700 | 0.63503600  | 0.31255900  | I                                                         | 0.14361300  | -0.77623100 | -0.89990700 |
| C                                                         | -2.63493900 | -0.74403100 | 0.29494200  | C                                                         | -1.29212800 | 3.11971400  | 0.02081900  |
| C                                                         | -3.54988100 | -1.68949700 | 0.72362900  | C                                                         | -0.25092400 | 3.98172000  | -0.29773400 |
| C                                                         | -1.77320100 | 1.49531800  | -0.17984900 | C                                                         | 0.95096000  | 3.50263100  | -0.81092400 |
| C                                                         | -0.59893000 | 0.88336400  | -0.62585800 | C                                                         | 1.13843400  | 2.13739000  | -1.01386700 |
| I                                                         | -0.73576700 | -1.19906300 | -0.43670100 | H                                                         | -2.21766200 | 3.51650400  | 0.41305800  |
| C                                                         | -1.81295200 | 2.89174600  | -0.25149400 | H                                                         | -0.38328500 | 5.04575000  | -0.14505300 |
| C                                                         | -0.72585100 | 3.59866800  | -0.74568000 | H                                                         | 1.75334100  | 4.18584700  | -1.06016600 |
| C                                                         | 0.42123000  | 2.93821800  | -1.18425400 | H                                                         | 2.06532500  | 1.75103600  | -1.41555900 |
| C                                                         | 0.50070700  | 1.54952300  | -1.13165700 | C                                                         | 3.81901700  | -0.71975900 | -1.34624600 |
| H                                                         | -5.51355200 | -1.92502800 | 1.54314800  | O                                                         | 2.67226800  | -0.48401600 | -1.69816600 |
| H                                                         | -5.98524900 | 0.50501700  | 1.60886600  | H                                                         | 4.53733900  | -1.10984700 | -2.08305600 |
| H                                                         | -2.69914800 | 3.41978500  | 0.07984900  | C                                                         | 4.33944200  | -0.52720000 | 0.01015100  |
| H                                                         | -0.77299400 | 4.67975000  | -0.79381500 | C                                                         | 5.64864600  | -0.94078800 | 0.27217000  |
| H                                                         | 1.26191500  | 3.49964400  | -1.57306400 | C                                                         | 3.56468900  | 0.04917500  | 1.02448000  |
| H                                                         | 1.38227000  | 1.02511900  | -1.47440700 | C                                                         | 6.18010400  | -0.79265200 | 1.54765100  |
| H                                                         | -4.30926300 | 2.13404400  | 0.83502000  | H                                                         | 6.23850400  | -1.37954000 | -0.52612100 |
| H                                                         | -3.33544100 | -2.75055200 | 0.69434100  | C                                                         | 4.09943200  | 0.19944200  | 2.29404800  |
| C                                                         | 3.09058100  | -1.26665900 | -1.22002400 | H                                                         | 2.55656500  | 0.39003500  | 0.81908000  |
| O                                                         | 1.88257600  | -1.32422100 | -1.37047400 | C                                                         | 5.40469400  | -0.22417700 | 2.55453800  |
| H                                                         | 3.75519500  | -1.74407100 | -1.95756800 | H                                                         | 7.19277400  | -1.11581400 | 1.75621600  |
| C                                                         | 3.76439400  | -0.58545000 | -0.10577000 | H                                                         | 3.50710300  | 0.64744200  | 3.08274800  |
| C                                                         | 5.16017100  | -0.52723100 | -0.11505500 | H                                                         | 5.81754100  | -0.10548500 | 3.54989700  |
| C                                                         | 3.04053600  | -0.00135600 | 0.94033900  | F                                                         | -3.88427500 | 2.09870800  | 0.94164700  |
| C                                                         | 5.83365300  | 0.11993200  | 0.91472300  | F                                                         | -5.48901200 | 0.02317600  | 1.32906400  |
| H                                                         | 5.70820400  | -0.98802200 | -0.93063900 | F                                                         | -4.70341700 | -2.49179700 | 0.74269500  |
| C                                                         | 3.71486300  | 0.63914600  | 1.96813200  | F                                                         | -2.20551200 | -2.92359000 | -0.26519200 |
| H                                                         | 1.95794100  | -0.05915900 | 0.95122900  | <b>Pre-complex (cat6)</b>                                 |             |             |             |
| C                                                         | 5.11017400  | 0.70155800  | 1.95227300  | Sum of electronic and thermal Free Energies =             |             |             |             |
| H                                                         | 6.91583000  | 0.17006100  | 0.91013400  | -1138.38614 Hartree                                       |             |             |             |
| H                                                         | 3.16110000  | 1.09024800  | 2.78278200  | Sum of electronic and thermal free energies + the entropy |             |             |             |
| H                                                         | 5.63342300  | 1.20502200  | 2.75724400  | correction at 298.15K = -1138.37599 Hartree               |             |             |             |
| <b>Pre-complex (cat5)</b>                                 |             |             |             | C                                                         | -2.88257300 | -0.92388400 | -0.12544700 |
| Sum of electronic and thermal Free Energies =             |             |             |             | O                                                         | -1.86750500 | -0.26102800 | 0.06020000  |
| -1501.70177 Hartree                                       |             |             |             | H                                                         | -2.81065800 | -1.99638500 | -0.36247700 |
| Sum of electronic and thermal free energies + the entropy |             |             |             | C                                                         | -4.22874000 | -0.36573900 | -0.05129600 |
| correction at 298.15K = -1501.69161 Hartree               |             |             |             | C                                                         | -5.31284600 | -1.21642800 | -0.28457500 |
| C                                                         | -3.87864500 | -1.47807700 | 0.53593400  | C                                                         | -4.43281700 | 0.98830000  | 0.24493300  |
| C                                                         | -4.27755300 | -0.18436900 | 0.83591200  | C                                                         | -6.60689000 | -0.71361000 | -0.22367900 |
| C                                                         | -3.42789900 | 0.89021100  | 0.62647400  | H                                                         | -5.13328300 | -2.26238100 | -0.51081900 |
| C                                                         | -2.14896300 | 0.70791300  | 0.10859500  | C                                                         | -5.72480100 | 1.48368900  | 0.30399800  |
| C                                                         | -1.78485100 | -0.61070100 | -0.17994500 | H                                                         | -3.57979100 | 1.63253100  | 0.42670900  |
| C                                                         | -2.61141000 | -1.69137200 | 0.02319600  | C                                                         | -6.80848000 | 0.63268200  | 0.06901400  |
| C                                                         | -1.14522100 | 1.74040800  | -0.16727400 | H                                                         | -7.45340100 | -1.36503200 | -0.40347000 |

|   |             |             |             |   |             |             |             |
|---|-------------|-------------|-------------|---|-------------|-------------|-------------|
| H | -5.89714300 | 2.52874000  | 0.53169700  | C | 0.67842600  | -0.86679200 | -0.18111700 |
| H | -7.81756900 | 1.02619800  | 0.11623200  | C | 1.18463000  | -2.00266600 | 0.39631200  |
| C | 4.83356500  | -1.95963000 | 0.04770300  | S | -0.07728000 | -3.04331700 | 0.95377400  |
| C | 5.34020400  | -0.66606600 | -0.00152400 | I | 2.19644700  | 0.32437200  | -0.89214000 |
| C | 4.50737400  | 0.44813100  | -0.03369300 | I | -2.19598000 | 0.43914200  | -0.86381100 |
| C | 3.13207800  | 0.24656500  | -0.01548800 | C | 0.10956200  | 3.79849000  | 0.15557300  |
| C | 2.64123400  | -1.06098900 | 0.03143400  | C | 0.15238900  | 5.19424800  | 0.25104100  |
| C | 3.45876100  | -2.17314900 | 0.06417900  | C | 0.10186700  | 3.00680100  | 1.31405400  |
| C | 0.79392500  | 0.88940200  | -0.02392500 | C | 0.18838900  | 5.79910700  | 1.50042800  |
| I | 0.55073100  | -1.13806600 | 0.04433900  | H | 0.15652300  | 5.79062000  | -0.65534900 |
| C | -0.00324500 | 2.00575800  | -0.05629700 | C | 0.13765900  | 3.61543000  | 2.55693800  |
| H | 5.50383800  | -2.80948300 | 0.07245400  | H | 0.06650500  | 1.92457200  | 1.24274300  |
| H | 6.41105600  | -0.50700300 | -0.01526900 | C | 0.18128700  | 5.00941300  | 2.64748400  |
| H | -1.07737700 | 2.06197600  | -0.05311100 | H | 0.22163000  | 6.87851300  | 1.58251000  |
| H | 4.94906500  | 1.43073500  | -0.07068300 | H | 0.13175900  | 3.01355200  | 3.45742400  |
| H | 3.05045200  | -3.17566800 | 0.10152700  | H | 0.20905300  | 5.48027600  | 3.62352800  |
| N | 2.15821300  | 2.58101100  | -0.07977500 | H | 0.08393500  | 3.89867000  | -2.02430600 |
| C | 3.38894500  | 3.37488600  | -0.09184000 | H | 2.71884000  | -4.10730300 | 1.48811300  |
| H | 3.06723600  | 4.41332000  | -0.10797100 | H | 6.48979700  | -2.38725800 | 0.36244700  |
| H | 3.95612200  | 3.17640800  | 0.81581200  | H | 5.34685200  | -0.43668300 | -0.65055900 |
| H | 3.95758900  | 3.14941400  | -0.99194800 | H | -2.91756700 | -3.98882200 | 1.47178500  |
| C | 0.91148500  | 3.05625400  | -0.09077000 | H | -6.60677800 | -2.09069800 | 0.36054700  |
| H | 0.74732100  | 4.12300400  | -0.12059000 | H | -5.37664900 | -0.18065000 | -0.62842300 |
| N | 2.10389600  | 1.23360400  | -0.03965700 | H | -5.38301400 | -3.97092600 | 1.40015000  |
|   |             |             |             | H | 5.18266900  | -4.19956400 | 1.42157700  |

**Pre-complex (cat7)**

Sum of electronic and thermal Free Energies =  
-1952.67414 Hartree

Sum of electronic and thermal free energies + the entropy  
correction at 298.15K = -1952.66413 Hartree

|   |             |             |             |
|---|-------------|-------------|-------------|
| C | 0.07477900  | 3.20423600  | -1.17276300 |
| O | 0.03727300  | 1.99042500  | -1.38766100 |
| C | -2.72989300 | -2.09397000 | 0.45944300  |
| C | -3.46377700 | -1.05106600 | -0.11696000 |
| C | -4.84250300 | -1.00553700 | -0.17349600 |
| C | -5.52405000 | -2.08398500 | 0.38547000  |
| C | -4.83103900 | -3.14403300 | 0.97093400  |
| C | -3.44427500 | -3.15898800 | 1.01340900  |
| C | -1.29002700 | -1.94403600 | 0.40046700  |
| C | -0.73277800 | -0.83271200 | -0.17755300 |
| C | 3.39631400  | -1.21655300 | -0.13495500 |
| C | 2.61624400  | -2.21909300 | 0.45227000  |
| C | 3.28244500  | -3.30780800 | 1.02001600  |
| C | 4.66852600  | -3.35479400 | 0.98037500  |
| C | 5.40837000  | -2.33324300 | 0.38407800  |
| C | 4.77578600  | -1.23259000 | -0.18909500 |

**Cat1-TS1**

Sum of electronic and thermal Free Energies =  
-2371.78395 Hartree

Sum of electronic and thermal free energies + the entropy  
correction at 298.15K = -2371.77428 Hartree

|   |            |             |             |
|---|------------|-------------|-------------|
| C | 3.19392500 | 0.52153400  | -0.58954800 |
| C | 6.41516200 | -0.67619600 | -0.88382900 |
| C | 5.54929000 | -0.63785000 | 0.21616500  |
| C | 6.04308500 | -0.22900900 | 1.45407800  |
| C | 7.38347900 | 0.12920500  | 1.54301200  |
| C | 8.22475100 | 0.09693500  | 0.42053800  |
| C | 7.75266500 | -0.30787900 | -0.82176100 |
| H | 9.26288000 | 0.38928600  | 0.52457200  |
| H | 8.39084200 | -0.34035500 | -1.69654200 |
| H | 5.39618300 | -0.18938200 | 2.32361200  |
| H | 7.78876400 | 0.44442900  | 2.49744000  |
| C | 4.42713900 | -1.39274900 | -1.62621000 |
| N | 5.67092100 | -1.14481100 | -1.97955500 |
| H | 3.70357600 | -1.74488600 | -2.34800200 |
| H | 6.03279900 | -1.24346200 | -2.92384800 |

|   |             |             |             |                                                           |             |             |             |
|---|-------------|-------------|-------------|-----------------------------------------------------------|-------------|-------------|-------------|
| C | 4.20905200  | -0.99869800 | -0.26817700 | C                                                         | -5.72250600 | 5.09748700  | -0.53087700 |
| H | 3.49527300  | -1.52778500 | 0.35208200  | H                                                         | -6.44491700 | 5.88005100  | -0.72787700 |
| O | 2.04299200  | 0.14007500  | -1.07404600 | C                                                         | -6.08068200 | 4.03516300  | 0.32005700  |
| H | 3.87231100  | 1.04862300  | -1.27849400 | H                                                         | -7.07137000 | 4.02315000  | 0.75778900  |
| C | 3.19236200  | 1.19037100  | 0.76401400  | C                                                         | -5.20182100 | 3.00452800  | 0.61241300  |
| C | 4.04037800  | 2.26861300  | 1.00944800  | C                                                         | -4.62744800 | -3.66871400 | 1.06978500  |
| C | 2.32669500  | 0.75383800  | 1.76888300  | C                                                         | -5.31893900 | -4.86097300 | 0.93052400  |
| C | 4.02453500  | 2.90860300  | 2.24767300  | H                                                         | -6.30769700 | -4.95068300 | 1.36353700  |
| H | 4.71442100  | 2.60786500  | 0.22844300  | C                                                         | -4.77302600 | -5.95935400 | 0.23972300  |
| C | 2.31423500  | 1.38560400  | 3.00677600  | H                                                         | -5.35405900 | -6.86961600 | 0.15645900  |
| H | 1.66124200  | -0.08197800 | 1.57647100  | C                                                         | -3.51464900 | -5.90741800 | -0.33706700 |
| C | 3.16447200  | 2.46583500  | 3.24816300  | H                                                         | -4.19120500 | 5.98238500  | -1.77988100 |
| H | 4.68421400  | 3.74937300  | 2.42992500  | H                                                         | -5.46956400 | 2.18360300  | 1.26602500  |
| H | 1.64198900  | 1.03968200  | 3.78405200  | H                                                         | -5.03991600 | -2.81854400 | 1.59895900  |
| H | 3.15276700  | 2.96021800  | 4.21287200  | H                                                         | -3.09204800 | -6.74842400 | -0.87222200 |
| C | -2.68767900 | -0.18871000 | 0.24075200  | H                                                         | -2.74090900 | -0.26958800 | -0.83937100 |
| C | -2.61088500 | 0.01784200  | 3.03263000  | <b>cat1-INT1</b>                                          |             |             |             |
| C | -2.74893500 | 1.04713700  | 0.87192500  | Sum of electronic and thermal Free Energies =             |             |             |             |
| C | -2.54056900 | -1.31439000 | 1.04073100  | -2371.78536 Hartree                                       |             |             |             |
| C | -2.50709200 | -1.22953100 | 2.42740300  | Sum of electronic and thermal free energies + the entropy |             |             |             |
| C | -2.71885500 | 1.16604500  | 2.25589100  | correction at 298.15K = -2371.77571 Hartree               |             |             |             |
| H | -2.39167200 | -2.13118700 | 3.01779400  | C                                                         | -3.21170900 | -0.33952900 | 0.40770000  |
| H | -2.76824900 | 2.14835000  | 2.71116100  | C                                                         | -5.28413100 | -0.70489900 | -2.37986800 |
| C | -1.85250500 | 2.76042800  | -0.68670400 | C                                                         | -5.22903900 | 0.07775900  | -1.22713600 |
| N | -2.28322900 | 3.89290400  | -1.24257800 | C                                                         | -6.41578600 | 0.42478300  | -0.59447300 |
| C | -1.33856500 | -3.05996700 | -0.25634900 | C                                                         | -7.61292200 | -0.03951500 | -1.13939700 |
| N | -1.55779900 | -4.31851200 | -0.63590300 | C                                                         | -7.63297700 | -0.83413800 | -2.28961300 |
| I | -0.00172800 | 1.83114800  | -0.90404800 | C                                                         | -6.45371100 | -1.18395400 | -2.94196000 |
| I | 0.32560200  | -1.87786700 | -0.63410600 | H                                                         | -8.58084200 | -1.17943100 | -2.68428200 |
| C | -1.55574100 | 4.77824200  | -2.14810500 | H                                                         | -6.44802700 | -1.79136500 | -3.83856200 |
| H | -1.52126200 | 5.77448800  | -1.70880900 | H                                                         | -6.41516900 | 1.04159800  | 0.29680500  |
| H | -2.07575600 | 4.80644200  | -3.10509800 | H                                                         | -8.54945600 | 0.22162200  | -0.66086600 |
| H | -0.54578000 | 4.40163600  | -2.28612900 | C                                                         | -3.10248700 | -0.27595700 | -2.06531500 |
| C | -0.67291900 | -5.17475800 | -1.42288500 | N                                                         | -3.94994500 | -0.88026200 | -2.83285000 |
| H | -1.04179600 | -5.22751200 | -2.44703100 | H                                                         | -2.03774800 | -0.31520600 | -2.25752100 |
| H | -0.66823800 | -6.16594600 | -0.97255200 | H                                                         | -3.69295500 | -1.42622800 | -3.65490100 |
| H | 0.33361500  | -4.76481300 | -1.40603800 | C                                                         | -3.78759800 | 0.35454700  | -0.92011400 |
| H | -2.58408200 | 0.09755400  | 4.11188900  | H                                                         | -3.53127100 | 1.41436300  | -0.82633400 |
| C | -3.94575500 | 3.08212100  | 0.01759200  | O                                                         | -1.87451300 | -0.08140900 | 0.50228500  |
| C | -3.59009900 | 4.13229300  | -0.82654200 | H                                                         | -3.42870600 | -1.41554900 | 0.29786200  |
| C | -3.36318400 | -3.62158000 | 0.48886700  | C                                                         | -4.02040200 | 0.17457500  | 1.58576100  |
| C | -2.81910600 | -4.70888200 | -0.19287100 | C                                                         | -4.93569700 | -0.65192500 | 2.23352000  |
| N | -2.83627200 | 2.24004100  | 0.07797900  | C                                                         | -3.86563200 | 1.49253200  | 2.01847800  |
| N | -2.41115700 | -2.60548900 | 0.42483700  | C                                                         | -5.69460200 | -0.16860700 | 3.29891400  |
| C | -4.47174200 | 5.16876900  | -1.12280300 | H                                                         | -5.05922700 | -1.67755400 | 1.89879600  |

|   |             |             |             |                                                           |             |             |             |
|---|-------------|-------------|-------------|-----------------------------------------------------------|-------------|-------------|-------------|
| C | -4.62220800 | 1.97919100  | 3.07911900  | H                                                         | 5.69566000  | 6.30971600  | -1.86999700 |
| H | -3.15069300 | 2.13983800  | 1.51925600  | C                                                         | 3.75212200  | 5.49846500  | -1.52210700 |
| C | -5.54165400 | 1.14855600  | 3.72071600  | H                                                         | 3.14226000  | -6.57338000 | -1.20840900 |
| H | -6.40409200 | -0.82042800 | 3.79633700  | H                                                         | 5.70765100  | -2.56327300 | 0.42464000  |
| H | -4.49776700 | 3.00535300  | 3.40663800  | H                                                         | 5.71053500  | 2.48969400  | 0.12854900  |
| H | -6.13213400 | 1.52794800  | 4.54697700  | H                                                         | 3.20749100  | 6.31735800  | -1.97518200 |
| C | 2.86373700  | -0.01452500 | 0.11891400  | H                                                         | 2.47879300  | -0.06387800 | -0.89321000 |
| C | 3.91791600  | 0.11724500  | 2.70910800  | <b>Cat1-TS2</b>                                           |             |             |             |
| C | 3.11399000  | -1.16984500 | 0.85044000  | Sum of electronic and thermal Free Energies =             |             |             |             |
| C | 3.10883700  | 1.20732100  | 0.73348500  | -2371.75112 Hartree                                       |             |             |             |
| C | 3.63771300  | 1.28900400  | 2.01615700  | Sum of electronic and thermal free energies + the entropy |             |             |             |
| C | 3.64430300  | -1.11860300 | 2.13402300  | correction at 298.15K = -2371.74146 Hartree               |             |             |             |
| H | 3.81847700  | 2.26025900  | 2.46232400  | C                                                         | 2.74959100  | -2.36688700 | -0.19366800 |
| H | 3.82882900  | -2.03948800 | 2.67523800  | O                                                         | 1.63770100  | -1.56800000 | -0.58490500 |
| C | 1.58512800  | -2.95012000 | 0.02801600  | H                                                         | 2.57989500  | -3.41936800 | -0.45939100 |
| N | 1.71285200  | -4.19729000 | -0.42860400 | C                                                         | 3.10920300  | -2.28804500 | 1.27414900  |
| C | 1.59993600  | 2.91955700  | -0.26752200 | C                                                         | 2.23712900  | -1.72020100 | 2.19922400  |
| N | 1.73947400  | 4.09989400  | -0.87193400 | C                                                         | 4.33162300  | -2.80239000 | 1.71566500  |
| I | -0.17169200 | -1.78370400 | 0.28401700  | C                                                         | 2.58459900  | -1.65672800 | 3.54898200  |
| I | -0.15622200 | 1.86324600  | 0.10802700  | H                                                         | 1.28525300  | -1.32448400 | 1.86587900  |
| C | 0.64251200  | -5.10617300 | -0.82589300 | C                                                         | 4.67918000  | -2.74003400 | 3.05983500  |
| H | 0.66122900  | -5.98103600 | -0.17642700 | H                                                         | 5.01829900  | -3.24319300 | 0.99824000  |
| H | 0.80030500  | -5.40494200 | -1.86186500 | C                                                         | 3.80585100  | -2.16201300 | 3.98162300  |
| H | -0.31274600 | -4.59655800 | -0.73091000 | H                                                         | 1.89849900  | -1.20979900 | 4.25980700  |
| C | 0.68471200  | 4.97185000  | -1.38089600 | H                                                         | 5.63322800  | -3.13567600 | 3.38953400  |
| H | -0.28143000 | 4.59620600  | -1.05465500 | H                                                         | 4.07838500  | -2.10780600 | 5.02941500  |
| H | 0.73152200  | 4.98931100  | -2.46957200 | C                                                         | 5.67218700  | -0.69803200 | -1.93501200 |
| H | 0.84183400  | 5.97284100  | -0.98124500 | C                                                         | 4.76681300  | -0.70593500 | -0.86448900 |
| H | 4.32842800  | 0.16723200  | 3.70956700  | C                                                         | 4.89297700  | 0.25568000  | 0.14076400  |
| C | 3.77182300  | -3.43108600 | -0.01065200 | C                                                         | 5.91243200  | 1.19260100  | 0.02857700  |
| C | 3.06141000  | -4.54069800 | -0.46526900 | C                                                         | 6.79524800  | 1.18904900  | -1.06287700 |
| C | 3.78834500  | 3.34046500  | -0.39243300 | C                                                         | 6.68937600  | 0.23979200  | -2.06932700 |
| C | 3.09477800  | 4.40060400  | -0.97254000 | C                                                         | 4.30388200  | -2.43281800 | -2.30596700 |
| N | 2.81870900  | -2.45498700 | 0.28200000  | C                                                         | 3.81288200  | -1.79568100 | -1.13141000 |
| N | 2.82237800  | 2.42878000  | 0.03262800  | H                                                         | 4.22095900  | 0.26744800  | 0.99151800  |
| C | 3.70010300  | -5.71413300 | -0.85750700 | H                                                         | 6.03228500  | 1.94224100  | 0.80208300  |
| C | 5.08368600  | -5.71863200 | -0.77210000 | H                                                         | 7.57630700  | 1.93792200  | -1.11837400 |
| H | 5.62826700  | -6.60834700 | -1.06394400 | H                                                         | 7.36408400  | 0.22266300  | -2.91674800 |
| C | 5.80023100  | -4.59696300 | -0.31644700 | H                                                         | 5.81136100  | -1.97769900 | -3.65304600 |
| H | 6.88124400  | -4.64666700 | -0.26882700 | H                                                         | 3.90178600  | -3.29588200 | -2.81939300 |
| C | 5.16120000  | -3.42992000 | 0.07328800  | H                                                         | 2.72751400  | -1.28060700 | -1.54049700 |
| C | 5.17861500  | 3.31686600  | -0.32491500 | N                                                         | 5.34126000  | -1.76790300 | -2.77725300 |
| C | 5.83556800  | 4.40876400  | -0.86928100 | C                                                         | -2.50909500 | 0.96424400  | -0.22161100 |
| H | 6.91802200  | 4.43902100  | -0.84284600 | C                                                         | -3.26720100 | 1.55806600  | -2.85185100 |
| C | 5.13606000  | 5.47939300  | -1.45698900 | C                                                         | -3.28449700 | 0.08066800  | -0.96252300 |

|                                               |             |             |             |                                                           |             |             |                     |
|-----------------------------------------------|-------------|-------------|-------------|-----------------------------------------------------------|-------------|-------------|---------------------|
| C                                             | -2.08311400 | 2.12952800  | -0.84731400 | -2448.18874 Hartree                                       |             |             |                     |
| C                                             | -2.45613900 | 2.44156100  | -2.14910300 | Sum of electronic and thermal free energies + the entropy |             |             |                     |
| C                                             | -3.67433200 | 0.36501500  | -2.26567000 | correction at 298.15K =                                   |             |             | -2448.17907 Hartree |
| H                                             | -2.10564300 | 3.36158800  | -2.60236200 | C                                                         | -2.88506900 | 0.14221200  | 0.30216600          |
| H                                             | -4.28145100 | -0.34853500 | -2.81094300 | C                                                         | -3.03509100 | 0.04874800  | 3.09673100          |
| C                                             | -2.89993200 | -2.21933600 | -0.10132800 | C                                                         | -2.85421600 | 1.30465200  | 1.06213700          |
| N                                             | -3.64882900 | -3.21471000 | 0.37474000  | C                                                         | -2.94316800 | -1.06928700 | 0.97888000          |
| C                                             | 0.05693800  | 2.84941500  | 0.19544200  | C                                                         | -3.02481700 | -1.13295000 | 2.36454900          |
| N                                             | 0.53431600  | 3.94152900  | 0.79109200  | C                                                         | -2.93520800 | 1.27493900  | 2.44898900          |
| I                                             | -0.81549700 | -2.15782500 | -0.34929200 | H                                                         | -3.07088500 | -2.09773000 | 2.85640200          |
| I                                             | 1.04850700  | 1.05795600  | -0.12267400 | H                                                         | -2.91098600 | 2.20271500  | 3.00884000          |
| C                                             | -3.20046600 | -4.53094800 | 0.81950600  | C                                                         | -1.65089300 | 3.03902300  | -0.25059900         |
| H                                             | -3.36655500 | -4.61878700 | 1.89299500  | N                                                         | -1.89922200 | 4.27478400  | -0.68525600         |
| H                                             | -2.14308100 | -4.64451200 | 0.59591000  | C                                                         | -1.85334100 | -2.80401500 | -0.42585000         |
| H                                             | -3.77172100 | -5.29064400 | 0.28746500  | N                                                         | -2.18314000 | -3.98223400 | -0.95445100         |
| C                                             | 1.87389200  | 4.12159200  | 1.34779200  | I                                                         | 0.07906200  | 1.89602900  | -0.52534900         |
| H                                             | 1.85636000  | 3.89727100  | 2.41430100  | I                                                         | -0.03466200 | -1.82397500 | -0.58190600         |
| H                                             | 2.17374500  | 5.15475800  | 1.18537000  | C                                                         | -1.00946100 | 5.15118600  | -1.44243900         |
| H                                             | 2.56907600  | 3.46144100  | 0.83419600  | H                                                         | -1.50627600 | 5.43444100  | -2.36981300         |
| H                                             | -3.56338600 | 1.78906700  | -3.86713800 | H                                                         | -0.08713000 | 4.62196000  | -1.66620100         |
| C                                             | -5.01689000 | -1.50315100 | -0.07607700 | H                                                         | -0.79430600 | 6.03641200  | -0.84480200         |
| C                                             | -4.98000600 | -2.80943400 | 0.40796900  | C                                                         | -1.33731600 | -4.84951200 | -1.77180600         |
| C                                             | -1.60374700 | 4.33280700  | 0.25751300  | H                                                         | -1.53229000 | -5.88202600 | -1.48754000         |
| C                                             | -0.47761400 | 4.89627500  | 0.85647400  | H                                                         | -0.29272900 | -4.61569800 | -1.58147900         |
| N                                             | -3.69799500 | -1.16442800 | -0.37879900 | H                                                         | -1.57358000 | -4.69693200 | -2.82481700         |
| N                                             | -1.23460800 | 3.04788200  | -0.13916800 | H                                                         | -3.09766400 | 0.01322300  | 4.17686300          |
| C                                             | -6.13147300 | -3.47573800 | 0.81962000  | C                                                         | -3.71978200 | 3.56427200  | 0.40402600          |
| C                                             | -7.31838800 | -2.76731600 | 0.72045900  | C                                                         | -3.18344000 | 4.64393900  | -0.29480700         |
| H                                             | -8.24311600 | -3.24069400 | 1.02706900  | C                                                         | -3.97753900 | -3.19160500 | 0.12446600          |
| C                                             | -7.35460600 | -1.44801600 | 0.23191600  | C                                                         | -3.51065900 | -4.26094600 | -0.63854500         |
| H                                             | -8.30649500 | -0.93446600 | 0.17362300  | N                                                         | -2.73569600 | 2.57635600  | 0.40726100          |
| C                                             | -6.20663900 | -0.78735700 | -0.17638600 | N                                                         | -2.91535500 | -2.29518900 | 0.23191100          |
| C                                             | -2.80843400 | 5.02254800  | 0.15053500  | C                                                         | -3.90381500 | 5.81787600  | -0.50198600         |
| C                                             | -2.82751800 | 6.30391700  | 0.67627400  | C                                                         | -5.18402400 | 5.85248400  | 0.02667400          |
| H                                             | -3.74102500 | 6.88315600  | 0.62018900  | H                                                         | -5.78582400 | 6.74322600  | -0.10587200         |
| C                                             | -1.69291700 | 6.87364000  | 1.28432000  | C                                                         | -5.72522200 | 4.76012900  | 0.73033200          |
| H                                             | -1.75856100 | 7.87871200  | 1.68263700  | H                                                         | -6.73222600 | 4.83409400  | 1.12237100          |
| C                                             | -0.49631900 | 6.18375700  | 1.38866800  | C                                                         | -5.00680000 | 3.59286500  | 0.93369300          |
| H                                             | -6.09489800 | -4.49037000 | 1.19624000  | C                                                         | -5.27955500 | -3.14473400 | 0.61498900          |
| H                                             | -6.22778100 | 0.22770200  | -0.55335000 | C                                                         | -6.08959600 | -4.22349100 | 0.30069000          |
| H                                             | -3.67745400 | 4.57580000  | -0.31644400 | H                                                         | -7.11208900 | -4.23644000 | 0.65767500          |
| H                                             | 0.37738500  | 6.61591200  | 1.85996200  | C                                                         | -5.62144600 | -5.30293000 | -0.47222900         |
| H                                             | -2.24025700 | 0.74674300  | 0.80624000  | H                                                         | -6.29435900 | -6.12234900 | -0.69322500         |
| <b>Cat1-TS2'</b>                              |             |             |             | C                                                         | -4.32519500 | -5.34499900 | -0.95871500         |
| Sum of electronic and thermal Free Energies = |             |             |             | H                                                         | -3.48248300 | 6.65404700  | -1.04601900         |

|                                                           |             |             |                     |   |             |             |             |
|-----------------------------------------------------------|-------------|-------------|---------------------|---|-------------|-------------|-------------|
| H                                                         | -5.41749600 | 2.74774200  | 1.47220400          | C | 2.86473300  | -3.07537400 | 0.62744800  |
| H                                                         | -5.63208700 | -2.30957800 | 1.20759000          | C | 1.90288000  | -2.64668800 | 1.53779800  |
| H                                                         | -3.96134900 | -6.17076000 | -1.55725200         | C | 3.93095200  | -3.85639500 | 1.08069300  |
| H                                                         | -2.85925600 | 0.17803800  | -0.78129300         | C | 2.00822600  | -2.98590200 | 2.88710000  |
| C                                                         | 2.92124200  | 0.07323000  | 0.22848600          | H | 1.07590000  | -2.02995000 | 1.21000000  |
| C                                                         | 6.25768000  | 1.84291800  | 0.25736100          | C | 4.03662000  | -4.19537200 | 2.42377200  |
| C                                                         | 5.59817800  | 0.60287300  | 0.24767300          | H | 4.68506700  | -4.19090100 | 0.37462700  |
| C                                                         | 6.34292900  | -0.54255400 | 0.55546300          | C | 3.07458000  | -3.75725800 | 3.33409500  |
| C                                                         | 7.68893900  | -0.39792700 | 0.86476000          | H | 1.25515000  | -2.63989400 | 3.58615400  |
| C                                                         | 8.31788400  | 0.85656000  | 0.85996900          | H | 4.87013700  | -4.80013600 | 2.76249000  |
| C                                                         | 7.60767700  | 2.00502900  | 0.54799000          | H | 3.15804000  | -4.01824800 | 4.38282400  |
| H                                                         | 9.37173000  | 0.92792000  | 1.10117800          | C | 5.58747900  | -0.16851000 | -1.33116400 |
| H                                                         | 8.07204800  | 2.98365400  | 0.53163600          | C | 4.64550000  | -0.76867100 | -0.45899600 |
| H                                                         | 5.89171000  | -1.52651800 | 0.55369800          | C | 4.55906900  | -0.29181500 | 0.86395900  |
| H                                                         | 8.27025600  | -1.27848900 | 1.11258600          | C | 5.38194300  | 0.74824100  | 1.25805500  |
| C                                                         | 4.13851600  | 2.27979000  | -0.29544100         | C | 6.30155700  | 1.33607100  | 0.36480700  |
| N                                                         | 5.31944300  | 2.82298200  | -0.08156500         | C | 6.41892700  | 0.88530000  | -0.93729500 |
| H                                                         | 3.28808200  | 2.89298600  | -0.56445000         | C | 4.54558200  | -1.78251700 | -2.47539000 |
| H                                                         | 5.52862300  | 3.81218900  | -0.18285700         | C | 3.98019400  | -1.79948000 | -1.22413900 |
| C                                                         | 4.20583100  | 0.85759700  | -0.18843200         | H | 3.85877300  | -0.72639500 | 1.56799700  |
| H                                                         | 4.15940800  | 0.60932200  | -1.46138000         | H | 5.32109300  | 1.12039200  | 2.27459600  |
| O                                                         | 1.95811200  | 0.13794200  | -0.79238800         | H | 6.92987000  | 2.15051500  | 0.70685600  |
| H                                                         | 2.52866900  | 0.55254900  | 1.13512900          | H | 7.12652500  | 1.32490000  | -1.63099100 |
| C                                                         | 3.27588700  | -1.35805700 | 0.58965500          | H | 6.06862200  | -0.60536700 | -3.35523400 |
| C                                                         | 3.41330400  | -1.72881000 | 1.92566200          | H | 4.32966500  | -2.40677800 | -3.33061900 |
| C                                                         | 3.48782800  | -2.31045600 | -0.40936100         | H | 1.55126500  | -1.89926500 | -2.07812600 |
| C                                                         | 3.77002200  | -3.03257300 | 2.26453300          | N | 5.50010200  | -0.80800900 | -2.54431700 |
| H                                                         | 3.24509800  | -0.99112300 | 2.70454500          | C | -2.29357800 | 1.24645000  | -0.17201300 |
| C                                                         | 3.84426200  | -3.61283100 | -0.07368700         | C | -3.10808700 | 2.12424600  | -2.70546700 |
| H                                                         | 3.37915000  | -2.03215400 | -1.45280000         | C | -3.26514700 | 0.56470900  | -0.89266500 |
| C                                                         | 3.98903000  | -3.97636000 | 1.26465800          | C | -1.71503800 | 2.35829100  | -0.77018400 |
| H                                                         | 3.87333500  | -3.31089000 | 3.30733600          | C | -2.11036200 | 2.81082400  | -2.02240700 |
| H                                                         | 4.01004900  | -4.34534400 | -0.85578900         | C | -3.68456800 | 0.98890200  | -2.14773700 |
| H                                                         | 4.26625600  | -4.99140800 | 1.52564600          | H | -1.63443800 | 3.68393900  | -2.45349400 |
| O                                                         | 3.52953200  | 0.14194000  | -2.60545200         | H | -4.44890700 | 0.43084300  | -2.67603800 |
| H                                                         | 3.42419900  | 0.85714600  | -3.24532300         | C | -3.29816800 | -1.80417400 | -0.13677500 |
| H                                                         | 2.65649300  | 0.11322800  | -1.93468500         | N | -4.17421200 | -2.65254500 | 0.39737300  |
| <b>Cat1-INT2</b>                                          |             |             |                     | C | 0.56871300  | 2.61325300  | 0.15863900  |
| Sum of electronic and thermal Free Energies =             |             |             |                     | N | 1.27652100  | 3.54415100  | 0.79490000  |
| -2371.82735 Hartree                                       |             |             |                     | I | -1.34674200 | -2.24889600 | -0.60052100 |
| Sum of electronic and thermal free energies + the entropy |             |             |                     | I | 1.25358300  | 0.74880800  | -0.37177400 |
| correction at 298.15K =                                   |             |             | -2371.81765 Hartree | C | -3.90840900 | -4.05331500 | 0.73148900  |
| C                                                         | 2.83503200  | -2.68880400 | -0.83514800         | H | -3.77142600 | -4.62748800 | -0.18428100 |
| O                                                         | 1.57021300  | -2.04405100 | -1.12034500         | H | -4.76306200 | -4.43685800 | 1.28172900  |
| H                                                         | 2.88310500  | -3.60119300 | -1.43834900         | H | -3.02016700 | -4.11173000 | 1.35880900  |

|                                                           |             |             |             |   |             |             |             |
|-----------------------------------------------------------|-------------|-------------|-------------|---|-------------|-------------|-------------|
| C                                                         | 2.66915800  | 3.40265200  | 1.22589400  | O | 1.42412700  | -1.94786500 | -0.38962700 |
| H                                                         | 3.00642000  | 4.36704200  | 1.59578600  | H | 2.70303600  | -3.38419000 | 1.19084100  |
| H                                                         | 3.28292100  | 3.10736900  | 0.37553500  | C | 2.80066100  | -1.39376400 | 2.00146700  |
| H                                                         | 2.73068800  | 2.65951700  | 2.02089000  | C | 1.52787200  | -1.48033800 | 2.58682000  |
| H                                                         | -3.42464000 | 2.46479500  | -3.68300000 | C | 3.66166300  | -0.35780000 | 2.38327600  |
| C                                                         | -5.19981700 | -0.68463300 | 0.10486600  | C | 1.09274100  | -0.50371500 | 3.46768300  |
| C                                                         | -5.38910300 | -1.98963000 | 0.56130600  | H | 0.87976500  | -2.30575200 | 2.31454700  |
| C                                                         | -0.77643300 | 4.35968200  | 0.43018100  | C | 3.22786600  | 0.61443500  | 3.27657400  |
| C                                                         | 0.46629500  | 4.66114100  | 0.99013900  | H | 4.67737600  | -0.32918800 | 2.01049200  |
| N                                                         | -3.87484000 | -0.60297200 | -0.32140800 | C | 1.93830300  | 0.55596700  | 3.80025700  |
| N                                                         | -0.67632400 | 3.06476800  | -0.07665700 | H | 0.09937900  | -0.56355000 | 3.89692800  |
| C                                                         | -6.61827000 | -2.41407800 | 1.06478000  | H | 3.89790700  | 1.41464900  | 3.56846700  |
| C                                                         | -7.63205300 | -1.47208500 | 1.08680100  | H | 1.59894600  | 1.32327300  | 4.48704900  |
| H                                                         | -8.60534600 | -1.75650100 | 1.46742600  | C | 6.00019400  | -2.09947600 | -1.29011600 |
| C                                                         | -7.43531700 | -0.15513400 | 0.62893200  | C | 5.08378500  | -1.40596800 | -0.47641700 |
| H                                                         | -8.26077000 | 0.54499900  | 0.66866800  | C | 5.08168200  | -0.00701700 | -0.53445500 |
| C                                                         | -6.21572100 | 0.26747100  | 0.12972400  | C | 6.00234100  | 0.63301900  | -1.35281400 |
| C                                                         | -1.83887400 | 5.25969800  | 0.44824500  | C | 6.92716500  | -0.08858100 | -2.12161900 |
| C                                                         | -1.59501300 | 6.47910000  | 1.05600300  | C | 6.93475700  | -1.47532500 | -2.10704600 |
| H                                                         | -2.38771200 | 7.21605500  | 1.09779700  | C | 4.73236100  | -3.66692500 | -0.32883200 |
| C                                                         | -0.34373100 | 6.78656300  | 1.62380200  | C | 4.26527800  | -2.43130000 | 0.17428500  |
| H                                                         | -0.20163600 | 7.75352400  | 2.09064500  | H | 4.37619600  | 0.57879800  | 0.03995700  |
| C                                                         | 0.70984800  | 5.88868900  | 1.60471700  | H | 6.00518500  | 1.71577400  | -1.39845600 |
| H                                                         | -6.77338800 | -3.42524300 | 1.41780600  | H | 7.63660600  | 0.44315700  | -2.74431500 |
| H                                                         | -6.05419600 | 1.27786600  | -0.22509500 | H | 7.62397400  | -2.05303800 | -2.71114900 |
| H                                                         | -2.79709600 | 5.01192800  | 0.00848600  | H | 6.27621700  | -4.20253600 | -1.61142300 |
| H                                                         | 1.66880200  | 6.12650900  | 2.04628700  | H | 4.37219800  | -4.65964800 | -0.09665300 |
| H                                                         | -1.99982200 | 0.92639100  | 0.82179400  | H | 1.77224900  | -2.29653600 | -1.21933600 |
| <b>Cat1-TS3</b>                                           |             |             |             | N | 5.75236800  | -3.46730500 | -1.14694200 |
| Sum of electronic and thermal Free Energies =             |             |             |             | C | -2.35795500 | 1.02624600  | -0.38167100 |
| -2371.78056 Hartree                                       |             |             |             | C | -3.12867000 | 1.59866000  | -3.01197800 |
| Sum of electronic and thermal free energies + the entropy |             |             |             | C | -3.25324300 | 0.20786800  | -1.06028000 |
| correction at 298.15K =                                   |             |             |             | C | -1.81874500 | 2.10742700  | -1.06947500 |
| -2371.77084 Hartree                                       |             |             |             | C | -2.19706800 | 2.40818600  | -2.37220500 |
| C                                                         | 3.18943700  | -2.42395100 | 1.05300000  | C | -2.19706800 | 2.40818600  | -2.37220500 |
| C                                                         | -3.65004100 | 0.48528700  | -2.36343600 | N | 1.04076700  | 3.65111900  | 0.42683000  |
| H                                                         | -1.75675800 | 3.26112900  | -2.87553600 | I | -0.99584700 | -2.22709700 | -0.24883600 |
| H                                                         | -4.35272200 | -0.17327100 | -2.86110900 | I | 1.15010000  | 0.65027300  | -0.32864300 |
| C                                                         | -3.11297900 | -2.07068500 | -0.06575900 | C | -3.67643800 | -4.29013900 | 0.94519100  |
| N                                                         | -3.97783200 | -2.95741700 | 0.43210600  | H | -2.62703200 | -4.51127400 | 0.76944900  |
| C                                                         | 0.42176300  | 2.59673800  | -0.10662700 |   |             |             |             |
| H                                                         | -4.29779800 | -5.01557100 | 0.42118200  | H | 2.90181600  | 4.57638600  | 0.52074000  |
| H                                                         | -3.88905900 | -4.31791800 | 2.01377500  | H | -3.43009400 | 1.82176900  | -4.02754100 |
| C                                                         | 2.40389800  | 3.70703800  | 0.94817400  | C | -5.14985900 | -1.14207500 | -0.14021000 |
| H                                                         | 2.93582000  | 2.80318100  | 0.66052400  | C | -5.26131800 | -2.41932500 | 0.40573900  |
| H                                                         | 2.36755000  | 3.79124400  | 2.03443700  | C | -1.03873600 | 4.28671900  | -0.09987200 |



|                                                           |             |             |             |   |             |             |             |
|-----------------------------------------------------------|-------------|-------------|-------------|---|-------------|-------------|-------------|
| C                                                         | 0.16234100  | 4.73088100  | 0.45081400  | C | 1.81532500  | -3.83934500 | 1.22319600  |
| N                                                         | -3.79498400 | -0.95529900 | -0.41600900 | C | 2.25894300  | -2.49011400 | 1.46749700  |
| N                                                         | -0.84309300 | 2.94566600  | -0.42962900 | H | 4.34053700  | -0.36895700 | 0.89541800  |
| C                                                         | -6.48644300 | -2.94025400 | 0.81446200  | H | 6.31033700  | -0.87150000 | -0.46416300 |
| C                                                         | -7.59072600 | -2.11936000 | 0.64680000  | H | 6.69099700  | -3.12653100 | -1.39036200 |
| H                                                         | -8.56683500 | -2.47861400 | 0.94918200  | H | 5.03103600  | -4.95257600 | -0.97782100 |
| C                                                         | -7.47692500 | -0.83015700 | 0.09535300  | H | 2.62252700  | -5.45422700 | 0.23208000  |
| H                                                         | -8.36798100 | -0.22417600 | -0.01480300 | H | 0.89221400  | -4.29770800 | 1.55194900  |
| C                                                         | -6.25577000 | -0.31379700 | -0.30963900 | H | 1.00357200  | -3.05960100 | -2.16102400 |
| C                                                         | -2.14533600 | 5.12136900  | -0.22785900 | N | 2.71137900  | -4.48806000 | 0.53654400  |
| C                                                         | -1.98638700 | 6.42214200  | 0.22345800  | C | -1.64270600 | 1.31993500  | -0.47482500 |
| H                                                         | -2.81800900 | 7.11192800  | 0.14656900  | C | -2.70235800 | 2.42342000  | -2.81136900 |
| C                                                         | -0.77474000 | 6.87171200  | 0.78025100  | C | -2.87745800 | 0.90728200  | -0.96003200 |
| H                                                         | -0.70021100 | 7.89759000  | 1.11969100  | C | -0.92714900 | 2.25671100  | -1.20891200 |
| C                                                         | 0.32401100  | 6.03669800  | 0.90686100  | C | -1.44621800 | 2.82213100  | -2.36754500 |
| H                                                         | -6.56740400 | -3.93252700 | 1.24055300  | C | -3.41775600 | 1.45219000  | -2.11910900 |
| H                                                         | -6.16245000 | 0.67876500  | -0.73279700 | H | -0.86549700 | 3.55524100  | -2.91549700 |
| H                                                         | -3.07514300 | 4.76834200  | -0.65655100 | H | -4.38259300 | 1.11122900  | -2.47644000 |
| H                                                         | 1.25818500  | 6.37535800  | 1.33712300  | C | -3.24323200 | -1.38612900 | -0.06264900 |
| H                                                         | -2.08031700 | 0.82108000  | 0.64613300  | N | -4.21755600 | -2.01717700 | 0.59668000  |
| <b>Cat1-INT3</b>                                          |             |             |             | C | 1.51175100  | 1.90991900  | -0.85671200 |
| Sum of electronic and thermal Free Energies =             |             |             |             | N | 2.54664900  | 2.65366300  | -0.45790900 |
| -2371.784251 Hartree                                      |             |             |             | I | -1.35003300 | -2.17491200 | -0.68880700 |
| Sum of electronic and thermal free energies + the entropy |             |             |             | I | 1.48341200  | -0.15168900 | -1.29177600 |
| correction at 298.15K =                                   |             |             |             | C | -4.18925600 | -3.43060700 | 0.96935300  |
| -2371.77440 Hartree                                       |             |             |             | H | -5.04171200 | -3.63335100 | 1.61260400  |
| C                                                         | 1.40826600  | -1.65372800 | 2.12427800  | H | -3.26930500 | -3.64375900 | 1.51174100  |
| O                                                         | 0.91912200  | -2.59713900 | -1.32009200 | H | -4.25109500 | -4.04748800 | 0.07343000  |
| H                                                         | 0.44537600  | -2.09122200 | 2.38254000  | C | 3.94923300  | 2.25410500  | -0.40201800 |
| C                                                         | 1.54034900  | -0.24819700 | 2.45586800  | H | 4.06635900  | 1.29286600  | -0.89678800 |
| C                                                         | 0.35702300  | 0.50745900  | 2.46736300  | H | 4.26496300  | 2.18189800  | 0.63924000  |
| C                                                         | 2.76026500  | 0.38369200  | 2.73542500  | H | 4.54228100  | 3.00689300  | -0.92066600 |
| C                                                         | 0.40134600  | 1.88324200  | 2.64364600  | H | -3.11572600 | 2.85367700  | -3.71473300 |
| H                                                         | -0.59079400 | -0.00005100 | 2.31538400  | C | -4.88744800 | 0.09256800  | 0.29139300  |
| C                                                         | 2.79548200  | 1.75405600  | 2.95781700  | C | -5.26878400 | -1.13425800 | 0.83627300  |
| H                                                         | 3.66374300  | -0.20572500 | 2.82755100  | C | 0.71414900  | 3.92502200  | -0.30265900 |
| C                                                         | 1.62430400  | 2.50924600  | 2.88168200  | C | 2.09329600  | 3.91865900  | -0.09834000 |
| H                                                         | -0.51337300 | 2.46483800  | 2.61428000  | N | -3.61871300 | -0.10033500 | -0.25605400 |
| H                                                         | 3.73719700  | 2.23745800  | 3.19118000  | N | 0.38470000  | 2.65546100  | -0.77552100 |
| H                                                         | 1.66139500  | 3.58242600  | 3.03474400  | C | -6.49453500 | -1.29531700 | 1.47970800  |
| C                                                         | 3.79464400  | -3.64908700 | 0.21046300  | C | -7.31012500 | -0.17712800 | 1.54892800  |
| C                                                         | 3.55604700  | -2.38669400 | 0.77792800  | H | -8.27285300 | -0.25722900 | 2.03884900  |
| C                                                         | 4.47856200  | -1.37261300 | 0.52118000  | C | -6.92059000 | 1.05898800  | 1.00263500  |
| C                                                         | 5.59445900  | -1.65934800 | -0.26107700 | H | -7.59043600 | 1.90642300  | 1.08326100  |
| C                                                         | 5.80973200  | -2.93473400 | -0.79023800 | C | -5.70129100 | 1.21993900  | 0.36431300  |
| C                                                         | 4.89757100  | -3.96043300 | -0.56405300 |   |             |             |             |

|                                                           |             |             |             |   |             |             |             |
|-----------------------------------------------------------|-------------|-------------|-------------|---|-------------|-------------|-------------|
| C                                                         | -0.06736400 | 5.04070700  | -0.01722300 | H | 3.15276700  | 2.96021800  | 4.21287200  |
| C                                                         | 0.60196100  | 6.14661900  | 0.48438700  | C | -2.68767900 | -0.18871000 | 0.24075200  |
| H                                                         | 0.03794200  | 7.03959700  | 0.72501600  | C | -2.61088500 | 0.01784200  | 3.03263000  |
| C                                                         | 1.99389500  | 6.14109500  | 0.69053600  | C | -2.74893500 | 1.04713700  | 0.87192500  |
| H                                                         | 2.47089900  | 7.02940500  | 1.08633400  | C | -2.54056900 | -1.31439000 | 1.04073100  |
| C                                                         | 2.76878100  | 5.02776100  | 0.40418600  | C | -2.50709200 | -1.22953100 | 2.42740300  |
| H                                                         | -6.79580000 | -2.24382500 | 1.90502200  | C | -2.71885500 | 1.16604500  | 2.25589100  |
| H                                                         | -5.39426200 | 2.16954500  | -0.05600500 | H | -2.39167200 | -2.13118700 | 3.01779400  |
| H                                                         | -1.13848500 | 5.03782300  | -0.17845100 | H | -2.76824900 | 2.14835000  | 2.71116100  |
| H                                                         | 3.83938000  | 5.01402100  | 0.56740300  | C | -1.85250500 | 2.76042800  | -0.68670400 |
| H                                                         | -1.24077300 | 0.91042400  | 0.44161900  | N | -2.28322900 | 3.89290400  | -1.24257800 |
| <b>TS4</b>                                                |             |             |             | C | -1.33856500 | -3.05996700 | -0.25634900 |
| Sum of electronic and thermal Free Energies=              |             |             |             | N | -1.55779900 | -4.31851200 | -0.63590300 |
| -996.77109 Hartree                                        |             |             |             | I | -0.00172800 | 1.83114800  | -0.90404800 |
| Sum of electronic and thermal free energies + the entropy |             |             |             | I | 0.32560200  | -1.87786700 | -0.63410600 |
| correction at 298.15K=                                    |             |             |             | C | -1.55574100 | 4.77824200  | -2.14810500 |
| -996.76079 Hartree                                        |             |             |             | H | -1.52126200 | 5.77448800  | -1.70880900 |
| C                                                         | 3.19392500  | 0.52153400  | -0.58954800 | H | -2.07575600 | 4.80644200  | -3.10509800 |
| C                                                         | 6.41516200  | -0.67619600 | -0.88382900 | H | -0.54578000 | 4.40163600  | -2.28612900 |
| C                                                         | 5.54929000  | -0.63785000 | 0.21616500  | C | -0.67291900 | -5.17475800 | -1.42288500 |
| C                                                         | 6.04308500  | -0.22900900 | 1.45407800  | H | -1.04179600 | -5.22751200 | -2.44703100 |
| C                                                         | 7.38347900  | 0.12920500  | 1.54301200  | H | -0.66823800 | -6.16594600 | -0.97255200 |
| C                                                         | 8.22475100  | 0.09693500  | 0.42053800  | H | 0.33361500  | -4.76481300 | -1.40603800 |
| C                                                         | 7.75266500  | -0.30787900 | -0.82176100 | H | -2.58408200 | 0.09755400  | 4.11188900  |
| H                                                         | 9.26288000  | 0.38928600  | 0.52457200  | C | -3.94575500 | 3.08212100  | 0.01759200  |
| H                                                         | 8.39084200  | -0.34035500 | -1.69654200 | C | -3.59009900 | 4.13229300  | -0.82654200 |
| H                                                         | 5.39618300  | -0.18938200 | 2.32361200  | C | -3.36318400 | -3.62158000 | 0.48886700  |
| H                                                         | 7.78876400  | 0.44442900  | 2.49744000  | C | -2.81910600 | -4.70888200 | -0.19287100 |
| C                                                         | 4.42713900  | -1.39274900 | -1.62621000 | N | -2.83627200 | 2.24004100  | 0.07797900  |
| N                                                         | 5.67092100  | -1.14481100 | -1.97955500 | N | -2.41115700 | -2.60548900 | 0.42483700  |
| H                                                         | 3.70357600  | -1.74488600 | -2.34800200 | C | -4.47174200 | 5.16876900  | -1.12280300 |
| H                                                         | 6.03279900  | -1.24346200 | -2.92384800 | C | -5.72250600 | 5.09748700  | -0.53087700 |
| C                                                         | 4.20905200  | -0.99869800 | -0.26817700 | H | -6.44491700 | 5.88005100  | -0.72787700 |
| H                                                         | 3.49527300  | -1.52778500 | 0.35208200  | C | -6.08068200 | 4.03516300  | 0.32005700  |
| O                                                         | 2.04299200  | 0.14007500  | -1.07404600 | H | -7.07137000 | 4.02315000  | 0.75778900  |
| H                                                         | 3.87231100  | 1.04862300  | -1.27849400 | C | -5.20182100 | 3.00452800  | 0.61241300  |
| C                                                         | 3.19236200  | 1.19037100  | 0.76401400  | C | -4.62744800 | -3.66871400 | 1.06978500  |
| C                                                         | 4.04037800  | 2.26861300  | 1.00944800  | C | -5.31893900 | -4.86097300 | 0.93052400  |
| C                                                         | 2.32669500  | 0.75383800  | 1.76888300  | H | -6.30769700 | -4.95068300 | 1.36353700  |
| C                                                         | 4.02453500  | 2.90860300  | 2.24767300  | C | -4.77302600 | -5.95935400 | 0.23972300  |
| H                                                         | 4.71442100  | 2.60786500  | 0.22844300  | H | -5.35405900 | -6.86961600 | 0.15645900  |
| C                                                         | 2.31423500  | 1.38560400  | 3.00677600  | C | -3.51464900 | -5.90741800 | -0.33706700 |
| H                                                         | 1.66124200  | -0.08197800 | 1.57647100  | H | -4.19120500 | 5.98238500  | -1.77988100 |
| C                                                         | 3.16447200  | 2.46583500  | 3.24816300  | H | -5.46956400 | 2.18360300  | 1.26602500  |
| H                                                         | 4.68421400  | 3.74937300  | 2.42992500  | H | -5.03991600 | -2.81854400 | 1.59895900  |
| H                                                         | 1.64198900  | 1.03968200  | 3.78405200  |   |             |             |             |

|   |             |             |             |
|---|-------------|-------------|-------------|
| H | -3.09204800 | -6.74842400 | -0.87222200 |
| H | -2.74090900 | -0.26958800 | -0.83937100 |

**INT4**

Sum of electronic and thermal Free Energies =  
-996.797456 Hartree

Sum of electronic and thermal free energies + the entropy  
correction at 298.15K = -996.78726 Hartree

|   |             |             |             |
|---|-------------|-------------|-------------|
| C | -2.67661100 | -2.12193000 | 0.02926800  |
| C | -2.21756800 | -0.85937800 | -0.33968200 |
| C | -3.14375100 | 0.11984800  | -0.67070300 |
| C | -4.49938300 | -0.20663600 | -0.60168000 |
| C | -4.92678600 | -1.47970100 | -0.21760700 |
| C | -4.00996700 | -2.47727000 | 0.10553500  |
| C | -0.43568200 | -2.28519400 | 0.09896300  |
| C | -0.71016400 | -0.87515100 | -0.29436900 |
| H | -2.82994100 | 1.10951900  | -0.98056500 |
| H | -5.23745000 | 0.54498000  | -0.85528700 |
| H | -5.98677600 | -1.69887800 | -0.17587800 |
| H | -4.31769600 | -3.47437800 | 0.39530900  |
| H | -1.58209400 | -3.91065600 | 0.56684500  |
| H | 0.53069500  | -2.75126400 | 0.24880000  |
| H | -0.27768700 | -0.70145400 | -1.28675700 |
| N | -1.53437300 | -2.93166200 | 0.28141900  |
| C | -0.06920200 | 0.11980000  | 0.72448200  |
| H | -0.53955500 | -0.08251400 | 1.69116900  |
| C | -0.42585200 | 1.54763200  | 0.34560800  |
| C | -1.21941300 | 2.30814800  | 1.20396300  |
| C | 0.00524700  | 2.11267400  | -0.85677400 |
| C | -1.58070500 | 3.61165200  | 0.86860500  |
| H | -1.56455800 | 1.87412800  | 2.13702600  |
| C | -0.35583800 | 3.41290500  | -1.19479900 |
| H | 0.62211300  | 1.53497200  | -1.53707500 |
| C | -1.15244100 | 4.16596200  | -0.33350000 |
| H | -2.20048100 | 4.18954300  | 1.54491200  |
| H | -0.01633500 | 3.83853200  | -2.13234000 |
| H | -1.43527400 | 5.17816000  | -0.59903700 |
| C | 3.66843200  | -0.45351200 | 0.65553800  |
| C | 2.45668600  | -0.33646900 | -0.07556000 |
| C | 2.51404200  | -0.47948000 | -1.47676200 |
| C | 3.73349200  | -0.71907100 | -2.08489700 |
| C | 4.92073200  | -0.82188400 | -1.33223400 |
| C | 4.90356000  | -0.69212200 | 0.04401600  |
| C | 2.02394700  | -0.10146000 | 2.12543800  |
| C | 1.41213500  | -0.10613800 | 0.89837800  |
| H | 1.62327000  | -0.40647000 | -2.08907400 |

|   |            |             |             |
|---|------------|-------------|-------------|
| H | 3.77822700 | -0.82900900 | -3.16227900 |
| H | 5.85995800 | -1.00704000 | -1.84060400 |
| H | 5.80882700 | -0.77179600 | 0.63514000  |
| H | 4.03675000 | -0.34306000 | 2.74384200  |
| H | 1.58465800 | 0.03417300  | 3.10307800  |
| N | 3.37064400 | -0.30074400 | 1.98506900  |

**Cat1-TS5**

Sum of electronic and thermal Free Energies =  
-2735.45735 Hartree

Sum of electronic and thermal free energies + the entropy  
correction at 298.15K = -2735.44764 Hartree

|   |             |             |             |
|---|-------------|-------------|-------------|
| C | 4.87362800  | 1.88828200  | 1.86606500  |
| C | 4.00247600  | 1.93219600  | 0.77380500  |
| C | 3.41532000  | 3.15090100  | 0.44709200  |
| C | 3.71646700  | 4.26700200  | 1.22372900  |
| C | 4.57788100  | 4.18293300  | 2.32339700  |
| C | 5.17856600  | 2.97751600  | 2.66693700  |
| C | 4.87857300  | -0.18200900 | 1.01091400  |
| C | 3.87719600  | 0.54049700  | 0.23282000  |
| H | 2.74312500  | 3.23587500  | -0.39533600 |
| H | 3.27177800  | 5.22287500  | 0.97128600  |
| H | 4.78597700  | 5.06911800  | 2.91071100  |
| H | 5.85411200  | 2.88890500  | 3.50902100  |
| H | 6.00963500  | 0.24397900  | 2.67360000  |
| H | 5.16479000  | -1.22244000 | 0.92955200  |
| H | 2.89958700  | 0.14093200  | 0.78850200  |
| N | 5.36520800  | 0.56987800  | 1.95584000  |
| C | 3.77499200  | 0.28773100  | -1.29228500 |
| H | 4.45864200  | 0.99917600  | -1.76459300 |
| C | 2.37798300  | 0.59739700  | -1.82889500 |
| C | 2.11777000  | 1.82192400  | -2.44801400 |
| C | 1.34078600  | -0.33366700 | -1.73812500 |
| C | 0.84601800  | 2.12358500  | -2.93336100 |
| H | 2.92029700  | 2.54484200  | -2.55809800 |
| C | 0.07474700  | -0.04421900 | -2.23631100 |
| H | 1.51907500  | -1.29810000 | -1.27910900 |
| C | -0.18275900 | 1.19107600  | -2.82635100 |
| H | 0.66524100  | 3.08112600  | -3.40965100 |
| H | -0.71338800 | -0.78640100 | -2.15703200 |
| H | -1.17101300 | 1.42002900  | -3.21148300 |
| C | 4.60590600  | -3.35101400 | -1.90687100 |
| C | 3.93290100  | -2.38123200 | -1.12226000 |
| C | 3.16974600  | -2.81613000 | -0.02225400 |
| C | 3.08662400  | -4.17068300 | 0.24710600  |
| C | 3.75624800  | -5.11685300 | -0.55675800 |

|   |             |             |             |                                                           |             |             |             |
|---|-------------|-------------|-------------|-----------------------------------------------------------|-------------|-------------|-------------|
| C | 4.52400400  | -4.72188100 | -1.63792500 | H                                                         | -6.23578100 | 4.70615300  | -2.22846900 |
| C | 5.07867300  | -1.33583600 | -2.75247400 | C                                                         | -4.82800900 | 3.53548000  | -1.13195500 |
| C | 4.24954400  | -1.09090700 | -1.68837600 | C                                                         | -5.46571600 | -3.13820600 | -0.28088900 |
| H | 2.65339600  | -2.09821300 | 0.60817900  | C                                                         | -6.04826400 | -4.28495900 | -0.79634400 |
| H | 2.49903800  | -4.51214900 | 1.09230600  | H                                                         | -7.09861200 | -4.27019700 | -1.06053200 |
| H | 3.67106600  | -6.17142200 | -0.32069000 | C                                                         | -5.31025500 | -5.46717600 | -0.98897200 |
| H | 5.04617400  | -5.44273500 | -2.25684600 | H                                                         | -5.80767800 | -6.33764700 | -1.39899000 |
| H | 5.87142100  | -3.11202500 | -3.59706700 | C                                                         | -3.96350100 | -5.54707800 | -0.67248800 |
| H | 5.53667400  | -0.63472400 | -3.43494500 | H                                                         | -2.21512400 | 6.25643600  | -2.30267700 |
| N | 5.29001500  | -2.68353100 | -2.89044100 | H                                                         | -5.53788300 | 2.78516600  | -0.80641600 |
| O | 1.58958400  | -0.18417000 | 1.68349000  | H                                                         | -6.02571400 | -2.22282300 | -0.13328700 |
| H | 1.87844300  | -0.15469100 | 2.60402700  | H                                                         | -3.39315900 | -6.45398400 | -0.82793300 |
| C | -3.02030900 | 0.13145700  | 0.22629900  | H                                                         | -2.34793600 | -0.02455700 | -0.60993100 |
| C | -4.79687000 | 0.54571100  | 2.34920100  | <b>Product</b>                                            |             |             |             |
| C | -3.34636000 | 1.41373000  | 0.64925400  | Sum of electronic and thermal Free Energies =             |             |             |             |
| C | -3.56884300 | -0.93996700 | 0.92115600  | -996.387958 Hartree                                       |             |             |             |
| C | -4.45710900 | -0.74893000 | 1.97291700  | Sum of electronic and thermal free energies + the entropy |             |             |             |
| C | -4.23210800 | 1.63571600  | 1.69687600  | correction at 298.15K =                                   |             |             |             |
| H | -4.86811900 | -1.60775200 | 2.49108300  | C                                                         | -2.92897400 | -1.83059500 | -0.30326200 |
| H | -4.46570100 | 2.65079000  | 1.99667900  | C                                                         | -2.43474200 | -0.65369700 | 0.31008500  |
| C | -1.47251600 | 2.93498900  | 0.03897400  | C                                                         | -3.34009300 | 0.34985000  | 0.69379000  |
| N | -1.32800800 | 4.05795900  | -0.66853900 | C                                                         | -4.69123900 | 0.15515400  | 0.46161700  |
| C | -2.00452100 | -2.85674200 | 0.68109700  | C                                                         | -5.16160100 | -1.02465400 | -0.15166300 |
| N | -2.07910400 | -4.12397100 | 0.26964100  | C                                                         | -4.29290500 | -2.03026800 | -0.54138900 |
| I | 0.01992700  | 1.79374500  | 0.94518000  | C                                                         | -0.69986300 | -2.00647800 | -0.15060300 |
| I | -0.28255300 | -1.80614700 | 1.28758500  | C                                                         | -1.00234700 | -0.78792100 | 0.39619200  |
| C | -0.10823200 | 4.83680300  | -0.85886900 | H                                                         | -2.98488500 | 1.26150100  | 1.16358700  |
| H | 0.02225800  | 5.02711700  | -1.92330300 | H                                                         | -5.40261400 | 0.91963300  | 0.75245700  |
| H | 0.73953600  | 4.27168600  | -0.48077500 | H                                                         | -6.22541000 | -1.14614300 | -0.32161100 |
| H | -0.20024100 | 5.77860000  | -0.31743600 | H                                                         | -4.65170800 | -2.93822000 | -1.01285500 |
| C | -0.96379300 | -5.06621800 | 0.20101500  | H                                                         | -1.88843100 | -3.54617500 | -1.00418100 |
| H | -1.36174700 | -6.07515900 | 0.28546800  | H                                                         | 0.25816200  | -2.48901000 | -0.27410800 |
| H | -0.28640900 | -4.87877000 | 1.03110600  | N                                                         | -1.84987200 | -2.63384700 | -0.57248700 |
| H | -0.44000200 | -4.94760300 | -0.74807700 | C                                                         | -0.06900200 | 0.22665000  | 1.00423000  |
| H | -5.48736600 | 0.70539100  | 3.16755400  | H                                                         | -0.40240300 | 0.40173900  | 2.03453400  |
| C | -3.48422100 | 3.47141200  | -0.77453200 | C                                                         | -0.12517500 | 1.58966500  | 0.30685300  |
| C | -2.56279700 | 4.43065800  | -1.19106700 | C                                                         | 0.29664500  | 2.72059900  | 1.01204300  |
| C | -4.11299500 | -3.22338000 | 0.03711500  | C                                                         | -0.55504800 | 1.74609200  | -1.01037500 |
| C | -3.37952500 | -4.39543000 | -0.14926800 | C                                                         | 0.29383400  | 3.97703300  | 0.41607000  |
| N | -2.76715100 | 2.54879400  | -0.01280300 | H                                                         | 0.63090000  | 2.60972900  | 2.03983900  |
| N | -3.22012800 | -2.28204200 | 0.54937600  | C                                                         | -0.55473000 | 3.00359800  | -1.61368400 |
| C | -2.93484100 | 5.51276000  | -1.98455100 | H                                                         | -0.89537500 | 0.88230300  | -1.57177600 |
| C | -4.27240800 | 5.58191300  | -2.34092600 | C                                                         | -0.13187700 | 4.12264500  | -0.90363600 |
| H | -4.61290100 | 6.40474600  | -2.95758900 | H                                                         | 0.62033800  | 4.84309600  | 0.98107400  |
| C | -5.20090300 | 4.61076900  | -1.92311600 | H                                                         | -0.89067100 | 3.10594000  | -2.63967200 |

|                                                           |             |             |             |                                                           |             |             |             |
|-----------------------------------------------------------|-------------|-------------|-------------|-----------------------------------------------------------|-------------|-------------|-------------|
| H                                                         | -0.13631200 | 5.10074100  | -1.37111500 | C                                                         | 3.03903400  | -3.82234100 | -0.25644300 |
| C                                                         | 3.50290100  | -0.92113700 | 0.61448200  | H                                                         | 2.38178400  | -2.35666300 | -1.69173700 |
| C                                                         | 2.27621800  | -0.53444200 | 0.01830600  | C                                                         | 3.42462100  | -4.05170600 | 1.06513800  |
| C                                                         | 2.18584400  | -0.50430300 | -1.38515000 | H                                                         | 3.74984200  | -3.17351900 | 3.00177800  |
| C                                                         | 3.29637300  | -0.84666500 | -2.13710100 | H                                                         | 3.02094800  | -4.64200000 | -0.96586400 |
| C                                                         | 4.50697500  | -1.22556300 | -1.52020100 | H                                                         | 3.70399300  | -5.05002400 | 1.38227200  |
| C                                                         | 4.62701000  | -1.26965800 | -0.14230200 | C                                                         | -3.46615200 | 0.39608200  | 0.33607700  |
| C                                                         | 2.04881700  | -0.47622000 | 2.25617500  | C                                                         | -4.13066200 | 0.36244900  | 3.05864500  |
| C                                                         | 1.35688200  | -0.25640400 | 1.09507100  | C                                                         | -3.46915400 | 1.56005200  | 1.09411300  |
| H                                                         | 1.25795600  | -0.22322900 | -1.87052900 | C                                                         | -3.76061600 | -0.79030000 | 0.99461500  |
| H                                                         | 3.23808700  | -0.82677900 | -3.21939900 | C                                                         | -4.09833500 | -0.82674900 | 2.34102400  |
| H                                                         | 5.35834100  | -1.48874800 | -2.13758400 | C                                                         | -3.80212300 | 1.56359800  | 2.44206600  |
| H                                                         | 5.55369300  | -1.56291300 | 0.33808300  | H                                                         | -4.32648500 | -1.77397500 | 2.81485800  |
| H                                                         | 4.03799000  | -1.10027300 | 2.66304100  | H                                                         | -3.79759200 | 2.49444400  | 2.99605600  |
| H                                                         | 1.71744200  | -0.37121800 | 3.27906200  | C                                                         | -2.01156100 | 3.14020700  | -0.17020800 |
| N                                                         | 3.33294000  | -0.87638900 | 1.97503900  | N                                                         | -2.15318700 | 4.43221700  | -0.49788900 |
| <b>Cat2-TS1</b>                                           |             |             |             | C                                                         | -2.71438500 | -2.60173500 | -0.36909700 |
| Sum of electronic and thermal Free Energies =             |             |             |             | N                                                         | -3.16831700 | -3.78560300 | -0.80213400 |
| -2096.69834 Hartree                                       |             |             |             | I                                                         | -0.39875800 | 1.86523000  | -0.57047800 |
| Sum of electronic and thermal free energies + the entropy |             |             |             | I                                                         | -0.82699200 | -1.80300400 | -0.64060000 |
| correction at 298.15K =                                   |             |             |             | C                                                         | -1.18558900 | 5.25428400  | -1.22812300 |
| -2096.68853 Hartree                                       |             |             |             | H                                                         | -0.25088500 | 5.28785000  | -0.67098300 |
| C                                                         | 2.29732900  | -0.10120900 | -0.18493600 | H                                                         | -1.60326800 | 6.25435300  | -1.31307800 |
| C                                                         | 5.18779500  | 1.74547700  | 0.14702800  | H                                                         | -1.03040000 | 4.82970000  | -2.21858600 |
| C                                                         | 4.98134100  | 0.43352100  | -0.29910100 | C                                                         | -2.41077000 | -4.78258500 | -1.56331500 |
| C                                                         | 5.81313400  | -0.58157500 | 0.17324200  | H                                                         | -3.05104800 | -5.65157300 | -1.69096100 |
| C                                                         | 6.81822800  | -0.24532500 | 1.07236300  | H                                                         | -1.51887100 | -5.05662300 | -1.00209400 |
| C                                                         | 6.99372800  | 1.07556500  | 1.51289600  | H                                                         | -2.14420200 | -4.36682200 | -2.53369300 |
| C                                                         | 6.17552500  | 2.10087700  | 1.05690200  | H                                                         | -4.39164000 | 0.35039100  | 4.10902600  |
| H                                                         | 7.78448800  | 1.30069000  | 2.21855100  | N                                                         | -3.13300300 | 2.81127200  | 0.47786500  |
| H                                                         | 6.30043600  | 3.12538800  | 1.38597800  | N                                                         | -3.73711700 | -2.03209100 | 0.27408400  |
| H                                                         | 5.67727500  | -1.60686300 | -0.15312200 | H                                                         | -3.26998000 | 0.41768200  | -0.72929400 |
| H                                                         | 7.48039100  | -1.01816300 | 1.44500300  | N                                                         | -4.83247500 | -2.83512800 | 0.27517400  |
| C                                                         | 3.48281000  | 1.83472800  | -1.30129200 | N                                                         | -3.98029000 | 3.86814900  | 0.58648100  |
| N                                                         | 4.24125800  | 2.55603500  | -0.49953600 | C                                                         | -4.46476200 | -3.88991200 | -0.38675300 |
| H                                                         | 2.69920000  | 2.29357200  | -1.88814200 | H                                                         | -5.08209300 | -4.74944500 | -0.59657900 |
| H                                                         | 4.13839800  | 3.55619300  | -0.35245000 | C                                                         | -3.36445700 | 4.83894200  | -0.01626900 |
| C                                                         | 3.79544400  | 0.44833200  | -1.16653600 | H                                                         | -3.73925300 | 5.84331600  | -0.13703500 |
| H                                                         | 3.66790000  | -0.22704700 | -2.00303000 | <b>Cat2-INT1</b>                                          |             |             |             |
| O                                                         | 1.24921000  | -0.01640200 | -0.95721800 | Sum of electronic and thermal Free Energies =             |             |             |             |
| H                                                         | 2.36737800  | 0.61004200  | 0.65329700  | -2096.70070 Hartree                                       |             |             |             |
| C                                                         | 2.70928900  | -1.48395000 | 0.24522600  | Sum of electronic and thermal free energies + the entropy |             |             |             |
| C                                                         | 3.09881500  | -1.71439200 | 1.56276100  | correction at 298.15K =                                   |             |             |             |
| C                                                         | 2.67978300  | -2.54306800 | -0.66420600 | -2096.69089 Hartree                                       |             |             |             |
| C                                                         | 3.45184900  | -2.99834400 | 1.97431200  | C                                                         | 2.31652700  | -0.20470000 | -0.13287200 |
| H                                                         | 3.12573900  | -0.88713700 | 2.26561600  | C                                                         | 5.38416600  | 1.47634400  | 0.00044600  |

|   |             |             |             |                                                           |             |             |             |
|---|-------------|-------------|-------------|-----------------------------------------------------------|-------------|-------------|-------------|
| C | 4.90051500  | 0.17229800  | -0.09754300 | H                                                         | 0.16645500  | 5.25542500  | -0.54861700 |
| C | 5.59105900  | -0.84831400 | 0.54303400  | C                                                         | -2.60118800 | -4.60640100 | -1.66563200 |
| C | 6.73999100  | -0.51667100 | 1.26172100  | H                                                         | -3.27911000 | -5.44398400 | -1.80810800 |
| C | 7.19414000  | 0.80245500  | 1.34646000  | H                                                         | -1.72668600 | -4.92715600 | -1.10167400 |
| C | 6.51654000  | 1.83742000  | 0.70741000  | H                                                         | -2.30782400 | -4.19264300 | -2.62916600 |
| H | 8.08951300  | 1.02487000  | 1.91424300  | H                                                         | -4.45674700 | 0.56070400  | 4.02896100  |
| H | 6.85437100  | 2.86523300  | 0.75552500  | N                                                         | -2.90962900 | 2.98039900  | 0.48222100  |
| H | 5.25317300  | -1.87631900 | 0.48395900  | N                                                         | -3.80905900 | -1.81612000 | 0.18943200  |
| H | 7.29405000  | -1.29998100 | 1.76532600  | H                                                         | -3.15087800 | 0.61259100  | -0.76146800 |
| C | 3.55507700  | 1.62723900  | -1.29407100 | N                                                         | -4.94528000 | -2.56115400 | 0.16612400  |
| N | 4.51294800  | 2.30640700  | -0.75423100 | N                                                         | -3.69112900 | 4.08972700  | 0.58802100  |
| H | 2.80309700  | 2.10269300  | -1.91046500 | C                                                         | -4.62335800 | -3.62563900 | -0.50365100 |
| H | 4.63276600  | 3.31402600  | -0.85823800 | H                                                         | -5.28192400 | -4.44873600 | -0.73263100 |
| C | 3.64111700  | 0.20126300  | -0.91503000 | C                                                         | -2.99416500 | 5.02644200  | 0.02154900  |
| H | 3.66535600  | -0.42837600 | -1.81022400 | H                                                         | -3.29868200 | 6.05518700  | -0.09149300 |
| O | 1.22570900  | -0.02794500 | -0.95085100 | <b>Cat2-TS2</b>                                           |             |             |             |
| H | 2.28564700  | 0.43602900  | 0.76500400  | Sum of electronic and thermal Free Energies =             |             |             |             |
| C | 2.45885000  | -1.64332200 | 0.33328400  | -2096.66685 Hartree                                       |             |             |             |
| C | 2.43494400  | -1.95570000 | 1.69030500  | Sum of electronic and thermal free energies + the entropy |             |             |             |
| C | 2.57238700  | -2.67310500 | -0.60392400 | correction at 298.15K = -2096.65704 Hartree               |             |             |             |
| C | 2.52163700  | -3.28253500 | 2.11091900  | C                                                         | 2.16065500  | -2.01366700 | -0.31639700 |
| H | 2.34665600  | -1.15809800 | 2.42165900  | O                                                         | 1.00605800  | -1.22017900 | -0.59233500 |
| C | 2.66342100  | -3.99650300 | -0.18760500 | H                                                         | 1.98873500  | -3.05468000 | -0.62097000 |
| H | 2.58341600  | -2.43719600 | -1.66395400 | C                                                         | 2.61550200  | -1.99366500 | 1.12595900  |
| C | 2.63730800  | -4.30403300 | 1.17301100  | C                                                         | 1.76976800  | -1.54980000 | 2.13944400  |
| H | 2.49952400  | -3.51603200 | 3.16946600  | C                                                         | 3.89756300  | -2.44209300 | 1.45469200  |
| H | 2.75392100  | -4.78960800 | -0.92146900 | C                                                         | 2.20243100  | -1.54251200 | 3.46555900  |
| H | 2.70766200  | -5.33582700 | 1.49818000  | H                                                         | 0.77056800  | -1.20942200 | 1.89463300  |
| C | -3.38973200 | 0.59111300  | 0.29471100  | C                                                         | 4.32982300  | -2.43606500 | 2.77560900  |
| C | -4.15594800 | 0.56827900  | 2.98922100  | H                                                         | 4.56310600  | -2.78579500 | 0.66790900  |
| C | -3.34772300 | 1.74583000  | 1.06653800  | C                                                         | 3.48275200  | -1.98103700 | 3.78612900  |
| C | -3.78089300 | -0.58302100 | 0.92496200  | H                                                         | 1.53652100  | -1.19162600 | 4.24601400  |
| C | -4.16983000 | -0.61289600 | 2.25781000  | H                                                         | 5.32941100  | -2.77906200 | 3.01763200  |
| C | -3.73087700 | 1.75354700  | 2.40124000  | H                                                         | 3.82126600  | -1.96997700 | 4.81579900  |
| H | -4.47310900 | -1.54941700 | 2.71017300  | C                                                         | 4.90148800  | -0.18461800 | -2.18414500 |
| H | -3.68915400 | 2.67635900  | 2.96720000  | C                                                         | 4.07466400  | -0.26413200 | -1.05456600 |
| C | -1.74664800 | 3.23979800  | -0.12603700 | C                                                         | 4.23913000  | 0.66438500  | -0.02409300 |
| N | -1.79833100 | 4.54556800  | -0.43073400 | C                                                         | 5.21552600  | 1.64145800  | -0.17033900 |
| C | -2.80665400 | -2.43037200 | -0.44651100 | C                                                         | 6.01952800  | 1.70884000  | -1.31919400 |
| N | -3.31720900 | -3.58375000 | -0.89945800 | C                                                         | 5.87530100  | 0.79321400  | -2.35154300 |
| I | -0.19882300 | 1.81712800  | -0.53065900 | C                                                         | 3.56590900  | -1.94996500 | -2.52873600 |
| I | -0.87299600 | -1.71595900 | -0.68219700 | C                                                         | 3.13970200  | -1.37530100 | -1.29870600 |
| C | -0.75740000 | 5.30778700  | -1.12199900 | H                                                         | 3.62963000  | 0.62093100  | 0.87153600  |
| H | -1.09308700 | 6.33947700  | -1.19070100 | H                                                         | 5.36372400  | 2.36677600  | 0.62117400  |
| H | -0.61345500 | 4.89523600  | -2.11943300 | H                                                         | 6.76914200  | 2.48703200  | -1.39937600 |

|                                                           |             |             |             |   |             |             |             |
|-----------------------------------------------------------|-------------|-------------|-------------|---|-------------|-------------|-------------|
| H                                                         | 6.48934300  | 0.83020000  | -3.24325700 | C | 5.56369300  | -0.70595200 | 0.59785600  |
| H                                                         | 4.96077000  | -1.39335500 | -3.95680700 | C | 6.91301900  | -0.63430700 | 0.91709000  |
| H                                                         | 3.15638000  | -2.80657800 | -3.04697900 | C | 7.61677000  | 0.57962100  | 0.88581800  |
| H                                                         | 2.00916300  | -0.87319800 | -1.60585800 | C | 6.97985800  | 1.76003000  | 0.53778000  |
| N                                                         | 4.54640600  | -1.23256700 | -3.04333300 | H | 8.67089600  | 0.59385600  | 1.13569600  |
| C                                                         | -3.16580700 | 1.15503500  | 0.16217300  | H | 7.50261000  | 2.70820500  | 0.50164600  |
| C                                                         | -4.51662400 | 2.21217600  | -2.05387200 | H | 5.05405100  | -1.66068300 | 0.61896800  |
| C                                                         | -4.07402500 | 0.39270900  | -0.56168900 | H | 7.43802000  | -1.54117200 | 1.19405400  |
| C                                                         | -2.92268900 | 2.44732200  | -0.28462300 | C | 3.53848300  | 2.22138900  | -0.33943600 |
| C                                                         | -3.58614800 | 2.99068600  | -1.37678300 | N | 4.75013400  | 2.69778700  | -0.13140500 |
| C                                                         | -4.75717100 | 0.90203700  | -1.65800600 | H | 2.72889400  | 2.87779900  | -0.63114400 |
| H                                                         | -3.37037700 | 4.00549400  | -1.68862900 | H | 5.01846300  | 3.66985400  | -0.25496400 |
| H                                                         | -5.46193600 | 0.27564000  | -2.19159900 | C | 3.52121100  | 0.80183600  | -0.19997600 |
| C                                                         | -3.47980000 | -1.97779800 | -0.05859600 | H | 3.46771100  | 0.54384000  | -1.48349600 |
| N                                                         | -4.22434100 | -3.04218100 | 0.27329400  | O | 1.23558600  | 0.20983600  | -0.80888200 |
| C                                                         | -0.67242800 | 3.04472600  | 0.61965400  | H | 1.82813800  | 0.60170500  | 1.11867100  |
| N                                                         | -0.20581900 | 4.13729300  | 1.23900600  | C | 2.45610900  | -1.35241200 | 0.58258000  |
| I                                                         | -1.40297000 | -1.87024500 | -0.34065700 | C | 2.51620700  | -1.73396100 | 1.92118700  |
| I                                                         | 0.37064900  | 1.32996600  | 0.11707700  | C | 2.65051100  | -2.31377800 | -0.41197900 |
| C                                                         | -3.73405100 | -4.40115100 | 0.51508000  | C | 2.77761400  | -3.05812200 | 2.26769800  |
| H                                                         | -4.59388600 | -5.02448400 | 0.74767300  | H | 2.36165700  | -0.98920300 | 2.69598200  |
| H                                                         | -3.04454900 | -4.38874000 | 1.35777800  | C | 2.91141900  | -3.63647000 | -0.06841500 |
| H                                                         | -3.23926000 | -4.76905300 | -0.38217300 | H | 2.60354700  | -2.02834400 | -1.45814700 |
| C                                                         | 1.17044600  | 4.36051500  | 1.69132000  | C | 2.97812400  | -4.01131800 | 1.27287700  |
| H                                                         | 1.21993800  | 5.36356300  | 2.10727700  | H | 2.82138700  | -3.34468000 | 3.31241800  |
| H                                                         | 1.84459300  | 4.27811600  | 0.84010300  | H | 3.06393000  | -4.37582800 | -0.84672100 |
| H                                                         | 1.42012800  | 3.62643300  | 2.45580500  | H | 3.18148100  | -5.04214900 | 1.53984200  |
| H                                                         | -5.04176400 | 2.62180100  | -2.90713900 | O | 2.82395700  | 0.11496800  | -2.61510800 |
| N                                                         | -4.34130000 | -0.96159600 | -0.16945600 | H | 2.77210000  | 0.82736200  | -3.26534800 |
| N                                                         | -1.97046800 | 3.27346700  | 0.40368400  | H | 1.94736700  | 0.14172500  | -1.97223300 |
| H                                                         | -2.68642700 | 0.76672100  | 1.05295400  | C | -3.58949700 | 0.29299000  | 0.29652500  |
| N                                                         | -2.34071800 | 4.49937700  | 0.85602300  | C | -4.36050300 | 0.14273700  | 2.98542800  |
| N                                                         | -5.62069900 | -1.35673500 | 0.06615700  | C | -3.68151700 | 1.43179900  | 1.08570000  |
| C                                                         | -1.25555300 | 5.00233000  | 1.36127300  | C | -3.85270200 | -0.92572700 | 0.90659400  |
| H                                                         | -1.16769300 | 5.97201200  | 1.82566400  | C | -4.24167600 | -1.02145600 | 2.23583600  |
| C                                                         | -5.52269900 | -2.62254400 | 0.33578700  | C | -4.06833200 | 1.37746900  | 2.41804600  |
| H                                                         | -6.34254200 | -3.27841700 | 0.58327900  | H | -4.44352000 | -1.99326800 | 2.67036800  |
| <b>Cat2-TS2'</b>                                          |             |             |             | H | -4.13305500 | 2.29008100  | 2.99804200  |
| Sum of electronic and thermal Free Energies =             |             |             |             | C | -2.26481300 | 3.10690500  | -0.09694200 |
| -2173.10208 Hartree                                       |             |             |             | N | -2.46190600 | 4.39550100  | -0.41005900 |
| Sum of electronic and thermal free energies + the entropy |             |             |             | C | -2.68237800 | -2.62362100 | -0.49820600 |
| correction at 298.15K =                                   |             |             |             | N | -3.07449800 | -3.79134700 | -1.02521100 |
|                                                           |             |             |             |   |             |             |             |
| C                                                         | 2.19423800  | 0.09642400  | 0.21514800  | I | -0.56904000 | 1.92812800  | -0.46112800 |
| C                                                         | 5.62484000  | 1.67222000  | 0.23747900  | I | -0.81362500 | -1.75809700 | -0.62945300 |
| C                                                         | 4.89200700  | 0.47368800  | 0.25153400  | C | -1.51471400 | 5.27367000  | -1.10111800 |

|                                                           |             |             |             |                                                           |             |             |             |
|-----------------------------------------------------------|-------------|-------------|-------------|-----------------------------------------------------------|-------------|-------------|-------------|
| H                                                         | -1.99399500 | 6.24121800  | -1.22742300 | H                                                         | 4.91166800  | 1.44362300  | 2.16012200  |
| H                                                         | -1.27714100 | 4.84680000  | -2.07412400 | H                                                         | 6.46083900  | 2.55898300  | 0.59145600  |
| H                                                         | -0.61561300 | 5.37931600  | -0.49621000 | H                                                         | 6.54857400  | 1.88288600  | -1.79995900 |
| C                                                         | -2.25542400 | -4.70016900 | -1.83194200 | H                                                         | 5.39450800  | 0.07492300  | -3.59592700 |
| H                                                         | -1.39068300 | -5.01439400 | -1.24961400 | H                                                         | 3.63932900  | -1.71148700 | -3.60751200 |
| H                                                         | -1.94436800 | -4.18740300 | -2.74080400 | H                                                         | 0.91469800  | -1.19195000 | -2.12116900 |
| H                                                         | -2.86972200 | -5.56202600 | -2.08068000 | N                                                         | 4.85927400  | -0.17384200 | -2.77522400 |
| H                                                         | -4.66295600 | 0.08577300  | 4.02313500  | C                                                         | -2.91765100 | 1.49428400  | 0.33837600  |
| N                                                         | -3.38615000 | 2.71340800  | 0.51394100  | C                                                         | -4.21665500 | 2.89621700  | -1.71435900 |
| N                                                         | -3.74759600 | -2.13502100 | 0.14110500  | C                                                         | -3.98675900 | 0.94275700  | -0.35344400 |
| H                                                         | -3.35142900 | 0.35540500  | -0.75866900 | C                                                         | -2.49851400 | 2.75793700  | -0.05497000 |
| C                                                         | -4.37912200 | -3.97011100 | -0.66449100 | C                                                         | -3.13112000 | 3.47090300  | -1.06392800 |
| H                                                         | -4.95532400 | -4.83576900 | -0.95200000 | C                                                         | -4.64657000 | 1.62060400  | -1.36942800 |
| C                                                         | -3.70441200 | 4.73476300  | 0.04376600  | H                                                         | -2.77229100 | 4.45734700  | -1.33242000 |
| H                                                         | -4.12514200 | 5.72121400  | -0.07347600 | H                                                         | -5.48068700 | 1.15127500  | -1.87708100 |
| N                                                         | -4.81031300 | -2.97525400 | 0.05005700  | C                                                         | -3.80408400 | -1.52112600 | -0.00311500 |
| N                                                         | -4.28774000 | 3.72518900  | 0.61447600  | N                                                         | -4.67654100 | -2.45054600 | 0.40602700  |
| <b>Cat2-INT2</b>                                          |             |             |             | C                                                         | -0.13128000 | 2.93137600  | 0.70086200  |
| Sum of electronic and thermal Free Energies =             |             |             |             | N                                                         | 0.54221600  | 3.85983700  | 1.39085800  |
| -2096.73867 Hartree                                       |             |             |             | I                                                         | -1.85158800 | -1.83133400 | -0.55538400 |
| Sum of electronic and thermal free energies + the entropy |             |             |             | I                                                         | 0.63687400  | 1.19773300  | -0.08622100 |
| correction at 298.15K =                                   |             |             |             | C                                                         | -4.41930400 | -3.88592100 | 0.55903800  |
| -2096.72883 Hartree                                       |             |             |             | H                                                         | -5.33089800 | -4.34196000 | 0.93651200  |
| C                                                         | 2.25770700  | -2.13897800 | -1.06588800 | H                                                         | -3.60893200 | -4.02727700 | 1.27221600  |
| O                                                         | 0.99005600  | -1.44653500 | -1.18875000 | H                                                         | -4.16412800 | -4.31003900 | -0.41082300 |
| H                                                         | 2.23726900  | -2.98631700 | -1.75872500 | C                                                         | 1.96400500  | 3.81586800  | 1.74707200  |
| C                                                         | 2.38811300  | -2.67393700 | 0.34386000  | H                                                         | 2.18524800  | 4.71389700  | 2.31810800  |
| C                                                         | 1.49659200  | -2.34699800 | 1.36169200  | H                                                         | 2.56016300  | 3.79427200  | 0.83587000  |
| C                                                         | 3.47628600  | -3.50184800 | 0.63260400  | H                                                         | 2.15091100  | 2.93099000  | 2.35383600  |
| C                                                         | 1.69262700  | -2.83356100 | 2.65465700  | H                                                         | -4.71974600 | 3.43875600  | -2.50425000 |
| H                                                         | 0.65340600  | -1.69718600 | 1.16537000  | N                                                         | -4.46118800 | -0.36138300 | 0.01236100  |
| C                                                         | 3.67179200  | -3.98790300 | 1.91906200  | N                                                         | -1.38676100 | 3.37031500  | 0.61386300  |
| H                                                         | 4.17559900  | -3.75835300 | -0.15741000 | H                                                         | -2.45664300 | 0.97621700  | 1.17225500  |
| C                                                         | 2.77970100  | -3.65185600 | 2.93755700  | N                                                         | -1.53058900 | 4.57601000  | 1.21971200  |
| H                                                         | 0.99325000  | -2.56606700 | 3.43868000  | N                                                         | -5.74784900 | -0.52970300 | 0.40812400  |
| H                                                         | 4.52091400  | -4.62813800 | 2.12936100  | C                                                         | -0.34913400 | 4.85162000  | 1.68505500  |
| H                                                         | 2.93288100  | -4.02830700 | 3.94236000  | H                                                         | -0.08098200 | 5.73782200  | 2.23906400  |
| C                                                         | 5.00501100  | 0.38858700  | -1.52984900 | C                                                         | -5.85478200 | -1.80274900 | 0.64309900  |
| C                                                         | 4.09489700  | -0.25739000 | -0.65658900 | H                                                         | -6.74402900 | -2.30858200 | 0.98584000  |
| C                                                         | 4.07214500  | 0.13192900  | 0.69690000  | <b>Cat2-TS3</b>                                           |             |             |             |
| C                                                         | 4.92212700  | 1.13855400  | 1.11987300  | Sum of electronic and thermal Free Energies =             |             |             |             |
| C                                                         | 5.80837500  | 1.77430600  | 0.22600700  | -2096.69404 Hartree                                       |             |             |             |
| C                                                         | 5.86500500  | 1.40699800  | -1.10616500 | Sum of electronic and thermal free energies + the entropy |             |             |             |
| C                                                         | 3.89808800  | -1.14291500 | -2.72577200 | correction at 298.15K =                                   |             |             |             |
| C                                                         | 3.38781200  | -1.23366000 | -1.45444900 | -2096.68417 Hartree                                       |             |             |             |
| H                                                         | 3.40196200  | -0.34562900 | 1.40271400  | C                                                         | 2.63365100  | -2.21950300 | 0.69023000  |



|   |             |             |             |                                                           |             |             |             |
|---|-------------|-------------|-------------|-----------------------------------------------------------|-------------|-------------|-------------|
| O | 0.82937700  | -1.58223700 | -0.56123200 | H                                                         | -3.61463700 | -4.02498200 | 1.42816000  |
| H | 2.18836500  | -3.20808100 | 0.65094500  | H                                                         | -3.90739900 | -4.46979400 | -0.28195700 |
| C | 2.25411000  | -1.41574100 | 1.84313900  | C                                                         | 1.93490300  | 3.86596000  | 1.14219300  |
| C | 0.99569200  | -1.63882300 | 2.42240900  | H                                                         | 2.16258900  | 4.83548700  | 1.57840400  |
| C | 3.11800300  | -0.47851900 | 2.42120600  | H                                                         | 2.55077200  | 3.70044300  | 0.25945700  |
| C | 0.57726200  | -0.88320400 | 3.50524400  | H                                                         | 2.09615000  | 3.07908700  | 1.87827100  |
| H | 0.34734400  | -2.39356800 | 1.99247700  | H                                                         | -4.68799600 | 3.01477000  | -3.11867700 |
| C | 2.70239200  | 0.26857400  | 3.51755800  | N                                                         | -4.42503400 | -0.53504200 | -0.26154500 |
| H | 4.12401200  | -0.35820500 | 2.04000300  | N                                                         | -1.39376000 | 3.29101900  | 0.02745400  |
| C | 1.42704600  | 0.08379300  | 4.04551900  | H                                                         | -2.47260700 | 0.95797000  | 0.81945900  |
| H | -0.40488700 | -1.04584300 | 3.93367100  | C                                                         | -0.35238200 | 4.91696500  | 0.85649300  |
| H | 3.37682000  | 0.99022500  | 3.96333900  | H                                                         | -0.07916400 | 5.87906400  | 1.26071800  |
| H | 1.10224900  | 0.67608600  | 4.89349300  | C                                                         | -5.83203500 | -1.97136900 | 0.34584300  |
| C | 5.36327600  | -1.32157600 | -1.60133400 | H                                                         | -6.73590100 | -2.48252500 | 0.63859600  |
| C | 4.45964600  | -0.84476400 | -0.63190900 | N                                                         | -1.52873700 | 4.58715700  | 0.41752100  |
| C | 4.43482800  | 0.53323700  | -0.37981200 | N                                                         | -5.74465200 | -0.72043900 | 0.01167900  |
| C | 5.31827100  | 1.35735000  | -1.06321400 | <b>Cat2-INT3</b>                                          |             |             |             |
| C | 6.22871600  | 0.84352700  | -1.99840000 | Sum of electronic and thermal Free Energies =             |             |             |             |
| C | 6.26009900  | -0.51202000 | -2.28784900 | -2096.69768 Hartree                                       |             |             |             |
| C | 4.16499300  | -3.09478700 | -0.96298600 | Sum of electronic and thermal free energies + the entropy |             |             |             |
| C | 3.68639200  | -2.00994900 | -0.19463900 | correction at 298.15K = -2096.68778 Hartree               |             |             |             |
| H | 3.74139700  | 0.96467700  | 0.32995800  | C                                                         | 2.71520300  | -2.39270600 | 0.80464500  |
| H | 5.30417600  | 2.42337600  | -0.86856000 | O                                                         | 0.52642500  | -1.71953100 | -0.97644100 |
| H | 6.90878300  | 1.51532200  | -2.50828800 | H                                                         | 2.28265900  | -3.37504500 | 0.62990200  |
| H | 6.94025500  | -0.92819700 | -3.02131300 | C                                                         | 2.07297400  | -1.61545500 | 1.83972100  |
| H | 5.67180300  | -3.29638800 | -2.37901600 | C                                                         | 0.72639400  | -1.89735300 | 2.12030900  |
| H | 3.83587300  | -4.12430700 | -0.93913400 | C                                                         | 2.73425200  | -0.61487900 | 2.56808300  |
| H | 1.15732900  | -1.79784200 | -1.44332400 | C                                                         | 0.02784700  | -1.13018300 | 3.03961100  |
| N | 5.15119100  | -2.69434100 | -1.74887800 | H                                                         | 0.23438600  | -2.69579200 | 1.57774900  |
| C | -2.92506200 | 1.38589700  | -0.06656500 | C                                                         | 2.03876300  | 0.13362000  | 3.50636300  |
| C | -4.19416100 | 2.55893300  | -2.27014200 | H                                                         | 3.79624000  | -0.45714000 | 2.42924200  |
| C | -3.97032900 | 0.74659500  | -0.72170000 | C                                                         | 0.68090400  | -0.10524700 | 3.72346900  |
| C | -2.50127800 | 2.60660000  | -0.57789200 | H                                                         | -1.02042100 | -1.33128800 | 3.22868700  |
| C | -3.12348200 | 3.20592900  | -1.66505000 | H                                                         | 2.55300600  | 0.89945500  | 4.07503900  |
| C | -4.61536200 | 1.31667000  | -1.81152700 | H                                                         | 0.13842100  | 0.49294100  | 4.44694500  |
| H | -2.76692700 | 4.16102400  | -2.03120000 | C                                                         | 5.52957600  | -1.26088400 | -1.24516200 |
| H | -5.43079000 | 0.78962600  | -2.29190900 | C                                                         | 4.57632800  | -0.87336100 | -0.28769500 |
| C | -3.72214200 | -1.66338500 | -0.11049500 | C                                                         | 4.52420400  | 0.47535800  | 0.07247800  |
| N | -4.61272400 | -2.58387900 | 0.28736600  | C                                                         | 5.43215600  | 1.35972000  | -0.49917300 |
| C | -0.14668500 | 2.84553400  | 0.21184800  | C                                                         | 6.39083000  | 0.93061800  | -1.42432000 |
| N | 0.52360700  | 3.87394000  | 0.75086300  | C                                                         | 6.44897600  | -0.39915900 | -1.82167500 |
| I | -1.63965300 | -1.87687300 | -0.38902300 | C                                                         | 4.33218700  | -3.10147000 | -0.82923300 |
| I | 0.55081200  | 0.90986900  | -0.19815200 | C                                                         | 3.78861800  | -2.07930700 | 0.01257400  |
| C | -4.32102900 | -3.98437800 | 0.60028600  | H                                                         | 3.78980500  | 0.84316700  | 0.77413000  |
| H | -5.25531500 | -4.46253900 | 0.88463800  | H                                                         | 5.39396300  | 2.40622800  | -0.21961300 |

|                                                           |             |             |             |   |             |             |             |
|-----------------------------------------------------------|-------------|-------------|-------------|---|-------------|-------------|-------------|
| H                                                         | 7.08823600  | 1.64481600  | -1.84510400 | C | 5.54929000  | -0.63785000 | 0.21616500  |
| H                                                         | 7.16534900  | -0.75135200 | -2.55380900 | C | 6.04308500  | -0.22900900 | 1.45407800  |
| H                                                         | 5.89633900  | -3.16397700 | -2.17845200 | C | 7.38347900  | 0.12920500  | 1.54301200  |
| H                                                         | 4.01380400  | -4.13221900 | -0.90784000 | C | 8.22475100  | 0.09693500  | 0.42053800  |
| H                                                         | 0.80041900  | -1.96630400 | -1.86692900 | C | 7.75266500  | -0.30787900 | -0.82176100 |
| N                                                         | 5.33820500  | -2.62629500 | -1.51967900 | H | 9.26288000  | 0.38928600  | 0.52457200  |
| C                                                         | -2.74711500 | 1.51987700  | 0.09791100  | H | 8.39084200  | -0.34035500 | -1.69654200 |
| C                                                         | -4.10601000 | 2.98608200  | -1.86476500 | H | 5.39618300  | -0.18938200 | 2.32361200  |
| C                                                         | -3.91874400 | 1.04152700  | -0.47749400 | H | 7.78876400  | 0.44442900  | 2.49744000  |
| C                                                         | -2.24852600 | 2.72786100  | -0.37582100 | C | 4.42713900  | -1.39274900 | -1.62621000 |
| C                                                         | -2.91333200 | 3.47121900  | -1.34245300 | N | 5.67092100  | -1.14481100 | -1.97955500 |
| C                                                         | -4.60766500 | 1.75978200  | -1.44677700 | H | 3.70357600  | -1.74488600 | -2.34800200 |
| H                                                         | -2.49501200 | 4.41108800  | -1.68158200 | H | 6.03279900  | -1.24346200 | -2.92384800 |
| H                                                         | -5.51954800 | 1.35484300  | -1.86865700 | C | 4.20905200  | -0.99869800 | -0.26817700 |
| C                                                         | -3.87871700 | -1.42913300 | -0.10798200 | H | 3.49527300  | -1.52778500 | 0.35208200  |
| N                                                         | -4.83106400 | -2.28649000 | 0.29106800  | O | 2.04299200  | 0.14007500  | -1.07404600 |
| C                                                         | 0.19597600  | 2.67935700  | 0.13685100  | H | 3.87231100  | 1.04862300  | -1.27849400 |
| N                                                         | 1.02135500  | 3.60264300  | 0.65303000  | C | 3.19236200  | 1.19037100  | 0.76401400  |
| I                                                         | -1.83280900 | -1.80198800 | -0.61960300 | C | 4.04037800  | 2.26861300  | 1.00944800  |
| I                                                         | 0.62068400  | 0.70098800  | -0.47485500 | C | 2.32669500  | 0.75383800  | 1.76888300  |
| C                                                         | -4.67483400 | -3.73535500 | 0.43105800  | C | 4.02453500  | 2.90860300  | 2.24767300  |
| H                                                         | -5.64268200 | -4.15041200 | 0.70260400  | H | 4.71442100  | 2.60786500  | 0.22844300  |
| H                                                         | -3.94675300 | -3.94396000 | 1.21342500  | C | 2.31423500  | 1.38560400  | 3.00677600  |
| H                                                         | -4.34587000 | -4.15296100 | -0.51885900 | H | 1.66124200  | -0.08197800 | 1.57647100  |
| C                                                         | 2.45925500  | 3.44193300  | 0.87647500  | C | 3.16447200  | 2.46583500  | 3.24816300  |
| H                                                         | 2.85829300  | 4.40625400  | 1.18237900  | H | 4.68421400  | 3.74937300  | 2.42992500  |
| H                                                         | 2.93172700  | 3.12158200  | -0.05104300 | H | 1.64198900  | 1.03968200  | 3.78405200  |
| H                                                         | 2.61816100  | 2.70415400  | 1.66299000  | H | 3.15276700  | 2.96021800  | 4.21287200  |
| H                                                         | -4.63371100 | 3.55476100  | -2.61973000 | C | -2.68767900 | -0.18871000 | 0.24075200  |
| N                                                         | -4.46160600 | -0.22413500 | -0.07080900 | C | -2.61088500 | 0.01784200  | 3.03263000  |
| N                                                         | -1.01476100 | 3.25026500  | 0.14170500  | C | -2.74893500 | 1.04713700  | 0.87192500  |
| H                                                         | -2.24979800 | 0.98142400  | 0.89554700  | C | -2.54056900 | -1.31439000 | 1.04073100  |
| C                                                         | 0.27069700  | 4.70749800  | 0.93926100  | C | -2.50709200 | -1.22953100 | 2.42740300  |
| H                                                         | 0.68405900  | 5.60697000  | 1.36759600  | C | -2.71885500 | 1.16604500  | 2.25589100  |
| C                                                         | -5.96116300 | -1.56067600 | 0.54101800  | H | -2.39167200 | -2.13118700 | 3.01779400  |
| H                                                         | -6.88550800 | -2.00305700 | 0.87789700  | H | -2.76824900 | 2.14835000  | 2.71116100  |
| N                                                         | -0.97562900 | 4.51970300  | 0.63101100  | C | -1.85250500 | 2.76042800  | -0.68670400 |
| N                                                         | -5.76343900 | -0.29721100 | 0.32247500  | N | -2.28322900 | 3.89290400  | -1.24257800 |
| <b>TS4</b>                                                |             |             |             | C | -1.33856500 | -3.05996700 | -0.25634900 |
| Sum of electronic and thermal Free Energies =             |             |             |             | N | -1.55779900 | -4.31851200 | -0.63590300 |
| -996.77109 Hartree                                        |             |             |             | I | -0.00172800 | 1.83114800  | -0.90404800 |
| Sum of electronic and thermal free energies + the entropy |             |             |             | I | 0.32560200  | -1.87786700 | -0.63410600 |
| correction at 298.15K =                                   |             |             |             | C | -1.55574100 | 4.77824200  | -2.14810500 |
|                                                           |             |             |             | H | -1.52126200 | 5.77448800  | -1.70880900 |
| C                                                         | 3.19392500  | 0.52153400  | -0.58954800 | H | -1.52126200 | 5.77448800  | -1.70880900 |
| C                                                         | 6.41516200  | -0.67619600 | -0.88382900 | H | -2.07575600 | 4.80644200  | -3.10509800 |

|   |             |             |             |   |             |             |             |
|---|-------------|-------------|-------------|---|-------------|-------------|-------------|
| H | -0.54578000 | 4.40163600  | -2.28612900 | H | -4.31769600 | -3.47437800 | 0.39530900  |
| C | -0.67291900 | -5.17475800 | -1.42288500 | H | -1.58209400 | -3.91065600 | 0.56684500  |
| H | -1.04179600 | -5.22751200 | -2.44703100 | H | 0.53069500  | -2.75126400 | 0.24880000  |
| H | -0.66823800 | -6.16594600 | -0.97255200 | H | -0.27768700 | -0.70145400 | -1.28675700 |
| H | 0.33361500  | -4.76481300 | -1.40603800 | N | -1.53437300 | -2.93166200 | 0.28141900  |
| H | -2.58408200 | 0.09755400  | 4.11188900  | C | -0.06920200 | 0.11980000  | 0.72448200  |
| C | -3.94575500 | 3.08212100  | 0.01759200  | H | -0.53955500 | -0.08251400 | 1.69116900  |
| C | -3.59009900 | 4.13229300  | -0.82654200 | C | -0.42585200 | 1.54763200  | 0.34560800  |
| C | -3.36318400 | -3.62158000 | 0.48886700  | C | -1.21941300 | 2.30814800  | 1.20396300  |
| C | -2.81910600 | -4.70888200 | -0.19287100 | C | 0.00524700  | 2.11267400  | -0.85677400 |
| N | -2.83627200 | 2.24004100  | 0.07797900  | C | -1.58070500 | 3.61165200  | 0.86860500  |
| N | -2.41115700 | -2.60548900 | 0.42483700  | H | -1.56455800 | 1.87412800  | 2.13702600  |
| C | -4.47174200 | 5.16876900  | -1.12280300 | C | -0.35583800 | 3.41290500  | -1.19479900 |
| C | -5.72250600 | 5.09748700  | -0.53087700 | H | 0.62211300  | 1.53497200  | -1.53707500 |
| H | -6.44491700 | 5.88005100  | -0.72787700 | C | -1.15244100 | 4.16596200  | -0.33350000 |
| C | -6.08068200 | 4.03516300  | 0.32005700  | H | -2.20048100 | 4.18954300  | 1.54491200  |
| H | -7.07137000 | 4.02315000  | 0.75778900  | H | -0.01633500 | 3.83853200  | -2.13234000 |
| C | -5.20182100 | 3.00452800  | 0.61241300  | H | -1.43527400 | 5.17816000  | -0.59903700 |
| C | -4.62744800 | -3.66871400 | 1.06978500  | C | 3.66843200  | -0.45351200 | 0.65553800  |
| C | -5.31893900 | -4.86097300 | 0.93052400  | C | 2.45668600  | -0.33646900 | -0.07556000 |
| H | -6.30769700 | -4.95068300 | 1.36353700  | C | 2.51404200  | -0.47948000 | -1.47676200 |
| C | -4.77302600 | -5.95935400 | 0.23972300  | C | 3.73349200  | -0.71907100 | -2.08489700 |
| H | -5.35405900 | -6.86961600 | 0.15645900  | C | 4.92073200  | -0.82188400 | -1.33223400 |
| C | -3.51464900 | -5.90741800 | -0.33706700 | C | 4.90356000  | -0.69212200 | 0.04401600  |
| H | -4.19120500 | 5.98238500  | -1.77988100 | C | 2.02394700  | -0.10146000 | 2.12543800  |
| H | -5.46956400 | 2.18360300  | 1.26602500  | C | 1.41213500  | -0.10613800 | 0.89837800  |
| H | -5.03991600 | -2.81854400 | 1.59895900  | H | 1.62327000  | -0.40647000 | -2.08907400 |
| H | -3.09204800 | -6.74842400 | -0.87222200 | H | 3.77822700  | -0.82900900 | -3.16227900 |
| H | -2.74090900 | -0.26958800 | -0.83937100 | H | 5.85995800  | -1.00704000 | -1.84060400 |

#### INT4

Sum of electronic and thermal Free Energies =  
-996.797456 Hartree

Sum of electronic and thermal free energies + the entropy  
correction at 298.15K = -996.78726 Hartree

|   |             |             |             |
|---|-------------|-------------|-------------|
| C | -2.67661100 | -2.12193000 | 0.02926800  |
| C | -2.21756800 | -0.85937800 | -0.33968200 |
| C | -3.14375100 | 0.11984800  | -0.67070300 |
| C | -4.49938300 | -0.20663600 | -0.60168000 |
| C | -4.92678600 | -1.47970100 | -0.21760700 |
| C | -4.00996700 | -2.47727000 | 0.10553500  |
| C | -0.43568200 | -2.28519400 | 0.09896300  |
| C | -0.71016400 | -0.87515100 | -0.29436900 |
| H | -2.82994100 | 1.10951900  | -0.98056500 |
| H | -5.23745000 | 0.54498000  | -0.85528700 |
| H | -5.98677600 | -1.69887800 | -0.17587800 |

|   |             |             |             |
|---|-------------|-------------|-------------|
| H | -4.31769600 | -3.47437800 | 0.39530900  |
| H | -1.58209400 | -3.91065600 | 0.56684500  |
| H | 0.53069500  | -2.75126400 | 0.24880000  |
| H | -0.27768700 | -0.70145400 | -1.28675700 |
| N | -1.53437300 | -2.93166200 | 0.28141900  |
| C | -0.06920200 | 0.11980000  | 0.72448200  |
| H | -0.53955500 | -0.08251400 | 1.69116900  |
| C | -0.42585200 | 1.54763200  | 0.34560800  |
| C | -1.21941300 | 2.30814800  | 1.20396300  |
| C | 0.00524700  | 2.11267400  | -0.85677400 |
| C | -1.58070500 | 3.61165200  | 0.86860500  |
| H | -1.56455800 | 1.87412800  | 2.13702600  |
| C | -0.35583800 | 3.41290500  | -1.19479900 |
| H | 0.62211300  | 1.53497200  | -1.53707500 |
| C | -1.15244100 | 4.16596200  | -0.33350000 |
| H | -2.20048100 | 4.18954300  | 1.54491200  |
| H | -0.01633500 | 3.83853200  | -2.13234000 |
| H | -1.43527400 | 5.17816000  | -0.59903700 |
| C | 3.66843200  | -0.45351200 | 0.65553800  |
| C | 2.45668600  | -0.33646900 | -0.07556000 |
| C | 2.51404200  | -0.47948000 | -1.47676200 |
| C | 3.73349200  | -0.71907100 | -2.08489700 |
| C | 4.92073200  | -0.82188400 | -1.33223400 |
| C | 4.90356000  | -0.69212200 | 0.04401600  |
| C | 2.02394700  | -0.10146000 | 2.12543800  |
| C | 1.41213500  | -0.10613800 | 0.89837800  |
| H | 1.62327000  | -0.40647000 | -2.08907400 |
| H | 3.77822700  | -0.82900900 | -3.16227900 |
| H | 5.85995800  | -1.00704000 | -1.84060400 |
| H | 5.80882700  | -0.77179600 | 0.63514000  |
| H | 4.03675000  | -0.34306000 | 2.74384200  |
| H | 1.58465800  | 0.03417300  | 3.10307800  |
| N | 3.37064400  | -0.30074400 | 1.98506900  |

#### Cat2-TS5

Sum of electronic and thermal Free Energies=  
-2460.37344 Hartree

Sum of electronic and thermal free energies + the entropy  
correction) at 298.15K= -2460.36360 Hartree

|   |            |             |             |
|---|------------|-------------|-------------|
| C | 2.71520300 | -2.39270600 | 0.80464500  |
| O | 0.52642500 | -1.71953100 | -0.97644100 |
| H | 2.28265900 | -3.37504500 | 0.62990200  |
| C | 2.07297400 | -1.61545500 | 1.83972100  |
| C | 0.72639400 | -1.89735300 | 2.12030900  |
| C | 2.73425200 | -0.61487900 | 2.56808300  |
| C | 0.02784700 | -1.13018300 | 3.03961100  |

|   |             |             |             |                                                           |             |             |             |
|---|-------------|-------------|-------------|-----------------------------------------------------------|-------------|-------------|-------------|
| H | 0.23438600  | -2.69579200 | 1.57774900  | H                                                         | -4.63371100 | 3.55476100  | -2.61973000 |
| C | 2.03876300  | 0.13362000  | 3.50636300  | N                                                         | -4.46160600 | -0.22413500 | -0.07080900 |
| H | 3.79624000  | -0.45714000 | 2.42924200  | N                                                         | -1.01476100 | 3.25026500  | 0.14170500  |
| C | 0.68090400  | -0.10524700 | 3.72346900  | H                                                         | -2.24979800 | 0.98142400  | 0.89554700  |
| H | -1.02042100 | -1.33128800 | 3.22868700  | C                                                         | 0.27069700  | 4.70749800  | 0.93926100  |
| H | 2.55300600  | 0.89945500  | 4.07503900  | H                                                         | 0.68405900  | 5.60697000  | 1.36759600  |
| H | 0.13842100  | 0.49294100  | 4.44694500  | C                                                         | -5.96116300 | -1.56067600 | 0.54101800  |
| C | 5.52957600  | -1.26088400 | -1.24516200 | H                                                         | -6.88550800 | -2.00305700 | 0.87789700  |
| C | 4.57632800  | -0.87336100 | -0.28769500 | N                                                         | -0.97562900 | 4.51970300  | 0.63101100  |
| C | 4.52420400  | 0.47535800  | 0.07247800  | N                                                         | -5.76343900 | -0.29721100 | 0.32247500  |
| C | 5.43215600  | 1.35972000  | -0.49917300 | <b>Cat3-TS1</b>                                           |             |             |             |
| C | 6.39083000  | 0.93061800  | -1.42432000 | Sum of electronic and thermal Free Energies=              |             |             |             |
| C | 6.44897600  | -0.39915900 | -1.82167500 | -2128.70354 Hartree                                       |             |             |             |
| C | 4.33218700  | -3.10147000 | -0.82923300 | Sum of electronic and thermal free energies + the entropy |             |             |             |
| C | 3.78861800  | -2.07930700 | 0.01257400  | correction at 298.15K= -2128.69371 Hartree                |             |             |             |
| H | 3.78980500  | 0.84316700  | 0.77413000  | C                                                         | 2.28380500  | -0.09757900 | -0.15901400 |
| H | 5.39396300  | 2.40622800  | -0.21961300 | C                                                         | 5.18024000  | 1.74441300  | 0.14553700  |
| H | 7.08823600  | 1.64481600  | -1.84510400 | C                                                         | 4.98484400  | 0.43795400  | -0.32461500 |
| H | 7.16534900  | -0.75135200 | -2.55380900 | C                                                         | 5.81953400  | -0.58128800 | 0.13587200  |
| H | 5.89633900  | -3.16397700 | -2.17845200 | C                                                         | 6.81651600  | -0.25555400 | 1.04675100  |
| H | 4.01380400  | -4.13221900 | -0.90784000 | C                                                         | 6.98196000  | 1.05920400  | 1.51115800  |
| H | 0.80041900  | -1.96630400 | -1.86692900 | C                                                         | 6.16141200  | 2.08772100  | 1.06834400  |
| N | 5.33820500  | -2.62629500 | -1.51967900 | H                                                         | 7.76693000  | 1.27601000  | 2.22586200  |
| C | -2.74711500 | 1.51987700  | 0.09791100  | H                                                         | 6.27866700  | 3.10668300  | 1.41697400  |
| C | -4.10601000 | 2.98608200  | -1.86476500 | H                                                         | 5.69028800  | -1.60155600 | -0.20861700 |
| C | -3.91874400 | 1.04152700  | -0.47749400 | H                                                         | 7.48027400  | -1.03108200 | 1.41087400  |
| C | -2.24852600 | 2.72786100  | -0.37582100 | C                                                         | 3.48010500  | 1.84189100  | -1.30719300 |
| C | -2.91333200 | 3.47121900  | -1.34245300 | N                                                         | 4.23210900  | 2.55848400  | -0.48903100 |
| C | -4.60766500 | 1.75978200  | -1.44677700 | H                                                         | 2.69908000  | 2.30524900  | -1.89369900 |
| H | -2.49501200 | 4.41108800  | -1.68158200 | H                                                         | 4.12216700  | 3.55515500  | -0.32695600 |
| H | -5.51954800 | 1.35484300  | -1.86865700 | C                                                         | 3.80630200  | 0.46258600  | -1.19498800 |
| C | -3.87871700 | -1.42913300 | -0.10798200 | H                                                         | 3.64944400  | -0.22164000 | -2.01816600 |
| N | -4.83106400 | -2.28649000 | 0.29106800  | O                                                         | 1.22893700  | -0.01060500 | -0.91591800 |
| C | 0.19597600  | 2.67935700  | 0.13685100  | H                                                         | 2.38337000  | 0.62498900  | 0.66401700  |
| N | 1.02135500  | 3.60264300  | 0.65303000  | C                                                         | 2.71341300  | -1.47532800 | 0.25073400  |
| I | -1.83280900 | -1.80198800 | -0.61960300 | C                                                         | 3.13791200  | -1.70490500 | 1.55784000  |
| I | 0.62068400  | 0.70098800  | -0.47485500 | C                                                         | 2.66550800  | -2.53205300 | -0.66118100 |
| C | -4.67483400 | -3.73535500 | 0.43105800  | C                                                         | 3.50446700  | -2.98837500 | 1.95766200  |
| H | -5.64268200 | -4.15041200 | 0.70260400  | H                                                         | 3.18039200  | -0.87822200 | 2.26042000  |
| H | -3.94675300 | -3.94396000 | 1.21342500  | C                                                         | 3.03893100  | -3.81039700 | -0.26422500 |
| H | -4.34587000 | -4.15296100 | -0.51885900 | H                                                         | 2.34785400  | -2.34470100 | -1.68268200 |
| C | 2.45925500  | 3.44193300  | 0.87647500  | C                                                         | 3.45716200  | -4.03999700 | 1.04730600  |
| H | 2.85829300  | 4.40625400  | 1.18237900  | H                                                         | 3.82935100  | -3.16433900 | 2.97670100  |
| H | 2.93172700  | 3.12158200  | -0.05104300 | H                                                         | 3.00760200  | -4.62862000 | -0.97464900 |
| H | 2.61816100  | 2.70415400  | 1.66299000  | H                                                         | 3.74767400  | -5.03784700 | 1.35564400  |

|                                                           |             |             |                     |   |             |             |             |
|-----------------------------------------------------------|-------------|-------------|---------------------|---|-------------|-------------|-------------|
| C                                                         | -3.48327400 | 0.40927000  | 0.32816900          | H | 7.24422400  | -1.36606300 | 1.80551900  |
| C                                                         | -4.17592500 | 0.38754900  | 3.04735600          | C | 3.57926400  | 1.63745900  | -1.27235700 |
| C                                                         | -3.48980200 | 1.57172800  | 1.08640100          | N | 4.55067400  | 2.29372800  | -0.73147900 |
| C                                                         | -3.78748200 | -0.76981100 | 0.99264900          | H | 2.84426600  | 2.12937300  | -1.89643300 |
| C                                                         | -4.13752400 | -0.80490000 | 2.33552200          | H | 4.69596300  | 3.29789500  | -0.83967400 |
| C                                                         | -3.83388700 | 1.58514100  | 2.43096700          | C | 3.63573200  | 0.20586100  | -0.89641300 |
| H                                                         | -4.36708600 | -1.75043200 | 2.81237000          | H | 3.66959600  | -0.41084500 | -1.80119500 |
| H                                                         | -3.82469600 | 2.51694300  | 2.98351700          | O | 1.21820400  | -0.00161800 | -0.95288200 |
| C                                                         | -1.98734800 | 3.13478000  | -0.17196800         | H | 2.27484500  | 0.43436000  | 0.77484900  |
| C                                                         | -2.71689100 | -2.59319600 | -0.36459900         | C | 2.42047500  | -1.64162800 | 0.31878500  |
| I                                                         | -0.37020500 | 1.84651000  | -0.55483800         | C | 2.33603600  | -1.97229500 | 1.66932900  |
| I                                                         | -0.82248300 | -1.81677900 | -0.63425200         | C | 2.54895000  | -2.65958400 | -0.62967000 |
| H                                                         | -4.44735300 | 0.38006800  | 4.09487400          | C | 2.37672000  | -3.30644000 | 2.07198000  |
| N                                                         | -3.12259200 | 2.81290100  | 0.46448700          | H | 2.23463500  | -1.18375900 | 2.40857300  |
| N                                                         | -3.74320500 | -2.01351700 | 0.27340800          | C | 2.59317400  | -3.99060000 | -0.23007800 |
| H                                                         | -3.27654600 | 0.42631000  | -0.73552300         | H | 2.60659500  | -2.41061700 | -1.68514300 |
| N                                                         | -4.81682900 | -2.82735400 | 0.23947100          | C | 2.50604400  | -4.31654400 | 1.12337500  |
| N                                                         | -3.94084000 | 3.88350600  | 0.52000500          | H | 2.30775800  | -3.55479200 | 3.12505300  |
| N                                                         | -4.49371900 | -3.87098900 | -0.39648200         | H | 2.69438800  | -4.77480500 | -0.97191000 |
| N                                                         | -3.21157100 | -3.75307300 | -0.78228300         | H | 2.54003000  | -5.35421900 | 1.43519200  |
| N                                                         | -3.35891000 | 4.84351800  | -0.06041700         | C | -3.38750900 | 0.61811600  | 0.28127200  |
| N                                                         | -2.16198700 | 4.41083300  | -0.49694200         | C | -4.18198200 | 0.61209600  | 2.97179200  |
| C                                                         | -2.54262500 | -4.81143800 | -1.54056900         | C | -3.34911200 | 1.77243800  | 1.05181800  |
| H                                                         | -2.23826600 | -4.41199300 | -2.50626000         | C | -3.79006000 | -0.54698600 | 0.91846100  |
| H                                                         | -1.68403900 | -5.16196200 | -0.97022300         | C | -4.19146100 | -0.57314700 | 2.24729500  |
| H                                                         | -3.26735700 | -5.61102400 | -1.66892500         | C | -3.74264200 | 1.79168400  | 2.38294200  |
| C                                                         | -1.25040300 | 5.29650600  | -1.22186000         | H | -4.49674000 | -1.50731100 | 2.70345200  |
| H                                                         | -0.30301900 | 5.33667100  | -0.68773700         | H | -3.69496400 | 2.71549500  | 2.94715600  |
| H                                                         | -1.11707800 | 4.91231300  | -2.23173900         | C | -1.70838400 | 3.25442300  | -0.13240900 |
| H                                                         | -1.71559800 | 6.27843500  | -1.24483900         | C | -2.79455700 | -2.41421700 | -0.43936300 |
| <b>Cat3-INT1</b>                                          |             |             |                     | I | -0.14933700 | 1.79482500  | -0.54454900 |
| Sum of electronic and thermal Free Energies=              |             |             |                     | I | -0.85732900 | -1.72071500 | -0.68553000 |
| -2128.70706 Hartree                                       |             |             |                     | H | -4.49245000 | 0.61107200  | 4.00845000  |
| Sum of electronic and thermal free energies + the entropy |             |             |                     | N | -2.88279700 | 2.99696600  | 0.46557300  |
| correction at 298.15K=                                    |             |             |                     | N | -3.79916300 | -1.78578900 | 0.18898800  |
|                                                           |             |             | -2128.69722 Hartree | H | -3.13756300 | 0.63335900  | -0.77257500 |
| C                                                         | 2.31387600  | -0.19549900 | -0.12834800         | H | -3.13756300 | 0.63335900  | -0.77257500 |
| C                                                         | 5.40141700  | 1.44587200  | 0.02748600          | N | -4.91077800 | -2.54744600 | 0.14632300  |
| C                                                         | 4.89055100  | 0.15252900  | -0.06985900         | N | -3.63140800 | 4.11882200  | 0.54152700  |
| C                                                         | 5.55608200  | -0.88111700 | 0.57549600          | N | -4.63261000 | -3.60588500 | -0.48617500 |
| C                                                         | 6.70919000  | -0.57219900 | 1.29796400          | N | -3.34243400 | -3.54913900 | -0.86005000 |
| C                                                         | 7.19146000  | 0.73675500  | 1.38117400          | N | -2.97184500 | 5.05447100  | 0.00810400  |
| C                                                         | 6.53870700  | 1.78464500  | 0.73716200          | N | -1.79518100 | 4.55130700  | -0.41320400 |
| H                                                         | 8.08930000  | 0.94118300  | 1.95177100          | C | -2.71640000 | -4.64064900 | -1.60706600 |
| H                                                         | 6.89798800  | 2.80518800  | 0.78385200          | H | -2.38367300 | -4.26103300 | -2.57141000 |
| H                                                         | 5.19716800  | -1.90193800 | 0.51747000          | H | -1.88035200 | -5.02765900 | -1.02674500 |

|                                                           |             |             |             |                                                           |             |             |             |
|-----------------------------------------------------------|-------------|-------------|-------------|-----------------------------------------------------------|-------------|-------------|-------------|
| H                                                         | -3.47578600 | -5.40680300 | -1.73935500 | C                                                         | 4.77603000  | 0.81526600  | 1.66141400  |
| C                                                         | -0.81192900 | 5.39666100  | -1.08851400 | H                                                         | 3.45215600  | 3.94595100  | 1.70491300  |
| H                                                         | 0.14128500  | 5.30590400  | -0.57160600 | H                                                         | 5.45857800  | 0.16835900  | 2.19954800  |
| H                                                         | -0.72465600 | 5.07719900  | -2.12558900 | C                                                         | 3.41049200  | -2.03498500 | 0.06492400  |
| H                                                         | -1.17726400 | 6.41887600  | -1.03326300 | C                                                         | 0.72543800  | 3.04734500  | -0.60697800 |
| <b>Cat3-TS2</b>                                           |             |             |             | I                                                         | 1.32032700  | -1.86984600 | 0.33497700  |
| Sum of electronic and thermal Free Energies=              |             |             |             | I                                                         | -0.36866300 | 1.36095800  | -0.13403300 |
| -2128.67072 Hartree                                       |             |             |             | H                                                         | 5.09764200  | 2.52502100  | 2.91501100  |
| Sum of electronic and thermal free energies + the entropy |             |             |             | N                                                         | 4.30040600  | -1.03681400 | 0.17295300  |
| correction at 298.15K=                                    |             |             |             | N                                                         | 2.03347800  | 3.24271200  | -0.39044500 |
| -2128.66089 Hartree                                       |             |             |             | H                                                         | 2.71558300  | 0.73546200  | -1.06377700 |
| C                                                         | -2.16153900 | -1.99604100 | 0.27868400  | N                                                         | 2.39141000  | 4.45949300  | -0.84677900 |
| O                                                         | -1.00733100 | -1.18998200 | 0.55984100  | N                                                         | 5.54491700  | -1.49545800 | -0.07550300 |
| H                                                         | -1.96952400 | -3.03676600 | 0.56855400  | N                                                         | 5.45489800  | -2.72775500 | -0.33938300 |
| C                                                         | -2.62280000 | -1.95447900 | -1.15969000 | N                                                         | 1.36400300  | 5.00853800  | -1.33824000 |
| C                                                         | -1.78305300 | -1.50136800 | -2.17416900 | C                                                         | 3.73355400  | -4.45836600 | -0.52262600 |
| C                                                         | -3.90908900 | -2.39433000 | -1.48260700 | H                                                         | 3.02678900  | -4.45714600 | -1.35066800 |
| C                                                         | -2.22684600 | -1.47613100 | -3.49627000 | H                                                         | 4.62638500  | -5.01993600 | -0.78504400 |
| H                                                         | -0.77895500 | -1.16877500 | -1.93804800 | H                                                         | 3.27959900  | -4.86282600 | 0.38012300  |
| C                                                         | -4.35167100 | -2.37076000 | -2.79975900 | C                                                         | -1.01130000 | 4.51399800  | -1.68331700 |
| H                                                         | -4.56927200 | -2.74498400 | -0.69456000 | H                                                         | -1.30447000 | 3.80991700  | -2.46014100 |
| C                                                         | -3.51123000 | -1.90626300 | -3.81132000 | H                                                         | -1.70001000 | 4.48188700  | -0.84056900 |
| H                                                         | -1.56589800 | -1.11825200 | -4.27763100 | H                                                         | -0.94623100 | 5.52187300  | -2.08447700 |
| H                                                         | -5.35433000 | -2.70743000 | -3.03761400 | N                                                         | 4.15855800  | -3.08244800 | -0.26504000 |
| H                                                         | -3.85799400 | -1.88139500 | -4.83795300 | N                                                         | 0.32797300  | 4.16197100  | -1.20902800 |
| C                                                         | -4.85889400 | -0.17889800 | 2.21239100  | <b>Cat3- TS2'</b>                                         |             |             |             |
| C                                                         | -4.05556000 | -0.25360100 | 1.06532800  | Sum of electronic and thermal Free Energies=              |             |             |             |
| C                                                         | -4.23086700 | 0.68780400  | 0.04804300  | -2205.10553 Hartree                                       |             |             |             |
| C                                                         | -5.19342500 | 1.67315900  | 0.22455500  | Sum of electronic and thermal free energies + the entropy |             |             |             |
| C                                                         | -5.97315800 | 1.73627800  | 1.39044300  | correction at 298.15K=                                    |             |             |             |
| C                                                         | -5.81836800 | 0.80783700  | 2.40946800  | -2205.09569 Hartree                                       |             |             |             |
| C                                                         | -3.53235900 | -1.95952600 | 2.51084400  | C                                                         | 2.19573800  | 0.11207200  | 0.26401100  |
| C                                                         | -3.12806200 | -1.37541300 | 1.27990400  | C                                                         | 5.65880700  | 1.61604000  | 0.20315500  |
| H                                                         | -3.64181600 | 0.64694400  | -0.86136400 | C                                                         | 4.89635900  | 0.43638500  | 0.25502000  |
| H                                                         | -5.34993400 | 2.40843700  | -0.55602700 | C                                                         | 5.54634600  | -0.75460900 | 0.60612200  |
| H                                                         | -6.71256700 | 2.52138900  | 1.49419200  | C                                                         | 6.90468100  | -0.71293500 | 0.88815800  |
| H                                                         | -6.41420200 | 0.84141500  | 3.31356100  | C                                                         | 7.63900000  | 0.48153000  | 0.81582900  |
| H                                                         | -4.89509100 | -1.40636600 | 3.97190200  | C                                                         | 7.02389700  | 1.67216800  | 0.46543100  |
| H                                                         | -3.12001400 | -2.82510800 | 3.01147400  | H                                                         | 8.69955200  | 0.47181500  | 1.03711700  |
| H                                                         | -1.97898600 | -0.87484300 | 1.57786500  | H                                                         | 7.56949000  | 2.60585200  | 0.40043900  |
| N                                                         | -4.49737600 | -1.23906000 | 3.05230200  | H                                                         | 5.01285700  | -1.69473900 | 0.66030900  |
| C                                                         | 3.19775300  | 1.11014800  | -0.16839300 | H                                                         | 7.41321700  | -1.62813100 | 1.16831100  |
| C                                                         | 4.56631700  | 2.13026400  | 2.05884600  | C                                                         | 3.57095600  | 2.20938800  | -0.32037000 |
| C                                                         | 4.08479800  | 0.32950900  | 0.56022800  | N                                                         | 4.80164800  | 2.65798100  | -0.15388000 |
| C                                                         | 2.98384700  | 2.40305700  | 0.28809100  | H                                                         | 2.77082400  | 2.88359300  | -0.59690100 |
| C                                                         | 3.65251700  | 2.93046800  | 1.38464800  | H                                                         | 5.09043500  | 3.62078100  | -0.30017600 |

|   |             |             |             |                                                           |             |             |             |
|---|-------------|-------------|-------------|-----------------------------------------------------------|-------------|-------------|-------------|
| C | 3.52450600  | 0.79516800  | -0.16268300 | N                                                         | -4.21484800 | 3.79792600  | 0.48848700  |
| H | 3.45277700  | 0.54843400  | -1.47203300 | N                                                         | -4.40963000 | -3.92956700 | -0.73236300 |
| O | 1.21879600  | 0.24738700  | -0.74833300 | N                                                         | -3.62362800 | 4.79624200  | -0.01208400 |
| H | 1.84914400  | 0.61653000  | 1.17500800  | <b>Cat3-INT2</b>                                          |             |             |             |
| C | 2.41730100  | -1.34752200 | 0.61081600  | Sum of electronic and thermal Free Energies=              |             |             |             |
| C | 2.41136700  | -1.75773400 | 1.94230300  | -2128.737935 Hartree                                      |             |             |             |
| C | 2.62184400  | -2.29465000 | -0.39624000 | Sum of electronic and thermal free energies + the entropy |             |             |             |
| C | 2.61500100  | -3.09684200 | 2.26949100  | correction at 298.15K= -2128.72808 Hartree                |             |             |             |
| H | 2.24770000  | -1.02488300 | 2.72627500  | C                                                         | -2.23383900 | -2.13655800 | 1.04495100  |
| C | 2.82497400  | -3.63197100 | -0.07130900 | O                                                         | -0.97502100 | -1.42203100 | 1.17672800  |
| H | 2.62874800  | -1.98954700 | -1.43782700 | H                                                         | -2.19798700 | -2.98669000 | 1.73316300  |
| C | 2.82345500  | -4.03581300 | 1.26297500  | C                                                         | -2.35353400 | -2.66376900 | -0.36834400 |
| H | 2.60686600  | -3.40598200 | 3.30852600  | C                                                         | -1.46938500 | -2.31540900 | -1.38535800 |
| H | 2.98522500  | -4.35963200 | -0.85888200 | C                                                         | -3.42755000 | -3.50877200 | -0.66086800 |
| H | 2.98134900  | -5.07811700 | 1.51558200  | C                                                         | -1.65826400 | -2.79733900 | -2.68110400 |
| O | 2.81538700  | 0.14571200  | -2.57914000 | H                                                         | -0.63661400 | -1.65251900 | -1.18869800 |
| H | 2.78168500  | 0.85239100  | -3.23850800 | C                                                         | -3.61589900 | -3.99031100 | -1.94994900 |
| H | 1.94226200  | 0.17578500  | -1.98126400 | H                                                         | -4.12125300 | -3.78217700 | 0.12834000  |
| C | -3.61288000 | 0.34490300  | 0.21730800  | C                                                         | -2.73107400 | -3.63272200 | -2.96747000 |
| C | -4.52745700 | 0.21434000  | 2.86704900  | H                                                         | -0.96450000 | -2.51272700 | -3.46399600 |
| C | -3.72963500 | 1.48277400  | 1.00296600  | H                                                         | -4.45392700 | -4.64403800 | -2.16304900 |
| C | -3.92515700 | -0.86410300 | 0.82134000  | H                                                         | -2.87895500 | -4.00570100 | -3.97432600 |
| C | -4.38346500 | -0.95377800 | 2.12861500  | C                                                         | -5.00064800 | 0.36267100  | 1.53027100  |
| C | -4.18358400 | 1.44212400  | 2.31407700  | C                                                         | -4.08689300 | -0.26927200 | 0.65058300  |
| H | -4.61364800 | -1.92179500 | 2.55764200  | C                                                         | -4.06681500 | 0.13326800  | -0.69908300 |
| H | -4.25562600 | 2.35678200  | 2.89051200  | C                                                         | -4.92027500 | 1.14139300  | -1.11112800 |
| C | -2.19355300 | 3.12983600  | -0.09311800 | C                                                         | -5.80918100 | 1.76379600  | -0.21065800 |
| N | -2.38669100 | 4.41323000  | -0.37907100 | C                                                         | -5.86516600 | 1.38145800  | 1.11727100  |
| C | -2.68587000 | -2.60138600 | -0.50368400 | C                                                         | -3.88492800 | -1.17347900 | 2.71190400  |
| N | -3.10540100 | -3.75745600 | -1.00599500 | C                                                         | -3.37382200 | -1.24845100 | 1.43967000  |
| I | -0.49193600 | 1.89924900  | -0.41603700 | H                                                         | -3.39657100 | -0.33539900 | -1.41081400 |
| I | -0.80032500 | -1.77625000 | -0.58495200 | H                                                         | -4.91089000 | 1.45749000  | -2.14803600 |
| C | -1.45299800 | 5.35448200  | -0.99697100 | H                                                         | -6.46458800 | 2.54982700  | -0.56773900 |
| H | -0.54416400 | 5.38978500  | -0.39926900 | H                                                         | -6.55124200 | 1.84651000  | 1.81588400  |
| H | -1.94117700 | 6.32538400  | -1.00503500 | H                                                         | -5.38921800 | 0.02554000  | 3.59288800  |
| H | -1.24162900 | 5.02423700  | -2.01259800 | H                                                         | -3.62208800 | -1.74852500 | 3.58820600  |
| C | -2.34709800 | -4.75788200 | -1.75873600 | H                                                         | -0.90907900 | -1.17463300 | 2.11265500  |
| H | -3.01028100 | -5.60592300 | -1.90688700 | N                                                         | -4.85215100 | -0.21178600 | 2.76990500  |
| H | -1.47738000 | -5.05039600 | -1.17295800 | C                                                         | 2.92366600  | 1.49343400  | -0.35487600 |
| H | -2.05198400 | -4.32847300 | -2.71468700 | C                                                         | 4.24552400  | 2.89524100  | 1.68838700  |
| H | -4.88343000 | 0.16474100  | 3.88776500  | C                                                         | 3.99305700  | 0.94261600  | 0.33509100  |
| N | -3.36138900 | 2.75371000  | 0.44814200  | C                                                         | 2.51748300  | 2.75872300  | 0.04285700  |
| N | -3.77856000 | -2.08011300 | 0.06998000  | C                                                         | 3.15637700  | 3.47277500  | 1.04664500  |
| H | -3.31576400 | 0.40251000  | -0.82341900 | C                                                         | 4.66500200  | 1.61552700  | 1.34584900  |
| N | -4.81805300 | -2.92432800 | -0.08381100 | H                                                         | 2.79911500  | 4.45826100  | 1.32106700  |

|                                                           |             |             |             |                                              |             |             |             |
|-----------------------------------------------------------|-------------|-------------|-------------|----------------------------------------------|-------------|-------------|-------------|
| H                                                         | 5.49579300  | 1.13972600  | 1.85311700  | C                                            | 5.33704900  | 1.26772600  | -1.41836200 |
| C                                                         | 3.77204300  | -1.53600600 | 0.01658400  | C                                            | 6.25633500  | 0.61946700  | -2.25722100 |
| N                                                         | 4.65801500  | -2.43691300 | -0.39052600 | C                                            | 6.29579800  | -0.76419700 | -2.33415400 |
| C                                                         | 0.12555700  | 2.93475900  | -0.68334100 | C                                            | 4.19273600  | -3.11671400 | -0.63948300 |
| N                                                         | -0.50366600 | 3.88241900  | -1.36715000 | C                                            | 3.71721700  | -1.92927300 | -0.04680300 |
| I                                                         | 1.82065200  | -1.83699800 | 0.57006200  | H                                            | 3.75375300  | 1.08470700  | 0.01188900  |
| I                                                         | -0.65843900 | 1.20600700  | 0.09404600  | H                                            | 5.31473900  | 2.35093300  | -1.39352500 |
| C                                                         | 4.48874000  | -3.88201000 | -0.55546000 | H                                            | 6.93553300  | 1.20801700  | -2.86228900 |
| H                                                         | 4.23676400  | -4.31751500 | 0.41000200  | H                                            | 6.98105100  | -1.28355400 | -2.99336200 |
| H                                                         | 5.43998800  | -4.26732200 | -0.91199700 | H                                            | 5.71229300  | -3.53363700 | -1.99730600 |
| H                                                         | 3.70470400  | -4.06081600 | -1.28907300 | H                                            | 3.86273200  | -4.13076700 | -0.46149900 |
| C                                                         | -1.91399700 | 3.94072800  | -1.75800900 | H                                            | 1.29781800  | -1.65964200 | -1.28677200 |
| H                                                         | -2.05434700 | 4.87974600  | -2.28686900 | N                                            | 5.18605900  | -2.84182000 | -1.47330000 |
| H                                                         | -2.52795200 | 3.91181300  | -0.85916300 | C                                            | -3.07137400 | 1.19757300  | -0.13202900 |
| H                                                         | -2.12967800 | 3.09685300  | -2.41150000 | C                                            | -4.36424300 | 2.07003000  | -2.46226300 |
| H                                                         | 4.75619700  | 3.43675500  | 2.47381600  | C                                            | -4.01967700 | 0.41193100  | -0.77255500 |
| N                                                         | 4.43851500  | -0.37668300 | -0.01857100 | C                                            | -2.75491300 | 2.41140500  | -0.72735700 |
| N                                                         | 1.39057400  | 3.36327900  | -0.61117700 | C                                            | -3.38545700 | 2.86479700  | -1.87788500 |
| H                                                         | 2.45384800  | 0.97532300  | -1.18409300 | C                                            | -4.67501400 | 0.82716200  | -1.92391100 |
| N                                                         | 1.49972300  | 4.55354800  | -1.23303700 | H                                            | -3.10414800 | 3.81734200  | -2.31088200 |
| N                                                         | 5.70304400  | -0.59615700 | -0.42770200 | H                                            | -5.40738400 | 0.18071300  | -2.39272600 |
| N                                                         | 5.83071700  | -1.83467600 | -0.64924300 | C                                            | -3.52759500 | -1.93384100 | -0.02707000 |
| N                                                         | 0.35927100  | 4.86201200  | -1.68504000 | N                                            | -4.35733800 | -2.87878900 | 0.40246100  |
| <b>Cat3-TS3</b>                                           |             |             |             | C                                            | -0.43994500 | 2.93924400  | 0.08688600  |
| Sum of electronic and thermal Free Energies=              |             |             |             | N                                            | 0.05704500  | 4.07044000  | 0.57470600  |
| -2128.70125 Hartree                                       |             |             |             | I                                            | -1.41133700 | -1.93815100 | -0.26354700 |
| Sum of electronic and thermal free energies + the entropy |             |             |             | I                                            | 0.46910600  | 1.07304800  | -0.18723000 |
| correction at 298.15K=                                    |             |             |             | C                                            | -4.03734900 | -4.24761400 | 0.80606500  |
| -2128.69138 Hartree                                       |             |             |             | H                                            | -4.97958100 | -4.74314200 | 1.02569000  |
| C                                                         | 2.66257400  | -1.99395300 | 0.86428600  | H                                            | -3.40660400 | -4.21484800 | 1.69281300  |
| O                                                         | 0.94419700  | -1.41920800 | -0.41999400 | H                                            | -3.52846500 | -4.74540900 | -0.01713100 |
| H                                                         | 2.20211200  | -2.97252800 | 0.96137300  | C                                            | 1.42235500  | 4.33930200  | 1.02574100  |
| C                                                         | 2.33384000  | -1.05378800 | 1.92809000  | H                                            | 1.47412000  | 5.39845300  | 1.26372600  |
| C                                                         | 1.10836300  | -1.20970100 | 2.59434000  | H                                            | 2.11108000  | 4.09573200  | 0.21873700  |
| C                                                         | 3.21480600  | -0.04812100 | 2.34201600  | H                                            | 1.62574700  | 3.73660300  | 1.90983500  |
| C                                                         | 0.73678000  | -0.32896800 | 3.59718600  | H                                            | -4.86658100 | 2.40823100  | -3.35924200 |
| H                                                         | 0.44837600  | -2.01912300 | 2.30209900  | N                                            | -4.33755200 | -0.88484800 | -0.24069700 |
| C                                                         | 2.84565400  | 0.82711200  | 3.35702000  | N                                            | -1.72802300 | 3.23362600  | -0.14604500 |
| H                                                         | 4.19903900  | 0.03075000  | 1.89890200  | H                                            | -2.61216700 | 0.88532600  | 0.79833500  |
| C                                                         | 1.60134200  | 0.70161200  | 3.96962600  | N                                            | -1.97456500 | 4.51700300  | 0.18784500  |
| H                                                         | -0.21906200 | -0.44481400 | 4.09447700  | N                                            | -5.61443800 | -1.21586100 | 0.04546500  |
| H                                                         | 3.53282500  | 1.60238300  | 3.67481400  | N                                            | -0.89813900 | 5.01682200  | 0.62289300  |
| H                                                         | 1.31327200  | 1.39168000  | 4.75454600  | N                                            | -5.62190100 | -2.41791200 | 0.43435000  |
| C                                                         | 5.39898600  | -1.46412800 | -1.53520500 | <b>Cat3-INT3</b>                             |             |             |             |
| C                                                         | 4.49130500  | -0.84607300 | -0.65301400 | Sum of electronic and thermal Free Energies= |             |             |             |
| C                                                         | 4.45478300  | 0.55402900  | -0.61978900 |                                              |             |             |             |



|                                                           |             |                     |             |                                                           |             |                    |             |
|-----------------------------------------------------------|-------------|---------------------|-------------|-----------------------------------------------------------|-------------|--------------------|-------------|
| -2128.70703 Hartree                                       |             |                     |             | I                                                         | -1.82782200 | -1.80691500        | -0.81498300 |
| Sum of electronic and thermal free energies + the entropy |             |                     |             | I                                                         | 0.61895200  | 0.68248700         | -0.75470300 |
| correction at 298.15K=                                    |             |                     |             | C                                                         | -4.64871800 | -3.79724900        | 0.46965200  |
|                                                           |             | -2128.69708 Hartree |             | H                                                         | -5.60423000 | -4.14809500        | 0.85053100  |
| C                                                         | 2.73903700  | -2.36263700         | 1.07488200  | H                                                         | -3.84123900 | -4.07808400        | 1.14366700  |
| O                                                         | 0.47175500  | -1.62958400         | -1.34195000 | H                                                         | -4.47249000 | -4.18450400        | -0.53194300 |
| H                                                         | 2.39004200  | -3.39070300         | 0.99878100  | C                                                         | 2.53722600  | 3.55391000         | 0.56748800  |
| C                                                         | 1.90969000  | -1.49378700         | 1.87818400  | H                                                         | 2.87861000  | 4.58296200         | 0.64921500  |
| C                                                         | 0.55156400  | -1.82890900         | 1.99547900  | H                                                         | 2.93244700  | 3.09444200         | -0.33623800 |
| C                                                         | 2.39917500  | -0.35617200         | 2.54013500  | H                                                         | 2.82022100  | 2.98413800         | 1.45232600  |
| C                                                         | -0.31930800 | -0.99261000         | 2.67875200  | H                                                         | -4.85278600 | 3.62415800         | -2.16435800 |
| H                                                         | 0.18782200  | -2.73236600         | 1.51886900  | N                                                         | -4.38150500 | -0.29139900        | 0.12992600  |
| C                                                         | 1.53031900  | 0.46209600          | 3.24525200  | N                                                         | -0.95761600 | 3.19685700         | 0.17298800  |
| H                                                         | 3.46110700  | -0.14487400         | 2.53654000  | H                                                         | -2.09762600 | 0.88591200         | 0.93833300  |
| C                                                         | 0.16770900  | 0.15882000          | 3.29419400  | N                                                         | -0.84650500 | 4.42087900         | 0.73215900  |
| H                                                         | -1.37286900 | -1.24115300         | 2.74150900  | N                                                         | -5.60320100 | -0.43722200        | 0.68703100  |
| H                                                         | 1.91105000  | 1.33259100          | 3.76659700  | N                                                         | 0.38204400  | 4.65069100         | 0.91271700  |
| H                                                         | -0.50929300 | 0.80965400          | 3.83637100  | N                                                         | -5.80445500 | -1.67332900        | 0.85252700  |
| C                                                         | 5.72139400  | -1.33189600         | -0.77654900 |                                                           |             |                    |             |
| C                                                         | 4.63889800  | -0.88337900         | -0.00153700 | <b>TS4</b>                                                |             |                    |             |
| C                                                         | 4.47818100  | 0.49318000          | 0.16192700  | Sum of electronic and thermal Free Energies=              |             |                    |             |
| C                                                         | 5.40730500  | 1.35202500          | -0.41585300 | -996.77109 Hartree                                        |             |                    |             |
| C                                                         | 6.49133800  | 0.86748700          | -1.15564400 | Sum of electronic and thermal free energies + the entropy |             |                    |             |
| C                                                         | 6.66210600  | -0.49725100         | -1.35618700 | correction at 298.15K=                                    |             |                    |             |
| C                                                         | 4.57807600  | -3.17855000         | -0.24575500 |                                                           |             | -996.76079 Hartree |             |
| C                                                         | 3.87974200  | -2.08713700         | 0.37329400  | C                                                         | 3.19392500  | 0.52153400         | -0.58954800 |
| H                                                         | 3.64847400  | 0.90090100          | 0.71994800  | C                                                         | 6.41516200  | -0.67619600        | -0.88382900 |
| H                                                         | 5.28562300  | 2.42152800          | -0.28705300 | C                                                         | 5.54929000  | -0.63785000        | 0.21616500  |
| H                                                         | 7.20081100  | 1.56330000          | -1.58683800 | C                                                         | 6.04308500  | -0.22900900        | 1.45407800  |
| H                                                         | 7.48040500  | -0.89569900         | -1.94346700 | C                                                         | 7.38347900  | 0.12920500         | 1.54301200  |
| H                                                         | 6.29870000  | -3.31712400         | -1.37692100 | C                                                         | 8.22475100  | 0.09693500         | 0.42053800  |
| H                                                         | 4.32442300  | -4.22959700         | -0.21177200 | C                                                         | 7.75266500  | -0.30787900        | -0.82176100 |
| H                                                         | 0.71492900  | -1.84703300         | -2.24936700 | H                                                         | 9.26288000  | 0.38928600         | 0.52457200  |
| N                                                         | 5.63368300  | -2.73334600         | -0.87463300 | H                                                         | 8.39084200  | -0.34035500        | -1.69654200 |
| C                                                         | -2.68127700 | 1.46369200          | 0.23075400  | H                                                         | 5.39618300  | -0.18938200        | 2.32361200  |
| C                                                         | -4.24691200 | 3.02145300          | -1.50034900 | H                                                         | 7.78876400  | 0.44442900         | 2.49744000  |
| C                                                         | -3.90440000 | 1.01120600          | -0.24822300 | C                                                         | 4.42713900  | -1.39274900        | -1.62621000 |
| C                                                         | -2.24541600 | 2.69956700          | -0.22930000 | N                                                         | 5.67092100  | -1.14481100        | -1.97955500 |
| C                                                         | -3.00688300 | 3.48776900          | -1.08215100 | H                                                         | 3.70357600  | -1.74488600        | -2.34800200 |
| C                                                         | -4.69613900 | 1.76890100          | -1.10091200 | H                                                         | 6.03279900  | -1.24346200        | -2.92384800 |
| H                                                         | -2.62634300 | 4.44473300          | -1.41839300 | C                                                         | 4.20905200  | -0.99869800        | -0.26817700 |
| H                                                         | -5.64249300 | 1.37548500          | -1.45202400 | H                                                         | 3.49527300  | -1.52778500        | 0.35208200  |
| C                                                         | -3.81257700 | -1.49228600         | -0.06700200 | O                                                         | 2.04299200  | 0.14007500         | -1.07404600 |
| N                                                         | -4.72330900 | -2.33890800         | 0.40313400  | H                                                         | 3.87231100  | 1.04862300         | -1.27849400 |
| C                                                         | 0.25901800  | 2.65453800          | -0.00839000 | C                                                         | 3.19236200  | 1.19037100         | 0.76401400  |
| N                                                         | 1.07885400  | 3.58635500          | 0.47012600  | C                                                         | 4.04037800  | 2.26861300         | 1.00944800  |
|                                                           |             |                     |             | C                                                         | 2.32669500  | 0.75383800         | 1.76888300  |

|   |             |             |             |                                                           |             |             |             |
|---|-------------|-------------|-------------|-----------------------------------------------------------|-------------|-------------|-------------|
| C | 4.02453500  | 2.90860300  | 2.24767300  | H                                                         | -6.30769700 | -4.95068300 | 1.36353700  |
| H | 4.71442100  | 2.60786500  | 0.22844300  | C                                                         | -4.77302600 | -5.95935400 | 0.23972300  |
| C | 2.31423500  | 1.38560400  | 3.00677600  | H                                                         | -5.35405900 | -6.86961600 | 0.15645900  |
| H | 1.66124200  | -0.08197800 | 1.57647100  | C                                                         | -3.51464900 | -5.90741800 | -0.33706700 |
| C | 3.16447200  | 2.46583500  | 3.24816300  | H                                                         | -4.19120500 | 5.98238500  | -1.77988100 |
| H | 4.68421400  | 3.74937300  | 2.42992500  | H                                                         | -5.46956400 | 2.18360300  | 1.26602500  |
| H | 1.64198900  | 1.03968200  | 3.78405200  | H                                                         | -5.03991600 | -2.81854400 | 1.59895900  |
| H | 3.15276700  | 2.96021800  | 4.21287200  | H                                                         | -3.09204800 | -6.74842400 | -0.87222200 |
| C | -2.68767900 | -0.18871000 | 0.24075200  | H                                                         | -2.74090900 | -0.26958800 | -0.83937100 |
| C | -2.61088500 | 0.01784200  | 3.03263000  | <b>INT4</b>                                               |             |             |             |
| C | -2.74893500 | 1.04713700  | 0.87192500  | Sum of electronic and thermal Free Energies =             |             |             |             |
| C | -2.54056900 | -1.31439000 | 1.04073100  | -996.797456 Hartree                                       |             |             |             |
| C | -2.50709200 | -1.22953100 | 2.42740300  | Sum of electronic and thermal free energies + the entropy |             |             |             |
| C | -2.71885500 | 1.16604500  | 2.25589100  | correction at 298.15K =                                   |             |             |             |
| H | -2.39167200 | -2.13118700 | 3.01779400  | C                                                         | -2.67661100 | -2.12193000 | 0.02926800  |
| H | -2.76824900 | 2.14835000  | 2.71116100  | C                                                         | -2.21756800 | -0.85937800 | -0.33968200 |
| C | -1.85250500 | 2.76042800  | -0.68670400 | C                                                         | -3.14375100 | 0.11984800  | -0.67070300 |
| N | -2.28322900 | 3.89290400  | -1.24257800 | C                                                         | -4.49938300 | -0.20663600 | -0.60168000 |
| C | -1.33856500 | -3.05996700 | -0.25634900 | C                                                         | -4.92678600 | -1.47970100 | -0.21760700 |
| N | -1.55779900 | -4.31851200 | -0.63590300 | C                                                         | -4.00996700 | -2.47727000 | 0.10553500  |
| I | -0.00172800 | 1.83114800  | -0.90404800 | C                                                         | -0.43568200 | -2.28519400 | 0.09896300  |
| I | 0.32560200  | -1.87786700 | -0.63410600 | C                                                         | -0.71016400 | -0.87515100 | -0.29436900 |
| C | -1.55574100 | 4.77824200  | -2.14810500 | H                                                         | -2.82994100 | 1.10951900  | -0.98056500 |
| H | -1.52126200 | 5.77448800  | -1.70880900 | H                                                         | -5.23745000 | 0.54498000  | -0.85528700 |
| H | -2.07575600 | 4.80644200  | -3.10509800 | H                                                         | -5.98677600 | -1.69887800 | -0.17587800 |
| H | -0.54578000 | 4.40163600  | -2.28612900 | H                                                         | -4.31769600 | -3.47437800 | 0.39530900  |
| C | -0.67291900 | -5.17475800 | -1.42288500 | H                                                         | -1.58209400 | -3.91065600 | 0.56684500  |
| H | -1.04179600 | -5.22751200 | -2.44703100 | H                                                         | 0.53069500  | -2.75126400 | 0.24880000  |
| H | -0.66823800 | -6.16594600 | -0.97255200 | H                                                         | -0.27768700 | -0.70145400 | -1.28675700 |
| H | 0.33361500  | -4.76481300 | -1.40603800 | N                                                         | -1.53437300 | -2.93166200 | 0.28141900  |
| H | -2.58408200 | 0.09755400  | 4.11188900  | C                                                         | -0.06920200 | 0.11980000  | 0.72448200  |
| C | -3.94575500 | 3.08212100  | 0.01759200  | H                                                         | -0.53955500 | -0.08251400 | 1.69116900  |
| C | -3.59009900 | 4.13229300  | -0.82654200 | C                                                         | -0.42585200 | 1.54763200  | 0.34560800  |
| C | -3.36318400 | -3.62158000 | 0.48886700  | C                                                         | -1.21941300 | 2.30814800  | 1.20396300  |
| C | -2.81910600 | -4.70888200 | -0.19287100 | C                                                         | 0.00524700  | 2.11267400  | -0.85677400 |
| N | -2.83627200 | 2.24004100  | 0.07797900  | C                                                         | -1.58070500 | 3.61165200  | 0.86860500  |
| N | -2.41115700 | -2.60548900 | 0.42483700  | H                                                         | -1.56455800 | 1.87412800  | 2.13702600  |
| C | -4.47174200 | 5.16876900  | -1.12280300 | C                                                         | -0.35583800 | 3.41290500  | -1.19479900 |
| C | -5.72250600 | 5.09748700  | -0.53087700 | H                                                         | 0.62211300  | 1.53497200  | -1.53707500 |
| H | -6.44491700 | 5.88005100  | -0.72787700 | C                                                         | -1.15244100 | 4.16596200  | -0.33350000 |
| C | -6.08068200 | 4.03516300  | 0.32005700  | H                                                         | -2.20048100 | 4.18954300  | 1.54491200  |
| H | -7.07137000 | 4.02315000  | 0.75778900  | H                                                         | -0.01633500 | 3.83853200  | -2.13234000 |
| C | -5.20182100 | 3.00452800  | 0.61241300  | H                                                         | -1.43527400 | 5.17816000  | -0.59903700 |
| C | -4.62744800 | -3.66871400 | 1.06978500  | C                                                         | 3.66843200  | -0.45351200 | 0.65553800  |
| C | -5.31893900 | -4.86097300 | 0.93052400  | C                                                         | 2.45668600  | -0.33646900 | -0.07556000 |

|                                                           |             |             |             |   |             |             |             |
|-----------------------------------------------------------|-------------|-------------|-------------|---|-------------|-------------|-------------|
| C                                                         | 2.51404200  | -0.47948000 | -1.47676200 | H | 0.82410000  | 1.14790700  | -2.46168700 |
| C                                                         | 3.73349200  | -0.71907100 | -2.08489700 | H | 1.49911200  | -0.91776000 | -3.66957000 |
| C                                                         | 4.92073200  | -0.82188400 | -1.33223400 | C | -4.77146300 | 2.73618300  | -1.37957400 |
| C                                                         | 4.90356000  | -0.69212200 | 0.04401600  | C | -3.83670400 | 1.88144600  | -0.74312500 |
| C                                                         | 2.02394700  | -0.10146000 | 2.12543800  | C | -3.00608700 | 2.42197700  | 0.25663400  |
| C                                                         | 1.41213500  | -0.10613800 | 0.89837800  | C | -3.11298700 | 3.76442300  | 0.57272500  |
| H                                                         | 1.62327000  | -0.40647000 | -2.08907400 | C | -4.04356100 | 4.59574300  | -0.08484700 |
| H                                                         | 3.77822700  | -0.82900900 | -3.16227900 | C | -4.88421800 | 4.09450100  | -1.06256000 |
| H                                                         | 5.85995800  | -1.00704000 | -1.84060400 | C | -5.01425100 | 0.68956500  | -2.24509300 |
| H                                                         | 5.80882700  | -0.77179600 | 0.63514000  | C | -4.00924200 | 0.56847600  | -1.32011200 |
| H                                                         | 4.03675000  | -0.34306000 | 2.74384200  | H | -2.29328000 | 1.79121100  | 0.77814600  |
| H                                                         | 1.58465800  | 0.03417300  | 3.10307800  | H | -2.47314600 | 4.18560700  | 1.34049300  |
| N                                                         | 3.37064400  | -0.30074400 | 1.98506900  | H | -4.10385100 | 5.64413900  | 0.18377500  |
| <b>Cat3-TS5</b>                                           |             |             |             | H | -5.60667000 | 4.72535900  | -1.56794700 |
| Sum of electronic and thermal Free Energies=              |             |             |             | H | -6.20994300 | 2.31944600  | -2.88617200 |
| -2492.38107 Hartree                                       |             |             |             | H | -5.44085900 | -0.06522700 | -2.88965200 |
| Sum of electronic and thermal free energies + the entropy |             |             |             | N | -5.46917100 | 1.98183800  | -2.28762000 |
| correction at 298.15K=                                    |             |             |             | O | -0.84295900 | -0.03083500 | 1.58376300  |
| -2492.37121 Hartree                                       |             |             |             | H | -1.00878800 | -0.13139900 | 2.53088400  |
| C                                                         | -3.56558300 | -2.56122400 | 2.15510100  | C | 3.55879200  | 0.38203900  | -0.43628700 |
| C                                                         | -2.91413400 | -2.44551300 | 0.92129600  | C | 5.97389900  | 0.15830600  | 0.97095400  |
| C                                                         | -2.20912000 | -3.54837200 | 0.44074800  | C | 4.19385900  | -0.84128000 | -0.27264900 |
| C                                                         | -2.17890500 | -4.70743700 | 1.20996800  | C | 4.14742300  | 1.48125700  | 0.17325600  |
| C                                                         | -2.82174600 | -4.78085100 | 2.45219000  | C | 5.34479600  | 1.39315900  | 0.87087700  |
| C                                                         | -3.53327800 | -3.69747000 | 2.95065400  | C | 5.39218300  | -0.97472200 | 0.41473700  |
| C                                                         | -4.06278700 | -0.51546000 | 1.39510500  | C | 5.76754400  | 2.27714200  | 1.33293800  |
| C                                                         | -3.11888200 | -1.04800400 | 0.43599700  | H | 5.85140800  | -1.95050800 | 0.51960000  |
| H                                                         | -1.69382700 | -3.51399600 | -0.50984700 | C | 2.38584400  | -2.55648800 | -0.55333000 |
| H                                                         | -1.64288200 | -5.57393800 | 0.83991400  | N | 2.36501400  | -3.66934600 | -1.27948200 |
| H                                                         | -2.77060800 | -5.69668200 | 3.02859300  | C | 2.25921600  | 3.11619300  | 0.44704300  |
| H                                                         | -4.04562500 | -3.73282600 | 3.90440000  | N | 2.23099500  | 4.42523600  | 0.22015800  |
| H                                                         | -4.78436000 | -1.14373200 | 3.22105600  | I | 0.86819300  | -1.70402900 | 0.57952500  |
| H                                                         | -4.52703500 | 0.46166600  | 1.40488500  | I | 0.72555500  | 1.83446600  | 1.11385300  |
| H                                                         | -2.11749900 | -0.49319200 | 0.91174800  | C | 1.31093300  | -4.68034300 | -1.35746600 |
| N                                                         | -4.24014500 | -1.35018300 | 2.38660600  | H | 1.55694300  | -5.33318700 | -2.19096800 |
| C                                                         | -3.25735600 | -0.71762500 | -1.06696800 | H | 0.36040300  | -4.17808600 | -1.53375700 |
| H                                                         | -3.86745900 | -1.51916200 | -1.49393700 | H | 1.29019600  | -5.23812500 | -0.42220400 |
| C                                                         | -1.91446900 | -0.76058900 | -1.79583200 | C | 1.11604400  | 5.35299600  | 0.40991700  |
| C                                                         | -1.54032000 | -1.90274500 | -2.50722400 | H | 0.31665100  | 5.08870000  | -0.28065700 |
| C                                                         | -1.04634300 | 0.33397300  | -1.79531300 | H | 1.49366500  | 6.34919200  | 0.19464100  |
| C                                                         | -0.31471300 | -1.96660900 | -3.16866500 | H | 0.77818800  | 5.28769600  | 1.44253500  |
| H                                                         | -2.21897900 | -2.74905500 | -2.55178800 | H | 6.90800900  | 0.07317300  | 1.51070300  |
| C                                                         | 0.17014400  | 0.28137400  | -2.46838300 | N | 3.58856700  | -2.02488300 | -0.81969700 |
| H                                                         | -1.32403800 | 1.24329300  | -1.27662500 | N | 3.50421500  | 2.76345100  | 0.09112600  |
| C                                                         | 0.54947400  | -0.87480700 | -3.14677700 | H | 2.65503900  | 0.47498700  | -1.02665200 |
| H                                                         | -0.04304000 | -2.86499300 | -3.71270100 |   |             |             |             |

|                                                           |             |             |             |                                                           |             |             |             |
|-----------------------------------------------------------|-------------|-------------|-------------|-----------------------------------------------------------|-------------|-------------|-------------|
| N                                                         | 3.52426200  | -3.80995700 | -1.94742000 | C                                                         | -3.26986500 | 1.26979300  | -0.60870700 |
| N                                                         | 4.26336900  | -2.82129600 | -1.67432600 | C                                                         | -2.02949200 | 1.18807900  | 0.03012600  |
| N                                                         | 4.19250000  | 3.84874200  | -0.32108700 | I                                                         | -1.68643400 | -0.72930300 | 0.81432600  |
| N                                                         | 3.42138100  | 4.84689100  | -0.24357300 | C                                                         | -3.60332300 | 2.50104600  | -1.18426900 |
| <b>Cat4-TS1</b>                                           |             |             |             | C                                                         | -2.72848700 | 3.57518900  | -1.10080700 |
| Sum of electronic and thermal Free Energies=              |             |             |             | C                                                         | -1.50949600 | 3.45217400  | -0.43537600 |
| -1468.37245 Hartree                                       |             |             |             | C                                                         | -1.14298900 | 2.24237600  | 0.14778100  |
| Sum of electronic and thermal free energies + the entropy |             |             |             | H                                                         | -6.13200500 | -3.24349600 | -0.40557300 |
| correction at 298.15K=                                    |             |             |             | H                                                         | -7.08385200 | -1.27514300 | -1.56691700 |
| -1468.36243 Hartree                                       |             |             |             | H                                                         | -4.55202700 | 2.61455500  | -1.69518200 |
| C                                                         | 1.43623200  | 0.03765600  | 0.54791300  | H                                                         | -3.00172000 | 4.52105300  | -1.55297400 |
| C                                                         | 3.60174700  | -2.42773700 | -0.60493700 | H                                                         | -0.83684500 | 4.29850600  | -0.36218400 |
| C                                                         | 3.83779300  | -1.29988300 | 0.19265400  | H                                                         | -0.20936100 | 2.13425200  | 0.68137900  |
| C                                                         | 4.94362700  | -0.49521700 | -0.08073600 | H                                                         | -5.82382400 | 0.83447100  | -1.70257000 |
| C                                                         | 5.76762200  | -0.84628600 | -1.14333000 | H                                                         | -3.88588400 | -3.11150600 | 0.63361800  |
| C                                                         | 5.49820500  | -1.97245400 | -1.93657300 | <b>Cat4-INT1</b>                                          |             |             |             |
| C                                                         | 4.40334500  | -2.78805600 | -1.68104700 | Sum of electronic and thermal Free Energies=              |             |             |             |
| H                                                         | 6.15858900  | -2.21291500 | -2.76123200 | -1468.37650 Hartree                                       |             |             |             |
| H                                                         | 4.18512900  | -3.66235200 | -2.28229000 | Sum of electronic and thermal free energies + the entropy |             |             |             |
| H                                                         | 5.15177800  | 0.38387600  | 0.51941000  | correction at 298.15K=                                    |             |             |             |
| H                                                         | 6.63550300  | -0.23760800 | -1.36904800 | -1468.36645 Hartree                                       |             |             |             |
| C                                                         | 1.98982700  | -2.40364700 | 0.94800100  | C                                                         | -1.57935900 | -0.09408600 | -0.45177400 |
| N                                                         | 2.45889100  | -3.06197400 | -0.09477800 | C                                                         | -4.64989400 | -1.71476300 | -0.05082100 |
| H                                                         | 1.10887100  | -2.74858000 | 1.47180300  | C                                                         | -4.13562000 | -0.42032100 | -0.11156900 |
| H                                                         | 2.03174600  | -3.89349000 | -0.49304900 | C                                                         | -4.70705000 | 0.56475900  | 0.68211100  |
| C                                                         | 2.73208900  | -1.20385900 | 1.15267400  | C                                                         | -5.77424700 | 0.20906000  | 1.50828600  |
| H                                                         | 2.84256100  | -0.78050600 | 2.14272400  | C                                                         | -6.26418400 | -1.09874300 | 1.54746800  |
| O                                                         | 0.48798000  | 0.07438800  | 1.43983200  | C                                                         | -5.70402400 | -2.09913300 | 0.75661300  |
| H                                                         | 1.20164800  | -0.41040300 | -0.43195800 | H                                                         | -7.09425200 | -1.34000700 | 2.20031100  |
| C                                                         | 2.27365500  | 1.27655800  | 0.38630100  | H                                                         | -6.06967400 | -3.11840600 | 0.76924700  |
| C                                                         | 2.71367300  | 1.65487000  | -0.88053700 | H                                                         | -4.34071300 | 1.58416700  | 0.66126500  |
| C                                                         | 2.58744500  | 2.06434100  | 1.49472200  | H                                                         | -6.23429100 | 0.96501500  | 2.13364200  |
| C                                                         | 3.46651500  | 2.81617000  | -1.04208100 | C                                                         | -2.97920100 | -1.82495100 | -1.54947800 |
| H                                                         | 2.46585900  | 1.03891700  | -1.74001400 | N                                                         | -3.89540800 | -2.51174600 | -0.95415400 |
| C                                                         | 3.34723100  | 3.21746500  | 1.33511300  | H                                                         | -2.30031000 | -2.27497600 | -2.26152400 |
| H                                                         | 2.23335400  | 1.76642500  | 2.47607800  | H                                                         | -4.05595300 | -3.50794600 | -1.10505800 |
| C                                                         | 3.78777400  | 3.59514900  | 0.06574700  | C                                                         | -2.98410100 | -0.42018000 | -1.07895500 |
| H                                                         | 3.80269400  | 3.10941500  | -2.03010900 | H                                                         | -3.12454800 | 0.24933800  | -1.93455700 |
| H                                                         | 3.59518800  | 3.82539600  | 2.19784800  | O                                                         | -0.60575400 | -0.30254200 | -1.40958000 |
| H                                                         | 4.37734200  | 4.49659800  | -0.05699000 | H                                                         | -1.47222000 | -0.77969000 | 0.40871800  |
| C                                                         | -5.56649500 | -2.32092900 | -0.46050600 | C                                                         | -1.55885500 | 1.32360000  | 0.09889000  |
| C                                                         | -6.10146700 | -1.20975700 | -1.11466200 | C                                                         | -1.09063200 | 1.55265400  | 1.39094500  |
| C                                                         | -5.39195600 | -0.01887700 | -1.19310100 | C                                                         | -1.90458000 | 2.41445000  | -0.70254800 |
| C                                                         | -4.12348600 | 0.07369200  | -0.61086600 | C                                                         | -0.95888500 | 2.85306700  | 1.87833800  |
| C                                                         | -3.61352400 | -1.05250100 | 0.03714500  | H                                                         | -0.81961700 | 0.70829900  | 2.01824800  |
| C                                                         | -4.30616600 | -2.25131000 | 0.12481700  | C                                                         | -1.78095600 | 3.71175200  | -0.21808800 |

|   |             |             |             |   |             |             |             |
|---|-------------|-------------|-------------|---|-------------|-------------|-------------|
| H | -2.25864400 | 2.25519800  | -1.71676000 | C | -4.24513300 | 1.30191600  | 1.11129800  |
| C | -1.30397200 | 3.93437000  | 1.07434100  | C | -3.20020200 | 0.67622900  | 0.41580700  |
| H | -0.58803500 | 3.01800900  | 2.88371100  | C | -2.67921200 | 1.29076700  | -0.72547600 |
| H | -2.05156500 | 4.55168700  | -0.84821900 | C | -3.20679700 | 2.51677800  | -1.11131900 |
| H | -1.20399800 | 4.94646200  | 1.44976500  | C | -4.23644900 | 3.13261500  | -0.38371200 |
| C | 4.91765500  | -2.79960600 | 1.37966700  | C | -4.77783200 | 2.53185800  | 0.74389800  |
| C | 5.69163700  | -1.64738000 | 1.53100300  | C | -3.85492400 | -0.61953400 | 2.19545100  |
| C | 5.22735300  | -0.41607200 | 1.08693700  | C | -2.87737700 | -0.55093900 | 1.16290000  |
| C | 3.96939200  | -0.32730300 | 0.48000000  | H | -1.90701200 | 0.81492200  | -1.31947200 |
| C | 3.21207500  | -1.49091600 | 0.33455800  | H | -2.82158000 | 3.00472100  | -1.99889400 |
| C | 3.66445900  | -2.72671300 | 0.77858800  | H | -4.62226700 | 4.08971900  | -0.71356100 |
| C | 3.35800100  | 0.90500300  | -0.04379400 | H | -5.57863600 | 2.99111600  | 1.31070800  |
| C | 2.09344400  | 0.80396000  | -0.62833500 | H | -5.30684900 | 0.69332400  | 2.87521200  |
| I | 1.31026400  | -1.14186300 | -0.54955100 | H | -3.97877200 | -1.38277800 | 2.95194100  |
| C | 3.94630100  | 2.17577000  | -0.02076800 | H | -1.82713500 | -0.30284100 | 1.82459200  |
| C | 3.28805700  | 3.26506800  | -0.57470800 | N | -4.60143300 | 0.46854800  | 2.17907300  |
| C | 2.03894500  | 3.11259100  | -1.17691400 | C | 3.57459500  | 3.46619300  | -1.27384900 |
| C | 1.42534700  | 1.86385800  | -1.21397900 | C | 4.79464600  | 2.80697900  | -1.11319400 |
| H | 5.29149500  | -3.75440600 | 1.73068500  | C | 4.84989400  | 1.53454100  | -0.56046500 |
| H | 6.66619200  | -1.71255400 | 2.00034000  | C | 3.67023200  | 0.90009500  | -0.15641800 |
| H | 4.92252600  | 2.30959400  | 0.42999100  | C | 2.46484100  | 1.58344500  | -0.32805800 |
| H | 3.75676100  | 4.24159100  | -0.54642400 | C | 2.38890400  | 2.85398500  | -0.88001800 |
| H | 1.53904900  | 3.96384000  | -1.62432500 | C | 3.58057900  | -0.43815500 | 0.44458300  |
| H | 0.46171200  | 1.71063600  | -1.67811000 | C | 2.31395200  | -0.91517900 | 0.79375100  |
| H | 5.84266400  | 0.46736300  | 1.21222500  | I | 0.80916900  | 0.46741200  | 0.33124400  |
| H | 3.06067200  | -3.62069000 | 0.66265700  | C | 4.66478700  | -1.28473600 | 0.70299200  |

#### Cat4-TS2

Sum of electronic and thermal Free Energies=  
-1468.33772 Hartree

Sum of electronic and thermal free energies + the entropy  
correction at 298.15K= -1468.32769 Hartree

|   |             |             |             |
|---|-------------|-------------|-------------|
| C | -1.91232600 | -1.66504000 | 0.76617200  |
| O | -0.70292600 | -1.15427200 | 1.33100200  |
| H | -2.20361200 | -2.57475600 | 1.30841400  |
| C | -1.86151500 | -1.99286900 | -0.71099600 |
| C | -0.65742300 | -2.36559100 | -1.30790700 |
| C | -3.02665200 | -1.98568900 | -1.48126400 |
| C | -0.61294000 | -2.70453700 | -2.65863300 |
| H | 0.24824400  | -2.40428000 | -0.71295900 |
| C | -2.98481700 | -2.32756600 | -2.82926400 |
| H | -3.97149800 | -1.70445800 | -1.02626200 |
| C | -1.77526500 | -2.68147100 | -3.42385900 |
| H | 0.33092800  | -2.98796300 | -3.11059900 |
| H | -3.89558200 | -2.31130100 | -3.41714000 |
| H | -1.74056100 | -2.94016600 | -4.47594000 |

|   |            |             |             |
|---|------------|-------------|-------------|
| C | 4.46097100 | -2.53019900 | 1.28068200  |
| C | 3.17800700 | -2.96084200 | 1.61688900  |
| C | 2.07466600 | -2.14678300 | 1.37586900  |
| H | 3.54637300 | 4.45926700  | -1.70624400 |
| H | 5.71183700 | 3.29353500  | -1.42302000 |
| H | 5.66871700 | -0.96461500 | 0.45059600  |
| H | 5.31177400 | -3.17261900 | 1.47376600  |
| H | 3.02934400 | -3.93287000 | 2.07165300  |
| H | 1.06578300 | -2.44409300 | 1.63090800  |
| H | 5.80571000 | 1.03786600  | -0.44297800 |
| H | 1.43899900 | 3.36214400  | -1.00333000 |

#### Cat4-TS2'

Sum of electronic and thermal Free Energies=  
-1544.78153 Hartree

Sum of electronic and thermal free energies + the entropy  
correction at 298.15K= -1544.77152 Hartree

|   |            |             |            |
|---|------------|-------------|------------|
| C | 1.53694100 | -0.94216000 | 0.64631400 |
| C | 5.11910000 | 0.12218700  | 0.64728400 |
| C | 3.77900200 | 0.45313600  | 0.40670300 |

|   |             |             |             |                                                           |             |             |             |
|---|-------------|-------------|-------------|-----------------------------------------------------------|-------------|-------------|-------------|
| C | 3.47857400  | 1.59686000  | -0.33514200 | H                                                         | -4.70020000 | 2.94245400  | -1.14287800 |
| C | 4.53349500  | 2.36296700  | -0.81363200 | H                                                         | -3.00194600 | 4.69530900  | -1.45226100 |
| C | 5.86881400  | 2.01582200  | -0.55036400 | H                                                         | -0.63574200 | 4.27997800  | -0.83788700 |
| C | 6.18733000  | 0.88739900  | 0.19171500  | H                                                         | 0.03935800  | 2.06998500  | 0.09106800  |
| H | 6.66603100  | 2.64156400  | -0.93369600 | H                                                         | -6.08236400 | 1.28328700  | -0.80365100 |
| H | 7.21294700  | 0.61119800  | 0.40463500  | H                                                         | -3.99072700 | -2.80820300 | 1.10975300  |
| H | 2.44882800  | 1.87431600  | -0.53003300 | <b>Cat4-INT2</b>                                          |             |             |             |
| H | 4.32507700  | 3.25013500  | -1.40021200 | Sum of electronic and thermal Free Energies=              |             |             |             |
| C | 3.89350700  | -1.47562800 | 1.62750900  | -1468.41947 Hartree                                       |             |             |             |
| N | 5.12718400  | -1.06123400 | 1.39598200  | Sum of electronic and thermal free energies + the entropy |             |             |             |
| H | 3.70088500  | -2.38166000 | 2.18683300  | correction at 298.15K= -1468.40942 Hartree                |             |             |             |
| H | 5.96305000  | -1.51401500 | 1.75393000  | C                                                         | 2.38481400  | -1.57052100 | -1.06018900 |
| C | 2.95263300  | -0.54694800 | 1.10432200  | O                                                         | 1.02151000  | -1.80750300 | -1.47751600 |
| H | 2.63648200  | 0.09432200  | 2.19869000  | H                                                         | 3.03159700  | -2.20501600 | -1.67538700 |
| O | 0.64886000  | 0.11482300  | 0.89266600  | C                                                         | 2.51648700  | -2.00009800 | 0.38674200  |
| H | 1.26572800  | -1.83753800 | 1.23195400  | C                                                         | 1.45920400  | -2.57477100 | 1.08886800  |
| C | 1.56598400  | -1.34710100 | -0.82232900 | C                                                         | 3.73695500  | -1.79708400 | 1.03697200  |
| C | 2.14032800  | -2.56729600 | -1.18498600 | C                                                         | 1.61223500  | -2.91686200 | 2.43333800  |
| C | 1.05379700  | -0.51463000 | -1.81490200 | H                                                         | 0.51433900  | -2.76466300 | 0.59299600  |
| C | 2.20499900  | -2.94887600 | -2.52057900 | C                                                         | 3.89165800  | -2.14661600 | 2.37219800  |
| H | 2.53629500  | -3.22234600 | -0.41334300 | H                                                         | 4.56430700  | -1.35032800 | 0.49429700  |
| C | 1.11759800  | -0.89585600 | -3.15498100 | C                                                         | 2.82385800  | -2.70066300 | 3.07884200  |
| H | 0.60606300  | 0.43322400  | -1.53839700 | H                                                         | 0.77943700  | -3.35572400 | 2.97117100  |
| C | 1.69354600  | -2.11102600 | -3.51132600 | H                                                         | 4.84275100  | -1.98097000 | 2.86541500  |
| H | 2.65032100  | -3.90015200 | -2.78947900 | H                                                         | 2.94054100  | -2.96501900 | 4.12358600  |
| H | 0.71569300  | -0.24020700 | -3.91945400 | C                                                         | 2.99815900  | 2.14470000  | -1.19111600 |
| H | 1.74178200  | -2.40731200 | -4.55294700 | C                                                         | 2.60855200  | 1.01426400  | -0.42871800 |
| O | 1.78934000  | 0.91424700  | 2.88702700  | C                                                         | 2.16957400  | 1.22181800  | 0.89638200  |
| H | 1.48785400  | 0.51100200  | 3.71175300  | C                                                         | 2.10371800  | 2.51456000  | 1.38925300  |
| H | 1.09863400  | 0.68329100  | 2.11538400  | C                                                         | 2.48358300  | 3.61981200  | 0.60130400  |
| C | -5.80587200 | -1.87832600 | 0.41656400  | C                                                         | 2.94227200  | 3.44964100  | -0.69231800 |
| C | -6.38458100 | -0.72681900 | -0.12024200 | C                                                         | 3.26343100  | 0.33919500  | -2.48058500 |
| C | -5.61614100 | 0.39819200  | -0.38727300 | C                                                         | 2.77325200  | -0.13594600 | -1.28869700 |
| C | -4.24339700 | 0.38241300  | -0.11700900 | H                                                         | 1.89652100  | 0.38657400  | 1.53267500  |
| C | -3.69037400 | -0.78150200 | 0.41955800  | H                                                         | 1.76428600  | 2.67919400  | 2.40549900  |
| C | -4.44275300 | -1.91523300 | 0.69267100  | H                                                         | 2.42227400  | 4.61784700  | 1.01938100  |
| C | -3.31435300 | 1.49843500  | -0.34899300 | H                                                         | 3.24435400  | 4.29187900  | -1.30425300 |
| C | -1.96839100 | 1.30918800  | -0.02292900 | H                                                         | 3.74608900  | 2.27854900  | -3.17553200 |
| I | -1.61701100 | -0.60765500 | 0.74191100  | H                                                         | 3.52571900  | -0.20655900 | -3.37571000 |
| C | -3.66938800 | 2.74706900  | -0.87252600 | H                                                         | 0.99699500  | -1.70884300 | -2.43886000 |
| C | -2.70992900 | 3.73434400  | -1.04595400 | N                                                         | 3.39661400  | 1.69653900  | -2.42634900 |
| C | -1.37857900 | 3.50311800  | -0.70189500 | C                                                         | -3.09161700 | 3.33004500  | 1.41334900  |
| C | -0.98756600 | 2.27383200  | -0.17916700 | C                                                         | -4.35474700 | 2.73893000  | 1.36698000  |
| H | -6.41723700 | -2.74932500 | 0.62086100  | C                                                         | -4.53080500 | 1.46286800  | 0.84896800  |
| H | -7.44709300 | -0.70884100 | -0.33176100 | C                                                         | -3.43247800 | 0.74642500  | 0.36259200  |

|                                                           |             |             |             |                                                           |             |             |             |
|-----------------------------------------------------------|-------------|-------------|-------------|-----------------------------------------------------------|-------------|-------------|-------------|
| C                                                         | -2.18743100 | 1.37682500  | 0.42936000  | H                                                         | 4.27276000  | 2.31875200  | -2.52477700 |
| C                                                         | -1.97689600 | 2.64680000  | 0.93746500  | H                                                         | 6.24010200  | 0.99508500  | -3.20988600 |
| C                                                         | -3.47023000 | -0.60672200 | -0.20460100 | H                                                         | 6.76892400  | -1.16093600 | -2.06731200 |
| C                                                         | -2.26389400 | -1.16060300 | -0.64203400 | H                                                         | 5.84369300  | -2.84943700 | -0.08498300 |
| I                                                         | -0.67519600 | 0.16411500  | -0.34181500 | H                                                         | 3.97638600  | -3.01537200 | 1.53412600  |
| C                                                         | -4.61053700 | -1.40554000 | -0.34072800 | H                                                         | 1.03026900  | -1.99109200 | -0.50866300 |
| C                                                         | -4.51022500 | -2.67985700 | -0.88209800 | N                                                         | 5.13559200  | -2.12942700 | 0.01636100  |
| C                                                         | -3.28047500 | -3.19085300 | -1.29685300 | C                                                         | -0.04679200 | 2.43444100  | -1.16612500 |
| C                                                         | -2.12296800 | -2.42674700 | -1.17881300 | C                                                         | -1.21871000 | 3.16335800  | -1.37011900 |
| H                                                         | -2.97008600 | 4.32675400  | 1.81968100  | C                                                         | -2.46109900 | 2.56214700  | -1.22312500 |
| H                                                         | -5.21393700 | 3.28289700  | 1.74034400  | C                                                         | -2.55761800 | 1.21384900  | -0.85746200 |
| H                                                         | -5.57353200 | -1.02768600 | -0.01846400 | C                                                         | -1.36035700 | 0.52742000  | -0.64227100 |
| H                                                         | -5.40239400 | -3.28643500 | -0.97955100 | C                                                         | -0.10876600 | 1.09417700  | -0.79670400 |
| H                                                         | -3.21537700 | -4.18903400 | -1.71230900 | C                                                         | -3.81405000 | 0.46526400  | -0.69439000 |
| H                                                         | -1.15931500 | -2.81123700 | -1.48758300 | C                                                         | -3.67975700 | -0.87516300 | -0.32918800 |
| H                                                         | -5.51983900 | 1.02123300  | 0.82233400  | I                                                         | -1.65316400 | -1.46129900 | -0.04319100 |
| H                                                         | -0.99039100 | 3.09475600  | 0.96588000  | C                                                         | -5.09901000 | 0.98599200  | -0.88429200 |
| <b>Cat4-TS3</b>                                           |             |             |             | C                                                         | -6.20594500 | 0.16655300  | -0.70549300 |
| Sum of electronic and thermal Free Energies=              |             |             |             | C                                                         | -6.05175300 | -1.17166800 | -0.33799400 |
| -1468.37025 Hartree                                       |             |             |             | C                                                         | -4.77966100 | -1.70290700 | -0.14492300 |
| Sum of electronic and thermal free energies + the entropy |             |             |             | H                                                         | 0.92070000  | 2.90773700  | -1.29134300 |
| correction at 298.15K=                                    |             |             |             | H                                                         | -1.16139500 | 4.20807400  | -1.65183900 |
| -1468.36016 Hartree                                       |             |             |             | H                                                         | -5.23658100 | 2.02237800  | -1.17029900 |
| C                                                         | 2.22863100  | -0.85042400 | 1.57862000  | H                                                         | -7.19998700 | 0.57191400  | -0.85354800 |
| O                                                         | 0.58526500  | -1.58145300 | 0.24464100  | H                                                         | -6.92378700 | -1.80068100 | -0.20177300 |
| H                                                         | 1.97566300  | -1.71992300 | 2.17528500  | H                                                         | -4.65921900 | -2.74216300 | 0.14255300  |
| C                                                         | 1.55260800  | 0.38266000  | 1.96231500  | H                                                         | -3.36271600 | 3.13832000  | -1.39411100 |
| C                                                         | 0.26875800  | 0.29170700  | 2.52033700  | H                                                         | 0.77989900  | 0.50325300  | -0.62448800 |
| C                                                         | 2.16132900  | 1.63733100  | 1.84504400  | <b>Cat4-INT3</b>                                          |             |             |             |
| C                                                         | -0.42903900 | 1.43801100  | 2.86611700  | Sum of electronic and thermal Free Energies=              |             |             |             |
| H                                                         | -0.17812200 | -0.68737600 | 2.65411900  | -1468.37550 Hartree                                       |             |             |             |
| C                                                         | 1.46884400  | 2.78496600  | 2.21406000  | Sum of electronic and thermal free energies + the entropy |             |             |             |
| H                                                         | 3.18314300  | 1.71520300  | 1.49569800  | correction at 298.15K=                                    |             |             |             |
| C                                                         | 0.16678000  | 2.68942000  | 2.69854200  | -1468.36540 Hartree                                       |             |             |             |
| H                                                         | -1.43203800 | 1.36158800  | 3.26980300  | C                                                         | 2.37653900  | -1.02067700 | 1.64320800  |
| H                                                         | 1.94564900  | 3.75368000  | 2.12145600  | O                                                         | 0.45205900  | -1.84494100 | -0.26265300 |
| H                                                         | -0.37753000 | 3.58764100  | 2.96743100  | H                                                         | 2.12096300  | -1.99325000 | 2.05640100  |
| C                                                         | 5.08509900  | -0.95223100 | -0.73309100 | C                                                         | 1.51551000  | 0.06671300  | 2.05056800  |
| C                                                         | 3.97622700  | -0.20468400 | -0.29108800 | C                                                         | 0.20056400  | -0.25135100 | 2.42534600  |
| C                                                         | 3.67783000  | 0.98769100  | -0.96278400 | C                                                         | 1.94836500  | 1.39984100  | 2.11826600  |
| C                                                         | 4.49992700  | 1.39611500  | -2.00361300 | C                                                         | -0.69431800 | 0.75384600  | 2.75977300  |
| C                                                         | 5.61631200  | 0.64309200  | -2.39695700 | H                                                         | -0.10944600 | -1.29039200 | 2.41810400  |
| C                                                         | 5.92369600  | -0.55322400 | -1.76713400 | C                                                         | 1.05974100  | 2.39916900  | 2.48715800  |
| C                                                         | 4.12374200  | -2.17576400 | 0.86913400  | H                                                         | 2.98543800  | 1.64249900  | 1.92193900  |
| C                                                         | 3.35582900  | -0.99498900 | 0.77404800  | C                                                         | -0.26731000 | 2.08153600  | 2.77888600  |
| H                                                         | 2.82229600  | 1.59098100  | -0.68875600 | H                                                         | -1.71984500 | 0.50687200  | 3.01064100  |

|                                                           |             |             |             |   |             |             |             |
|-----------------------------------------------------------|-------------|-------------|-------------|---|-------------|-------------|-------------|
| H                                                         | 1.39765600  | 3.42702300  | 2.54617900  | C | 6.41516200  | -0.67619600 | -0.88382900 |
| H                                                         | -0.96361500 | 2.86872400  | 3.04532300  | C | 5.54929000  | -0.63785000 | 0.21616500  |
| C                                                         | 5.17881600  | -0.70905500 | -0.68715500 | C | 6.04308500  | -0.22900900 | 1.45407800  |
| C                                                         | 4.07602900  | -0.05003800 | -0.11721400 | C | 7.38347900  | 0.12920500  | 1.54301200  |
| C                                                         | 3.75211300  | 1.22077900  | -0.59695100 | C | 8.22475100  | 0.09693500  | 0.42053800  |
| C                                                         | 4.55019700  | 1.78877800  | -1.58386900 | C | 7.75266500  | -0.30787900 | -0.82176100 |
| C                                                         | 5.66311400  | 1.11730000  | -2.10324300 | H | 9.26288000  | 0.38928600  | 0.52457200  |
| C                                                         | 5.99317800  | -0.15851100 | -1.66367800 | H | 8.39084200  | -0.34035500 | -1.69654200 |
| C                                                         | 4.26785700  | -2.19018800 | 0.71745100  | H | 5.39618300  | -0.18938200 | 2.32361200  |
| C                                                         | 3.47449900  | -1.00490300 | 0.82450200  | H | 7.78876400  | 0.44442900  | 2.49744000  |
| H                                                         | 2.89559100  | 1.76289300  | -0.22226500 | C | 4.42713900  | -1.39274900 | -1.62621000 |
| H                                                         | 4.30268100  | 2.77512600  | -1.95829500 | N | 5.67092100  | -1.14481100 | -1.97955500 |
| H                                                         | 6.26798800  | 1.59216900  | -2.86624500 | H | 3.70357600  | -1.74488600 | -2.34800200 |
| H                                                         | 6.83443400  | -0.70770200 | -2.06859900 | H | 6.03279900  | -1.24346200 | -2.92384800 |
| H                                                         | 5.96010300  | -2.68659200 | -0.36098600 | C | 4.20905200  | -0.99869800 | -0.26817700 |
| H                                                         | 4.13558200  | -3.12517000 | 1.24491400  | H | 3.49527300  | -1.52778500 | 0.35208200  |
| H                                                         | 0.80353800  | -2.07767800 | -1.13027800 | O | 2.04299200  | 0.14007500  | -1.07404600 |
| N                                                         | 5.25040400  | -1.99639100 | -0.12768800 | H | 3.87231100  | 1.04862300  | -1.27849400 |
| C                                                         | 0.14598500  | 2.37423200  | -1.05516700 | C | 3.19236200  | 1.19037100  | 0.76401400  |
| C                                                         | -0.97081800 | 3.20838800  | -1.09875000 | C | 4.04037800  | 2.26861300  | 1.00944800  |
| C                                                         | -2.24691600 | 2.68748600  | -0.93821700 | C | 2.32669500  | 0.75383800  | 1.76888300  |
| C                                                         | -2.43078800 | 1.31462100  | -0.73422800 | C | 4.02453500  | 2.90860300  | 2.24767300  |
| C                                                         | -1.28698400 | 0.51298300  | -0.68603700 | H | 4.71442100  | 2.60786500  | 0.22844300  |
| C                                                         | -0.00201200 | 1.00639400  | -0.83933500 | C | 2.31423500  | 1.38560400  | 3.00677600  |
| C                                                         | -3.73778100 | 0.65613200  | -0.57053800 | H | 1.66124200  | -0.08197800 | 1.57647100  |
| C                                                         | -3.69629600 | -0.72604000 | -0.38733600 | C | 3.16447200  | 2.46583500  | 3.24816300  |
| I                                                         | -1.70167200 | -1.52034900 | -0.34989400 | H | 4.68421400  | 3.74937300  | 2.42992500  |
| C                                                         | -4.97744100 | 1.30548000  | -0.59271500 | H | 1.64198900  | 1.03968200  | 3.78405200  |
| C                                                         | -6.14185400 | 0.56571800  | -0.43103500 | H | 3.15276700  | 2.96021800  | 4.21287200  |
| C                                                         | -6.08689300 | -0.81768900 | -0.24760700 | C | -2.68767900 | -0.18871000 | 0.24075200  |
| C                                                         | -4.85797800 | -1.47182600 | -0.22389000 | C | -2.61088500 | 0.01784200  | 3.03263000  |
| H                                                         | 1.13807800  | 2.79071300  | -1.18665800 | C | -2.74893500 | 1.04713700  | 0.87192500  |
| H                                                         | -0.84326400 | 4.27223900  | -1.26093100 | C | -2.54056900 | -1.31439000 | 1.04073100  |
| H                                                         | -5.03681900 | 2.37836400  | -0.73565800 | C | -2.50709200 | -1.22953100 | 2.42740300  |
| H                                                         | -7.10177500 | 1.06850400  | -0.44855700 | C | -2.71885500 | 1.16604500  | 2.25589100  |
| H                                                         | -7.00269700 | -1.38422100 | -0.12312700 | H | -2.39167200 | -2.13118700 | 3.01779400  |
| H                                                         | -4.81742400 | -2.54695000 | -0.07944300 | H | -2.76824900 | 2.14835000  | 2.71116100  |
| H                                                         | -3.10729100 | 3.34544700  | -0.97497300 | C | -1.85250500 | 2.76042800  | -0.68670400 |
| H                                                         | 0.84877100  | 0.33941800  | -0.77720600 | N | -2.28322900 | 3.89290400  | -1.24257800 |
| <b>TS4</b>                                                |             |             |             | C | -1.33856500 | -3.05996700 | -0.25634900 |
| Sum of electronic and thermal Free Energies=              |             |             |             | N | -1.55779900 | -4.31851200 | -0.63590300 |
| -996.77109 Hartree                                        |             |             |             | I | -0.00172800 | 1.83114800  | -0.90404800 |
| Sum of electronic and thermal free energies + the entropy |             |             |             | I | 0.32560200  | -1.87786700 | -0.63410600 |
| correction at 298.15K=                                    |             |             |             | C | -1.55574100 | 4.77824200  | -2.14810500 |
| -996.76079 Hartree                                        |             |             |             | C | -1.55574100 | 4.77824200  | -2.14810500 |
| C                                                         | 3.19392500  | 0.52153400  | -0.58954800 | H | -1.52126200 | 5.77448800  | -1.70880900 |



|   |             |             |             |   |             |             |             |
|---|-------------|-------------|-------------|---|-------------|-------------|-------------|
| H | -2.07575600 | 4.80644200  | -3.10509800 | H | -5.98677600 | -1.69887800 | -0.17587800 |
| H | -0.54578000 | 4.40163600  | -2.28612900 | H | -4.31769600 | -3.47437800 | 0.39530900  |
| C | -0.67291900 | -5.17475800 | -1.42288500 | H | -1.58209400 | -3.91065600 | 0.56684500  |
| H | -1.04179600 | -5.22751200 | -2.44703100 | H | 0.53069500  | -2.75126400 | 0.24880000  |
| H | -0.66823800 | -6.16594600 | -0.97255200 | H | -0.27768700 | -0.70145400 | -1.28675700 |
| H | 0.33361500  | -4.76481300 | -1.40603800 | N | -1.53437300 | -2.93166200 | 0.28141900  |
| H | -2.58408200 | 0.09755400  | 4.11188900  | C | -0.06920200 | 0.11980000  | 0.72448200  |
| C | -3.94575500 | 3.08212100  | 0.01759200  | H | -0.53955500 | -0.08251400 | 1.69116900  |
| C | -3.59009900 | 4.13229300  | -0.82654200 | C | -0.42585200 | 1.54763200  | 0.34560800  |
| C | -3.36318400 | -3.62158000 | 0.48886700  | C | -1.21941300 | 2.30814800  | 1.20396300  |
| C | -2.81910600 | -4.70888200 | -0.19287100 | C | 0.00524700  | 2.11267400  | -0.85677400 |
| N | -2.83627200 | 2.24004100  | 0.07797900  | C | -1.58070500 | 3.61165200  | 0.86860500  |
| N | -2.41115700 | -2.60548900 | 0.42483700  | H | -1.56455800 | 1.87412800  | 2.13702600  |
| C | -4.47174200 | 5.16876900  | -1.12280300 | C | -0.35583800 | 3.41290500  | -1.19479900 |
| C | -5.72250600 | 5.09748700  | -0.53087700 | H | 0.62211300  | 1.53497200  | -1.53707500 |
| H | -6.44491700 | 5.88005100  | -0.72787700 | C | -1.15244100 | 4.16596200  | -0.33350000 |
| C | -6.08068200 | 4.03516300  | 0.32005700  | H | -2.20048100 | 4.18954300  | 1.54491200  |
| H | -7.07137000 | 4.02315000  | 0.75778900  | H | -0.01633500 | 3.83853200  | -2.13234000 |
| C | -5.20182100 | 3.00452800  | 0.61241300  | H | -1.43527400 | 5.17816000  | -0.59903700 |
| C | -4.62744800 | -3.66871400 | 1.06978500  | C | 3.66843200  | -0.45351200 | 0.65553800  |
| C | -5.31893900 | -4.86097300 | 0.93052400  | C | 2.45668600  | -0.33646900 | -0.07556000 |
| H | -6.30769700 | -4.95068300 | 1.36353700  | C | 2.51404200  | -0.47948000 | -1.47676200 |
| C | -4.77302600 | -5.95935400 | 0.23972300  | C | 3.73349200  | -0.71907100 | -2.08489700 |
| H | -5.35405900 | -6.86961600 | 0.15645900  | C | 4.92073200  | -0.82188400 | -1.33223400 |
| C | -3.51464900 | -5.90741800 | -0.33706700 | C | 4.90356000  | -0.69212200 | 0.04401600  |
| H | -4.19120500 | 5.98238500  | -1.77988100 | C | 2.02394700  | -0.10146000 | 2.12543800  |
| H | -5.46956400 | 2.18360300  | 1.26602500  | C | 1.41213500  | -0.10613800 | 0.89837800  |
| H | -5.03991600 | -2.81854400 | 1.59895900  | H | 1.62327000  | -0.40647000 | -2.08907400 |
| H | -3.09204800 | -6.74842400 | -0.87222200 | H | 3.77822700  | -0.82900900 | -3.16227900 |
| H | -2.74090900 | -0.26958800 | -0.83937100 | H | 5.85995800  | -1.00704000 | -1.84060400 |

#### INT4

Sum of electronic and thermal Free Energies =  
-996.797456 Hartree

Sum of electronic and thermal free energies + the entropy  
correction at 298.15K = -996.78726 Hartree

|   |             |             |             |
|---|-------------|-------------|-------------|
| C | -2.67661100 | -2.12193000 | 0.02926800  |
| C | -2.21756800 | -0.85937800 | -0.33968200 |
| C | -3.14375100 | 0.11984800  | -0.67070300 |
| C | -4.49938300 | -0.20663600 | -0.60168000 |
| C | -4.92678600 | -1.47970100 | -0.21760700 |
| C | -4.00996700 | -2.47727000 | 0.10553500  |
| C | -0.43568200 | -2.28519400 | 0.09896300  |
| C | -0.71016400 | -0.87515100 | -0.29436900 |
| H | -2.82994100 | 1.10951900  | -0.98056500 |
| H | -5.23745000 | 0.54498000  | -0.85528700 |

|   |             |             |             |
|---|-------------|-------------|-------------|
| H | -5.98677600 | -1.69887800 | -0.17587800 |
| H | -4.31769600 | -3.47437800 | 0.39530900  |
| H | -1.58209400 | -3.91065600 | 0.56684500  |
| H | 0.53069500  | -2.75126400 | 0.24880000  |
| H | -0.27768700 | -0.70145400 | -1.28675700 |
| N | -1.53437300 | -2.93166200 | 0.28141900  |
| C | -0.06920200 | 0.11980000  | 0.72448200  |
| H | -0.53955500 | -0.08251400 | 1.69116900  |
| C | -0.42585200 | 1.54763200  | 0.34560800  |
| C | -1.21941300 | 2.30814800  | 1.20396300  |
| C | 0.00524700  | 2.11267400  | -0.85677400 |
| C | -1.58070500 | 3.61165200  | 0.86860500  |
| H | -1.56455800 | 1.87412800  | 2.13702600  |
| C | -0.35583800 | 3.41290500  | -1.19479900 |
| H | 0.62211300  | 1.53497200  | -1.53707500 |
| C | -1.15244100 | 4.16596200  | -0.33350000 |
| H | -2.20048100 | 4.18954300  | 1.54491200  |
| H | -0.01633500 | 3.83853200  | -2.13234000 |
| H | -1.43527400 | 5.17816000  | -0.59903700 |
| C | 3.66843200  | -0.45351200 | 0.65553800  |
| C | 2.45668600  | -0.33646900 | -0.07556000 |
| C | 2.51404200  | -0.47948000 | -1.47676200 |
| C | 3.73349200  | -0.71907100 | -2.08489700 |
| C | 4.92073200  | -0.82188400 | -1.33223400 |
| C | 4.90356000  | -0.69212200 | 0.04401600  |
| C | 2.02394700  | -0.10146000 | 2.12543800  |
| C | 1.41213500  | -0.10613800 | 0.89837800  |
| H | 1.62327000  | -0.40647000 | -2.08907400 |
| H | 3.77822700  | -0.82900900 | -3.16227900 |
| H | 5.85995800  | -1.00704000 | -1.84060400 |
| H | 5.80882700  | -0.77179600 | 0.63514000  |
| H | 4.03675000  | -0.34306000 | 2.74384200  |
| H | 1.58465800  | 0.03417300  | 3.10307800  |
| N | 3.37064400  | -0.30074400 | 1.98506900  |

#### Cat4-TS5

Sum of electronic and thermal Free Energies =  
-1832.052638 Hartree

Sum of electronic and thermal free energies + the entropy  
correction at 298.15K = -1832.04276 Hartree

|   |             |            |             |
|---|-------------|------------|-------------|
| C | -3.07910300 | 3.00983000 | -0.79839600 |
| C | -3.39842200 | 1.83119000 | -0.11485500 |
| C | -4.26487000 | 1.89923200 | 0.97458000  |
| C | -4.77661800 | 3.14282000 | 1.33269200  |
| C | -4.42532500 | 4.30855100 | 0.63900300  |
| C | -3.56109100 | 4.26271300 | -0.44754900 |

|   |             |             |             |                                                           |            |             |             |
|---|-------------|-------------|-------------|-----------------------------------------------------------|------------|-------------|-------------|
| C | -2.00919500 | 1.37005400  | -1.88469400 | C                                                         | 1.31408700 | -0.46107300 | 2.41426000  |
| C | -2.60816400 | 0.73183100  | -0.73439100 | C                                                         | 4.44953000 | 0.20924200  | 0.44705900  |
| H | -4.54175600 | 1.00963000  | 1.52704400  | C                                                         | 3.84332800 | 1.12596400  | -0.41305000 |
| H | -5.46182300 | 3.21270100  | 2.16940500  | I                                                         | 1.78299300 | 1.39972400  | -0.00419400 |
| H | -4.83728200 | 5.26044300  | 0.95186800  | C                                                         | 5.80865100 | -0.07497400 | 0.27533900  |
| H | -3.27971800 | 5.15211700  | -0.99821900 | C                                                         | 6.51981200 | 0.55358100  | -0.73810100 |
| H | -1.81176700 | 3.32540500  | -2.50966900 | C                                                         | 5.89428900 | 1.46749700  | -1.58868100 |
| H | -1.37421300 | 0.91963600  | -2.63715700 | C                                                         | 4.54301000 | 1.76068000  | -1.43094700 |
| H | -1.58107900 | 0.82785200  | -0.07699700 | H                                                         | 1.04015700 | -1.81393900 | 4.05199800  |
| N | -2.22422700 | 2.65993900  | -1.86016600 | H                                                         | 3.39549000 | -2.59186100 | 4.04784300  |
| C | -3.14208700 | -0.70130800 | -0.84540500 | H                                                         | 5.00751200 | -1.68486300 | 2.42265900  |
| H | -4.12700800 | -0.62814500 | -1.31800800 | H                                                         | 0.29037000 | -0.11332600 | 2.39063400  |
| C | -3.35217600 | -1.38829300 | 0.50100000  | H                                                         | 6.46057100 | 1.95172700  | -2.37565000 |
| C | -2.64408800 | -1.05117300 | 1.65455100  | H                                                         | 4.05592900 | 2.47001800  | -2.09140700 |
| C | -4.27675600 | -2.43506600 | 0.56446700  | H                                                         | 7.57242600 | 0.33180100  | -0.86875100 |
| C | -2.85130900 | -1.75026400 | 2.84363600  | H                                                         | 6.30718300 | -0.78157000 | 0.92865100  |
| H | -1.92664800 | -0.23762200 | 1.63840500  | <b>Cat5-TS1</b>                                           |            |             |             |
| C | -4.48707600 | -3.13221200 | 1.74882700  | Sum of electronic and thermal Free Energies=              |            |             |             |
| H | -4.83513200 | -2.70350500 | -0.32779800 | -1865.33735 Hartree                                       |            |             |             |
| C | -3.77068100 | -2.79246300 | 2.89555300  | Sum of electronic and thermal free energies + the entropy |            |             |             |
| H | -2.29158500 | -1.47362600 | 3.73058700  | correction at 298.15K= -1865.32738 Hartree                |            |             |             |
| H | -5.21099900 | -3.93889200 | 1.77832900  | C                                                         | 2.11597100 | 0.06215300  | 0.44977700  |
| H | -3.93243900 | -3.33352000 | 3.82087600  | C                                                         | 4.18741900 | -2.57308900 | -0.49652900 |
| C | -0.59711000 | -2.78267300 | -2.69158600 | C                                                         | 4.50104100 | -1.40068200 | 0.20766800  |
| C | -0.94009200 | -2.00445000 | -1.55688700 | C                                                         | 5.62570800 | -0.66348200 | -0.16671900 |
| C | 0.01117600  | -1.83916400 | -0.53517700 | C                                                         | 6.39051900 | -1.12260100 | -1.23144100 |
| C | 1.24707500  | -2.45068600 | -0.66410000 | C                                                         | 6.04496000 | -2.29113200 | -1.92974300 |
| C | 1.56507800  | -3.21920200 | -1.80271900 | C                                                         | 4.93160000 | -3.04009000 | -1.57388700 |
| C | 0.65336200  | -3.39388200 | -2.82964100 | H                                                         | 6.66117400 | -2.61667800 | -2.75945800 |
| C | -2.69636300 | -2.05693100 | -2.96453900 | H                                                         | 4.65575100 | -3.94475800 | -2.10225300 |
| C | -2.29434200 | -1.55103300 | -1.75694100 | H                                                         | 5.89146100 | 0.24661700  | 0.36005000  |
| H | -0.22300000 | -1.24043700 | 0.33838900  | H                                                         | 7.27108500 | -0.56786800 | -1.53405700 |
| H | 1.98554500  | -2.34237500 | 0.12350200  | C                                                         | 2.64148100 | -2.36037500 | 1.10691000  |
| H | 2.54232100  | -3.68297700 | -1.87375600 | N                                                         | 3.04318300 | -3.11836000 | 0.09702000  |
| H | 0.89268800  | -3.98342500 | -3.70738500 | H                                                         | 1.77041600 | -2.62751900 | 1.68892700  |
| H | -1.73817000 | -3.27401700 | -4.41571400 | H                                                         | 2.56620200 | -3.95585500 | -0.22213900 |
| H | -3.64504100 | -1.94726200 | -3.46960500 | C                                                         | 3.44236200 | -1.19452900 | 1.19406600  |
| N | -1.68410200 | -2.79278700 | -3.52887000 | H                                                         | 3.56620300 | -0.64980700 | 2.11993800  |
| O | -0.37794600 | 1.28431200  | 0.75293200  | O                                                         | 1.19260500 | 0.20031500  | 1.35188800  |
| H | -0.60526300 | 2.01184500  | 1.34597800  | H                                                         | 1.87149600 | -0.50279200 | -0.46186200 |
| C | 1.74555600  | -1.41286900 | 3.33386500  | C                                                         | 2.99525400 | 1.23929700  | 0.17247600  |
| C | 3.07054400  | -1.84813900 | 3.33006300  | C                                                         | 3.46170400 | 1.45933100  | -1.12255200 |
| C | 3.98074500  | -1.33834500 | 2.41470500  | C                                                         | 3.32083600 | 2.13433300  | 1.19365900  |
| C | 3.57938100  | -0.38232100 | 1.47431800  | C                                                         | 4.24854300 | 2.57504400  | -1.39968300 |
| C | 2.24190700  | 0.02137300  | 1.50807900  | H                                                         | 3.20671600 | 0.75807600  | -1.91138800 |

|                                                           |             |             |             |                                                           |             |             |             |
|-----------------------------------------------------------|-------------|-------------|-------------|-----------------------------------------------------------|-------------|-------------|-------------|
| C                                                         | 4.11436100  | 3.24088600  | 0.91787700  | H                                                         | -2.88228600 | -2.14271600 | -2.39211700 |
| H                                                         | 2.94924900  | 1.95645100  | 2.19748600  | H                                                         | -4.52384400 | -3.58655700 | -1.32083900 |
| C                                                         | 4.57830200  | 3.46276300  | -0.37994900 | C                                                         | -3.61694200 | -0.46137100 | -0.99377700 |
| H                                                         | 4.60546100  | 2.74700500  | -2.40859400 | H                                                         | -3.85312100 | 0.26896700  | -1.77675000 |
| H                                                         | 4.37102500  | 3.93330000  | 1.71137500  | O                                                         | -1.27897500 | -0.15441500 | -1.42063200 |
| H                                                         | 5.19460400  | 4.32864900  | -0.59349900 | H                                                         | -2.01951000 | -0.84803100 | 0.38715900  |
| C                                                         | -4.98390500 | -1.82319500 | -0.30964400 | C                                                         | -2.24669400 | 1.26599800  | 0.27968500  |
| C                                                         | -5.54732100 | -0.64143100 | -0.76515800 | C                                                         | -1.64780000 | 1.41838900  | 1.52898800  |
| C                                                         | -4.82382000 | 0.53939600  | -0.75165500 | C                                                         | -2.76028900 | 2.39075500  | -0.37045900 |
| C                                                         | -3.51416100 | 0.57216800  | -0.28177200 | C                                                         | -1.54977400 | 2.67781100  | 2.11971900  |
| C                                                         | -2.97299200 | -0.63254800 | 0.17359700  | H                                                         | -1.24975800 | 0.54756900  | 2.04167700  |
| C                                                         | -3.68301700 | -1.80967100 | 0.16083800  | C                                                         | -2.67240500 | 3.64642600  | 0.21988300  |
| C                                                         | -2.63029400 | 1.74238600  | -0.20450100 | H                                                         | -3.21999100 | 2.29440500  | -1.34920300 |
| C                                                         | -1.34290800 | 1.53653100  | 0.30632500  | C                                                         | -2.06211300 | 3.79344000  | 1.46570700  |
| I                                                         | -0.98021600 | -0.47155000 | 0.82347500  | H                                                         | -1.07618700 | 2.78416100  | 3.08909800  |
| C                                                         | -2.95584400 | 3.05057100  | -0.58472000 | H                                                         | -3.07488400 | 4.51291900  | -0.29271900 |
| C                                                         | -2.02677600 | 4.07256000  | -0.44116300 | H                                                         | -1.98940700 | 4.77372600  | 1.92280000  |
| C                                                         | -0.76366100 | 3.82261100  | 0.08679100  | C                                                         | 4.65591300  | -2.09234400 | 0.74119400  |
| C                                                         | -0.40353700 | 2.53429200  | 0.47404800  | C                                                         | 5.31411700  | -0.88025700 | 0.87512100  |
| H                                                         | -3.93336200 | 3.26923700  | -0.99040100 | C                                                         | 4.68448300  | 0.30534800  | 0.53434800  |
| H                                                         | -2.29682800 | 5.07786800  | -0.74073600 | C                                                         | 3.38019000  | 0.30836400  | 0.04861400  |
| H                                                         | -0.04803700 | 4.62733900  | 0.20531000  | C                                                         | 2.73551700  | -0.92402400 | -0.08281400 |
| H                                                         | 0.56855900  | 2.32598300  | 0.89773800  | C                                                         | 3.35777600  | -2.09919900 | 0.26195300  |
| F                                                         | -5.43605900 | 1.63252500  | -1.20715300 | C                                                         | 2.59548500  | 1.48126200  | -0.36659000 |
| F                                                         | -6.79496100 | -0.64726200 | -1.21851000 | C                                                         | 1.30015000  | 1.24200400  | -0.83808900 |
| F                                                         | -5.69064100 | -2.94536900 | -0.33133200 | I                                                         | 0.70879900  | -0.77688800 | -0.77276600 |
| F                                                         | -3.13098000 | -2.94389900 | 0.59873500  | C                                                         | 3.03156500  | 2.81301100  | -0.35312700 |
| <b>Cat5-INT1</b>                                          |             |             |             | C                                                         | 2.19965700  | 3.82726800  | -0.80903300 |
| Sum of electronic and thermal Free Energies=              |             |             |             | C                                                         | 0.92936600  | 3.54126100  | -1.30245200 |
| -1865.34762 Hartree                                       |             |             |             | C                                                         | 0.46587300  | 2.22860500  | -1.32693100 |
| Sum of electronic and thermal free energies + the entropy |             |             |             | H                                                         | 4.02024100  | 3.05641600  | 0.00919900  |
| correction at 298.15K=                                    |             |             |             | H                                                         | 2.55357000  | 4.85093800  | -0.78838400 |
| -1865.33761 Hartree                                       |             |             |             | H                                                         | 0.29328000  | 4.33549400  | -1.67533500 |
| C                                                         | -2.22165000 | -0.09584600 | -0.39369000 | H                                                         | -0.51122200 | 1.97686700  | -1.71249100 |
| C                                                         | -5.16590400 | -1.95439700 | -0.05308900 | H                                                         | 5.38713200  | 1.43070900  | 0.69285000  |
| C                                                         | -4.72310800 | -0.63429500 | 0.01339700  | F                                                         | 6.56221300  | -0.86065500 | 1.33421200  |
| C                                                         | -5.31137100 | 0.22306100  | 0.93261100  | F                                                         | 5.27425000  | -3.22160000 | 1.07124900  |
| C                                                         | -6.32297200 | -0.28200600 | 1.75134500  | F                                                         | 2.72102000  | -3.27201500 | 0.13749200  |
| C                                                         | -6.74209900 | -1.61123000 | 1.66050500  | <b>Cat5-TS2</b>                                           |             |             |             |
| C                                                         | -6.16360600 | -2.48465800 | 0.74250700  | Sum of electronic and thermal Free Energies=              |             |             |             |
| H                                                         | -7.53017000 | -1.97009200 | 2.31132300  | -1865.30310 Hartree                                       |             |             |             |
| H                                                         | -6.47402100 | -3.51835500 | 0.65297300  | Sum of electronic and thermal free energies + the entropy |             |             |             |
| H                                                         | -5.00126900 | 1.25778900  | 1.01473900  | correction at 298.15K=                                    |             |             |             |
| H                                                         | -6.79460700 | 0.37330800  | 2.47397700  | -1865.29311 Hartree                                       |             |             |             |
| C                                                         | -3.55174100 | -1.81075900 | -1.60992000 | C                                                         | -2.67542000 | -1.65055200 | 0.24215400  |
| N                                                         | -4.40751800 | -2.60572300 | -1.06418900 | O                                                         | -1.49201700 | -1.41021000 | 1.03847500  |

|   |             |             |             |                                                           |             |             |             |
|---|-------------|-------------|-------------|-----------------------------------------------------------|-------------|-------------|-------------|
| H | -3.06596300 | -2.63734900 | 0.51762600  | F                                                         | 5.60018800  | -0.34750400 | 0.14027400  |
| C | -2.46866800 | -1.61903400 | -1.25512400 | F                                                         | 5.94894700  | 2.19040700  | -0.54464400 |
| C | -1.31507200 | -2.18863700 | -1.79969300 | F                                                         | 3.85551500  | 3.87480900  | -0.81766200 |
| C | -3.44103900 | -1.10409000 | -2.11242100 | F                                                         | 1.32452700  | 2.96616100  | -0.37568300 |
| C | -1.12390800 | -2.21677800 | -3.17726100 | <b>Cat5-TS2'</b>                                          |             |             |             |
| H | -0.56784900 | -2.62618000 | -1.14540000 | Sum of electronic and thermal Free Energies=              |             |             |             |
| C | -3.25284200 | -1.13673000 | -3.49220500 | -1941.74705 Hartree                                       |             |             |             |
| H | -4.35040000 | -0.67435700 | -1.70565600 | Sum of electronic and thermal free energies + the entropy |             |             |             |
| C | -2.09131700 | -1.68556900 | -4.02739900 | correction at 298.15K= -1941.73708 Hartree                |             |             |             |
| H | -0.22198600 | -2.65782400 | -3.58605100 | C                                                         | -2.11498200 | -1.06621500 | -0.48929400 |
| H | -4.01421500 | -0.72889100 | -4.14725300 | C                                                         | -5.73384200 | -0.13009200 | -0.57554400 |
| H | -1.94226500 | -1.70485000 | -5.10084900 | C                                                         | -4.40360700 | 0.27797400  | -0.40220400 |
| C | -4.74539500 | 1.34781800  | 1.26691000  | C                                                         | -4.13980600 | 1.53071300  | 0.15654400  |
| C | -3.68737800 | 0.83315000  | 0.50246000  | C                                                         | -5.21738100 | 2.32306600  | 0.52803800  |
| C | -2.96630700 | 1.69625100  | -0.32700200 | C                                                         | -6.54169800 | 1.89505400  | 0.33642900  |
| C | -3.31837100 | 3.03954300  | -0.34491400 | C                                                         | -6.82488800 | 0.65893700  | -0.22529900 |
| C | -4.36971700 | 3.53196400  | 0.44385300  | H                                                         | -7.35776900 | 2.54334600  | 0.63266900  |
| C | -5.10565800 | 2.69056100  | 1.26507800  | H                                                         | -7.84138800 | 0.31861600  | -0.38180400 |
| C | -4.67483400 | -0.84394600 | 1.72325600  | H                                                         | -3.12093600 | 1.87281500  | 0.29723100  |
| C | -3.58220100 | -0.59353400 | 0.85054700  | H                                                         | -5.03643600 | 3.29448000  | 0.97318400  |
| H | -2.17559000 | 1.33202100  | -0.97320400 | C                                                         | -4.45942100 | -1.81332500 | -1.32075100 |
| H | -2.77606300 | 3.72143300  | -0.98924800 | N                                                         | -5.70735100 | -1.40976200 | -1.13879700 |
| H | -4.61591500 | 4.58622200  | 0.40428600  | H                                                         | -4.23817200 | -2.78592300 | -1.73994200 |
| H | -5.92367900 | 3.05432600  | 1.87506400  | H                                                         | -6.52903100 | -1.93838000 | -1.41536800 |
| H | -6.07001800 | 0.37804300  | 2.64797900  | C                                                         | -3.55139800 | -0.78829100 | -0.95152200 |
| H | -4.96104500 | -1.77717300 | 2.18916000  | H                                                         | -3.29432200 | -0.30232500 | -2.17041300 |
| H | -2.57436000 | -0.65295200 | 1.64670200  | O                                                         | -1.27002300 | -0.02383400 | -0.92717800 |
| N | -5.30864200 | 0.28510100  | 1.98182300  | H                                                         | -1.82446300 | -2.02580000 | -0.94710000 |
| C | 3.64442500  | 2.61145900  | -0.47023100 | C                                                         | -2.08461100 | -1.24584300 | 1.02286900  |
| C | 4.71656100  | 1.74402500  | -0.33014200 | C                                                         | -2.54735900 | -2.44222700 | 1.57412600  |
| C | 4.51572600  | 0.42133100  | 0.02784700  | C                                                         | -1.63578100 | -0.23438700 | 1.86930000  |
| C | 3.23465100  | -0.07178500 | 0.25755800  | C                                                         | -2.56385100 | -2.62459600 | 2.95253100  |
| C | 2.17282600  | 0.82445300  | 0.11524000  | H                                                         | -2.89477100 | -3.23461000 | 0.91661100  |
| C | 2.36483500  | 2.13745200  | -0.24293800 | C                                                         | -1.65003500 | -0.41655500 | 3.25165900  |
| C | 2.86640100  | -1.44312600 | 0.63430100  | H                                                         | -1.27678600 | 0.69828500  | 1.44893100  |
| C | 1.50300500  | -1.71315400 | 0.80543700  | C                                                         | -2.11459200 | -1.60943500 | 3.79631300  |
| I | 0.27938900  | -0.03716800 | 0.47017000  | H                                                         | -2.92210000 | -3.55931000 | 3.36886900  |
| C | 3.75211800  | -2.50877600 | 0.83816600  | H                                                         | -1.29735400 | 0.37687400  | 3.90105000  |
| C | 3.26954800  | -3.76127800 | 1.19370500  | H                                                         | -2.12408200 | -1.75112000 | 4.87094500  |
| C | 1.90510100  | -3.98271600 | 1.35693200  | O                                                         | -2.54765800 | 0.40357400  | -3.00390800 |
| C | 0.99482000  | -2.94644200 | 1.16448200  | H                                                         | -2.27750300 | -0.10844000 | -3.78118900 |
| H | 4.81580200  | -2.35925900 | 0.71905600  | H                                                         | -1.79936500 | 0.35921300  | -2.29886700 |
| H | 3.97008200  | -4.57329800 | 1.34629100  | C                                                         | 0.38936800  | 3.72158500  | 0.15811100  |
| H | 1.53853700  | -4.96250000 | 1.63814800  | C                                                         | 1.68754100  | 4.10603800  | 0.48015600  |
| H | -0.07000200 | -3.08755600 | 1.29163100  | C                                                         | 2.72791200  | 3.18706000  | 0.46083700  |

|   |             |             |             |   |             |             |             |
|---|-------------|-------------|-------------|---|-------------|-------------|-------------|
| C | 2.48481300  | 1.85069900  | 0.11789700  | H | 2.11464200  | 0.66094900  | 1.57434000  |
| C | 1.16357600  | 1.50502300  | -0.19169800 | H | 1.53593800  | 2.92131000  | 2.34376300  |
| C | 0.11075700  | 2.40197700  | -0.18733500 | H | 1.93734900  | 4.90093500  | 0.92113200  |
| C | 3.49250600  | 0.78312400  | 0.04370900  | H | 2.94454400  | 4.65420800  | -1.33894700 |
| C | 3.01899300  | -0.47198300 | -0.34512500 | H | 3.92795700  | 2.70431000  | -3.08550900 |
| I | 0.93015200  | -0.52120000 | -0.69233700 | H | 4.18960100  | 0.21858400  | -3.17970200 |
| C | 4.85387900  | 0.89539900  | 0.31137400  | H | 1.96468300  | -1.79712200 | -2.31889400 |
| C | 5.69594200  | -0.19719000 | 0.19076400  | N | 3.63427400  | 2.09360300  | -2.33508800 |
| C | 5.20222200  | -1.43174700 | -0.20057200 | C | -3.40958400 | 2.38708600  | 0.59340300  |
| C | 3.85058600  | -1.55948800 | -0.46574600 | C | -4.46451400 | 1.48994200  | 0.66102300  |
| H | -0.41701200 | 4.44499500  | 0.17122100  | C | -4.27858300 | 0.14833500  | 0.36913700  |
| H | 1.89563400  | 5.13497400  | 0.74740000  | C | -3.03002700 | -0.34120400 | -0.00265600 |
| H | 3.72875700  | 3.50890100  | 0.71065800  | C | -1.99047200 | 0.59258900  | -0.05082400 |
| H | -0.89077900 | 2.08351600  | -0.43937500 | C | -2.15540500 | 1.92901300  | 0.23126500  |
| F | 5.40818100  | 2.04747900  | 0.69345700  | C | -2.68389200 | -1.72303900 | -0.35140100 |
| F | 6.99239200  | -0.06475500 | 0.44935900  | C | -1.35089800 | -1.97352000 | -0.70154000 |
| F | 6.02434000  | -2.46771900 | -0.31522400 | I | -0.17577300 | -0.23682700 | -0.59818900 |
| F | 3.36883000  | -2.74919700 | -0.84136600 | C | -3.55228800 | -2.82072300 | -0.37202200 |

#### Cat5-INT2

Sum of electronic and thermal Free Energies=  
-1865.37858 Hartree

Sum of electronic and thermal free energies + the entropy  
correction at 298.15K= -1865.36855 Hartree

|   |            |             |             |
|---|------------|-------------|-------------|
| C | 3.17543700 | -1.25154400 | -0.86589300 |
| O | 1.91351200 | -1.77844200 | -1.35183900 |
| H | 3.96900000 | -1.77385400 | -1.40946600 |
| C | 3.29062700 | -1.58194300 | 0.60801700  |
| C | 2.32410200 | -2.32399800 | 1.28286500  |
| C | 4.40126300 | -1.10754900 | 1.31181200  |
| C | 2.45146400 | -2.56421600 | 2.65182600  |
| H | 1.47192800 | -2.72865000 | 0.74970900  |
| C | 4.53308900 | -1.35655700 | 2.67152300  |
| H | 5.15811800 | -0.52991600 | 0.79026700  |
| C | 3.55085600 | -2.07925600 | 3.34956200  |
| H | 1.68758900 | -3.13532600 | 3.16724100  |
| H | 5.39846000 | -0.98122500 | 3.20577200  |
| H | 3.64807700 | -2.26557300 | 4.41292100  |
| C | 3.07366800 | 2.50219100  | -1.14923900 |
| C | 2.84343800 | 1.34604800  | -0.36166700 |
| C | 2.28471000 | 1.51221400  | 0.92369100  |
| C | 1.96767300 | 2.78728700  | 1.35858400  |
| C | 2.19845000 | 3.91716600  | 0.54867100  |
| C | 2.75682600 | 3.79127900  | -0.71034500 |
| C | 3.76240500 | 0.73555400  | -2.33238800 |
| C | 3.28473200 | 0.21882700  | -1.15240500 |

|   |             |             |             |
|---|-------------|-------------|-------------|
| C | -3.07856800 | -4.07755100 | -0.72478700 |
| C | -1.74247400 | -4.27552000 | -1.06137900 |
| C | -0.84637700 | -3.20937800 | -1.05252800 |
| H | -4.59359400 | -2.69337100 | -0.11193500 |
| H | -3.76481000 | -4.91544700 | -0.73489800 |
| H | -1.38513600 | -5.26125600 | -1.33273300 |
| H | 0.19624200  | -3.35190700 | -1.30393600 |
| F | -5.34176100 | -0.64672700 | 0.45702600  |
| F | -5.66590000 | 1.92564300  | 1.01083400  |
| F | -3.60836600 | 3.66614300  | 0.87119100  |
| F | -1.13137200 | 2.77364000  | 0.15888200  |

#### Cat5-TS3

Sum of electronic and thermal Free Energies=  
-1865.33967 Hartree

Sum of electronic and thermal free energies + the entropy  
correction at 298.15K= -1865.32963 Hartree

|   |            |             |            |
|---|------------|-------------|------------|
| C | 2.85354700 | -0.94922600 | 1.47342900 |
| O | 1.26166600 | -1.48381400 | 0.15558200 |
| H | 2.59303400 | -1.83276200 | 2.04665600 |
| C | 2.25778700 | 0.29549400  | 1.95641100 |
| C | 0.99237000 | 0.23703400  | 2.55823200 |
| C | 2.92749100 | 1.52150000  | 1.88832800 |
| C | 0.36792200 | 1.39457100  | 2.99539000 |
| H | 0.50101100 | -0.72450100 | 2.66277900 |
| C | 2.30958800 | 2.67907000  | 2.34875700 |
| H | 3.93840600 | 1.56872300  | 1.50395300 |
| C | 1.02228000 | 2.62184500  | 2.87629400 |

|                                                           |             |             |                     |   |             |             |             |
|-----------------------------------------------------------|-------------|-------------|---------------------|---|-------------|-------------|-------------|
| H                                                         | -0.62128100 | 1.34442400  | 3.43538200          | C | 3.01365700  | -1.02941600 | 1.71291100  |
| H                                                         | 2.83365000  | 3.62595900  | 2.29361100          | O | 1.17062200  | -1.77522000 | -0.53299300 |
| H                                                         | 0.53609600  | 3.52886900  | 3.21710300          | H | 2.78110100  | -2.00372500 | 2.13812900  |
| C                                                         | 5.70487100  | -1.02547700 | -0.85412400         | C | 2.09193000  | 0.02635700  | 2.06596500  |
| C                                                         | 4.61288100  | -0.27317800 | -0.37764500         | C | 0.78019400  | -0.34484000 | 2.40404100  |
| C                                                         | 4.33917900  | 0.95415700  | -0.99642800         | C | 2.45963600  | 1.37989300  | 2.11852200  |
| C                                                         | 5.16747000  | 1.38955200  | -2.02048100         | C | -0.17168500 | 0.62467600  | 2.68360000  |
| C                                                         | 6.26661800  | 0.62942600  | -2.44966800         | H | 0.51735700  | -1.39722900 | 2.41943300  |
| C                                                         | 6.54963000  | -0.59874600 | -1.87311300         | C | 1.51390600  | 2.34349100  | 2.43526800  |
| C                                                         | 4.71882500  | -2.29005200 | 0.70021100          | H | 3.49101100  | 1.66596400  | 1.95423100  |
| C                                                         | 3.98004600  | -1.09259300 | 0.65562400          | C | 0.19280200  | 1.97070700  | 2.68736200  |
| H                                                         | 3.49809200  | 1.56397600  | -0.69207500         | H | -1.19284700 | 0.33510300  | 2.90578400  |
| H                                                         | 4.96023200  | 2.33890700  | -2.50031000         | H | 1.80171400  | 3.38712800  | 2.48274600  |
| H                                                         | 6.89610100  | 1.00287600  | -3.24854400         | H | -0.54793700 | 2.73000000  | 2.91208400  |
| H                                                         | 7.38134800  | -1.21021300 | -2.20212000         | C | 5.85634500  | -0.68054500 | -0.56084000 |
| H                                                         | 6.42477400  | -2.96136900 | -0.28582100         | C | 4.73030000  | -0.03634700 | -0.02049700 |
| H                                                         | 4.55490000  | -3.15306500 | 1.33035500          | C | 4.39564300  | 1.22421100  | -0.51871700 |
| H                                                         | 1.69276900  | -1.86766300 | -0.62073000         | C | 5.20329800  | 1.79559100  | -1.49648400 |
| N                                                         | 5.73192800  | -2.23171300 | -0.15526100         | C | 6.33664000  | 1.13809900  | -1.98737200 |
| C                                                         | 0.63938500  | 2.60718400  | -0.97250400         | C | 6.68006800  | -0.12715100 | -1.52693200 |
| C                                                         | -0.52603500 | 3.36253800  | -1.07529400         | C | 4.94981900  | -2.16408000 | 0.84393200  |
| C                                                         | -1.77382600 | 2.77085400  | -0.92740500         | C | 4.12767000  | -0.99301000 | 0.92009900  |
| C                                                         | -1.87907100 | 1.39947400  | -0.65887800         | H | 3.52450000  | 1.75720600  | -0.16612400 |
| C                                                         | -0.68283300 | 0.68426600  | -0.53647300         | H | 4.94694400  | 2.77405200  | -1.88535500 |
| C                                                         | 0.56824900  | 1.24429300  | -0.69908500         | H | 6.94818300  | 1.61516300  | -2.74363700 |
| C                                                         | -3.12781700 | 0.63754500  | -0.50796100         | H | 7.53901100  | -0.66565700 | -1.90836800 |
| C                                                         | -2.97403700 | -0.72798300 | -0.25544700         | H | 6.67041500  | -2.63902900 | -0.19561700 |
| I                                                         | -0.93815700 | -1.34808600 | -0.06305500         | H | 4.82564000  | -3.09506400 | 1.38042900  |
| C                                                         | -4.42574600 | 1.13160000  | -0.59911700         | H | 1.49210200  | -1.93595600 | -1.42885600 |
| C                                                         | -5.51789300 | 0.29503800  | -0.44012200         | N | 5.94230700  | -1.96059300 | 0.01555400  |
| C                                                         | -5.34233800 | -1.05605500 | -0.18743700         | C | 0.83804900  | 2.46480700  | -1.06131400 |
| C                                                         | -4.05656800 | -1.55875000 | -0.09497300         | C | -0.27316300 | 3.29927600  | -0.99164900 |
| H                                                         | 1.61026000  | 3.07188600  | -1.10310900         | C | -1.54230300 | 2.77418600  | -0.78569100 |
| H                                                         | -0.46534600 | 4.42433700  | -1.28139500         | C | -1.72265900 | 1.39121800  | -0.65165200 |
| H                                                         | -2.66517200 | 3.37436800  | -1.02384200         | C | -0.57980300 | 0.58520300  | -0.72203500 |
| H                                                         | 1.45533100  | 0.63449000  | -0.60934800         | C | 0.69373700  | 1.08652300  | -0.91953900 |
| F                                                         | -4.67966800 | 2.42009800  | -0.84213800         | C | -3.01051100 | 0.70800500  | -0.44703000 |
| F                                                         | -6.74913200 | 0.78805300  | -0.53031300         | C | -2.94375300 | -0.68533800 | -0.37829200 |
| F                                                         | -6.40157700 | -1.84365100 | -0.03716400         | I | -0.92671200 | -1.48086800 | -0.50737200 |
| F                                                         | -3.88635200 | -2.86322300 | 0.15432400          | C | -4.26037400 | 1.30721500  | -0.31770300 |
| <b>Cat5-INT3</b>                                          |             |             |                     | C | -5.39916000 | 0.54183200  | -0.13049500 |
| Sum of electronic and thermal Free Energies=              |             |             |                     | C | -5.31572200 | -0.83957500 | -0.06580500 |
| -1865.348370 Hartree                                      |             |             |                     | C | -4.07534600 | -1.44024000 | -0.19053100 |
| Sum of electronic and thermal free energies + the entropy |             |             |                     | H | 1.82525800  | 2.88305100  | -1.22061900 |
| correction at 298.15K=                                    |             |             | -1865.33829 Hartree | H | -0.15291300 | 4.37074000  | -1.09846300 |

|                                                           |             |             |             |                                               |             |             |             |
|-----------------------------------------------------------|-------------|-------------|-------------|-----------------------------------------------|-------------|-------------|-------------|
| H                                                         | -2.39240700 | 3.43976800  | -0.73700800 | C                                             | -2.50709200 | -1.22953100 | 2.42740300  |
| H                                                         | 1.54658700  | 0.42072600  | -0.94633100 | C                                             | -2.71885500 | 1.16604500  | 2.25589100  |
| F                                                         | -4.42616400 | 2.63387800  | -0.36538400 | H                                             | -2.39167200 | -2.13118700 | 3.01779400  |
| F                                                         | -6.58570500 | 1.13331300  | -0.01100800 | H                                             | -2.76824900 | 2.14835000  | 2.71116100  |
| F                                                         | -6.41870700 | -1.56071300 | 0.11688400  | C                                             | -1.85250500 | 2.76042800  | -0.68670400 |
| F                                                         | -4.00102700 | -2.77923700 | -0.11953600 | N                                             | -2.28322900 | 3.89290400  | -1.24257800 |
| <b>TS4</b>                                                |             |             |             | C                                             | -1.33856500 | -3.05996700 | -0.25634900 |
| Sum of electronic and thermal Free Energies=              |             |             |             | N                                             | -1.55779900 | -4.31851200 | -0.63590300 |
| -996.77109 Hartree                                        |             |             |             | I                                             | -0.00172800 | 1.83114800  | -0.90404800 |
| Sum of electronic and thermal free energies + the entropy |             |             |             | I                                             | 0.32560200  | -1.87786700 | -0.63410600 |
| correction at 298.15K=                                    |             |             |             | C                                             | -1.55574100 | 4.77824200  | -2.14810500 |
| -996.76079 Hartree                                        |             |             |             | H                                             | -1.52126200 | 5.77448800  | -1.70880900 |
| C                                                         | 3.19392500  | 0.52153400  | -0.58954800 | H                                             | -2.07575600 | 4.80644200  | -3.10509800 |
| C                                                         | 6.41516200  | -0.67619600 | -0.88382900 | H                                             | -0.54578000 | 4.40163600  | -2.28612900 |
| C                                                         | 5.54929000  | -0.63785000 | 0.21616500  | C                                             | -0.67291900 | -5.17475800 | -1.42288500 |
| C                                                         | 6.04308500  | -0.22900900 | 1.45407800  | H                                             | -1.04179600 | -5.22751200 | -2.44703100 |
| C                                                         | 7.38347900  | 0.12920500  | 1.54301200  | H                                             | -0.66823800 | -6.16594600 | -0.97255200 |
| C                                                         | 8.22475100  | 0.09693500  | 0.42053800  | H                                             | 0.33361500  | -4.76481300 | -1.40603800 |
| C                                                         | 7.75266500  | -0.30787900 | -0.82176100 | H                                             | -2.58408200 | 0.09755400  | 4.11188900  |
| H                                                         | 9.26288000  | 0.38928600  | 0.52457200  | C                                             | -3.94575500 | 3.08212100  | 0.01759200  |
| H                                                         | 8.39084200  | -0.34035500 | -1.69654200 | C                                             | -3.59009900 | 4.13229300  | -0.82654200 |
| H                                                         | 5.39618300  | -0.18938200 | 2.32361200  | C                                             | -3.36318400 | -3.62158000 | 0.48886700  |
| H                                                         | 7.78876400  | 0.44442900  | 2.49744000  | C                                             | -2.81910600 | -4.70888200 | -0.19287100 |
| C                                                         | 4.42713900  | -1.39274900 | -1.62621000 | N                                             | -2.83627200 | 2.24004100  | 0.07797900  |
| N                                                         | 5.67092100  | -1.14481100 | -1.97955500 | N                                             | -2.41115700 | -2.60548900 | 0.42483700  |
| H                                                         | 3.70357600  | -1.74488600 | -2.34800200 | C                                             | -4.47174200 | 5.16876900  | -1.12280300 |
| H                                                         | 6.03279900  | -1.24346200 | -2.92384800 | C                                             | -5.72250600 | 5.09748700  | -0.53087700 |
| C                                                         | 4.20905200  | -0.99869800 | -0.26817700 | H                                             | -6.44491700 | 5.88005100  | -0.72787700 |
| H                                                         | 3.49527300  | -1.52778500 | 0.35208200  | C                                             | -6.08068200 | 4.03516300  | 0.32005700  |
| O                                                         | 2.04299200  | 0.14007500  | -1.07404600 | H                                             | -7.07137000 | 4.02315000  | 0.75778900  |
| H                                                         | 3.87231100  | 1.04862300  | -1.27849400 | C                                             | -5.20182100 | 3.00452800  | 0.61241300  |
| C                                                         | 3.19236200  | 1.19037100  | 0.76401400  | C                                             | -4.62744800 | -3.66871400 | 1.06978500  |
| C                                                         | 4.04037800  | 2.26861300  | 1.00944800  | C                                             | -5.31893900 | -4.86097300 | 0.93052400  |
| C                                                         | 2.32669500  | 0.75383800  | 1.76888300  | H                                             | -6.30769700 | -4.95068300 | 1.36353700  |
| C                                                         | 4.02453500  | 2.90860300  | 2.24767300  | C                                             | -4.77302600 | -5.95935400 | 0.23972300  |
| H                                                         | 4.71442100  | 2.60786500  | 0.22844300  | H                                             | -5.35405900 | -6.86961600 | 0.15645900  |
| C                                                         | 2.31423500  | 1.38560400  | 3.00677600  | C                                             | -3.51464900 | -5.90741800 | -0.33706700 |
| H                                                         | 1.66124200  | -0.08197800 | 1.57647100  | H                                             | -4.19120500 | 5.98238500  | -1.77988100 |
| C                                                         | 3.16447200  | 2.46583500  | 3.24816300  | H                                             | -5.46956400 | 2.18360300  | 1.26602500  |
| H                                                         | 4.68421400  | 3.74937300  | 2.42992500  | H                                             | -5.03991600 | -2.81854400 | 1.59895900  |
| H                                                         | 1.64198900  | 1.03968200  | 3.78405200  | H                                             | -3.09204800 | -6.74842400 | -0.87222200 |
| H                                                         | 3.15276700  | 2.96021800  | 4.21287200  | H                                             | -2.74090900 | -0.26958800 | -0.83937100 |
| C                                                         | -2.68767900 | -0.18871000 | 0.24075200  |                                               |             |             |             |
| C                                                         | -2.61088500 | 0.01784200  | 3.03263000  | <b>INT4</b>                                   |             |             |             |
| C                                                         | -2.74893500 | 1.04713700  | 0.87192500  | Sum of electronic and thermal Free Energies = |             |             |             |
| C                                                         | -2.54056900 | -1.31439000 | 1.04073100  | -996.797456 Hartree                           |             |             |             |

|                                                                                   |                    |             |             |                                                                                  |             |             |             |
|-----------------------------------------------------------------------------------|--------------------|-------------|-------------|----------------------------------------------------------------------------------|-------------|-------------|-------------|
| Sum of electronic and thermal free energies + the entropy correction at 298.15K = | -996.78726 Hartree | N           | 3.37064400  | -0.30074400                                                                      | 1.98506900  |             |             |
| C                                                                                 | -2.67661100        | -2.12193000 | 0.02926800  | <b>Cat5-TS5</b>                                                                  |             |             |             |
| C                                                                                 | -2.21756800        | -0.85937800 | -0.33968200 | Sum of electronic and thermal Free Energies=                                     |             |             |             |
| C                                                                                 | -3.14375100        | 0.11984800  | -0.67070300 | -2229.020759 Hartree                                                             |             |             |             |
| C                                                                                 | -4.49938300        | -0.20663600 | -0.60168000 | Sum of electronic and thermal free energies + the entropy correction at 298.15K= |             |             |             |
| C                                                                                 | -4.92678600        | -1.47970100 | -0.21760700 | -2229.01077 Hartree                                                              |             |             |             |
| C                                                                                 | -4.00996700        | -2.47727000 | 0.10553500  | C                                                                                | 4.98981500  | -1.62319000 | 1.07708300  |
| C                                                                                 | -0.43568200        | -2.28519400 | 0.09896300  | C                                                                                | 4.51470800  | -0.60807100 | 0.23664100  |
| C                                                                                 | -0.71016400        | -0.87515100 | -0.29436900 | C                                                                                | 5.33024800  | 0.50238600  | 0.00891800  |
| H                                                                                 | -2.82994100        | 1.10951900  | -0.98056500 | C                                                                                | 6.57035500  | 0.55342100  | 0.63593100  |
| H                                                                                 | -5.23745000        | 0.54498000  | -0.85528700 | C                                                                                | 7.00526500  | -0.46795900 | 1.49181800  |
| H                                                                                 | -5.98677600        | -1.69887800 | -0.17587800 | C                                                                                | 6.21525100  | -1.58391500 | 1.72858000  |
| H                                                                                 | -4.31769600        | -3.47437800 | 0.39530900  | C                                                                                | 3.00515500  | -2.33105300 | 0.32537800  |
| H                                                                                 | -1.58209400        | -3.91065600 | 0.56684500  | C                                                                                | 3.14234100  | -0.99377800 | -0.19203600 |
| H                                                                                 | 0.53069500         | -2.75126400 | 0.24880000  | H                                                                                | 5.01726700  | 1.30576300  | -0.64515000 |
| H                                                                                 | -0.27768700        | -0.70145400 | -1.28675700 | H                                                                                | 7.21696800  | 1.40490100  | 0.45901700  |
| N                                                                                 | -1.53437300        | -2.93166200 | 0.28141900  | H                                                                                | 7.97452100  | -0.38907000 | 1.96930400  |
| C                                                                                 | -0.06920200        | 0.11980000  | 0.72448200  | H                                                                                | 6.53456100  | -2.38955500 | 2.37860100  |
| H                                                                                 | -0.53955500        | -0.08251400 | 1.69116900  | H                                                                                | 4.08079600  | -3.48293800 | 1.65888600  |
| C                                                                                 | -0.42585200        | 1.54763200  | 0.34560800  | H                                                                                | 2.15986700  | -2.99995200 | 0.23427600  |
| C                                                                                 | -1.21941300        | 2.30814800  | 1.20396300  | H                                                                                | 2.44598900  | -0.53911500 | 0.74722600  |
| C                                                                                 | 0.00524700         | 2.11267400  | -0.85677400 | N                                                                                | 4.02014000  | -2.63693400 | 1.09767500  |
| C                                                                                 | -1.58070500        | 3.61165200  | 0.86860500  | C                                                                                | 2.56966700  | -0.59566200 | -1.56511300 |
| H                                                                                 | -1.56455800        | 1.87412800  | 2.13702600  | H                                                                                | 3.27630100  | -0.99246900 | -2.30208100 |
| C                                                                                 | -0.35583800        | 3.41290500  | -1.19479900 | C                                                                                | 2.52283000  | 0.90868300  | -1.77925500 |
| H                                                                                 | 0.62211300         | 1.53497200  | -1.53707500 | C                                                                                | 2.39141600  | 1.82182600  | -0.73439000 |
| C                                                                                 | -1.15244100        | 4.16596200  | -0.33350000 | C                                                                                | 2.53251300  | 1.38563000  | -3.09238400 |
| H                                                                                 | -2.20048100        | 4.18954300  | 1.54491200  | C                                                                                | 2.25437800  | 3.18423700  | -0.99761200 |
| H                                                                                 | -0.01633500        | 3.83853200  | -2.13234000 | H                                                                                | 2.38419500  | 1.48044600  | 0.29436800  |
| H                                                                                 | -1.43527400        | 5.17816000  | -0.59903700 | C                                                                                | 2.39144500  | 2.74302000  | -3.35874200 |
| C                                                                                 | 3.66843200         | -0.45351200 | 0.65553800  | H                                                                                | 2.63509800  | 0.68074600  | -3.91227800 |
| C                                                                                 | 2.45668600         | -0.33646900 | -0.07556000 | C                                                                                | 2.24666900  | 3.64898000  | -2.30880800 |
| C                                                                                 | 2.51404200         | -0.47948000 | -1.47676200 | H                                                                                | 2.14846800  | 3.88030400  | -0.17263200 |
| C                                                                                 | 3.73349200         | -0.71907100 | -2.08489700 | H                                                                                | 2.39441500  | 3.09464200  | -4.38433300 |
| C                                                                                 | 4.92073200         | -0.82188400 | -1.33223400 | H                                                                                | 2.13556600  | 4.70780600  | -2.51304600 |
| C                                                                                 | 4.90356000         | -0.69212200 | 0.04401600  | C                                                                                | -0.98651400 | -1.67329400 | -2.33919500 |
| C                                                                                 | 2.02394700         | -0.10146000 | 2.12543800  | C                                                                                | -0.08809100 | -0.62004800 | -2.02218400 |
| C                                                                                 | 1.41213500         | -0.10613800 | 0.89837800  | C                                                                                | -0.61880600 | 0.68693500  | -1.93861500 |
| H                                                                                 | 1.62327000         | -0.40647000 | -2.08907400 | C                                                                                | -1.96680700 | 0.88820900  | -2.17801300 |
| H                                                                                 | 3.77822700         | -0.82900900 | -3.16227900 | C                                                                                | -2.83078400 | -0.17990900 | -2.49381000 |
| H                                                                                 | 5.85995800         | -1.00704000 | -1.84060400 | C                                                                                | -2.35230700 | -1.47374000 | -2.57175700 |
| H                                                                                 | 5.80882700         | -0.77179600 | 0.63514000  | C                                                                                | 1.04655200  | -2.56723300 | -2.11410000 |
| H                                                                                 | 4.03675000         | -0.34306000 | 2.74384200  | C                                                                                | 1.21975100  | -1.22717800 | -1.86643700 |
| H                                                                                 | 1.58465800         | 0.03417300  | 3.10307800  | H                                                                                | 0.00824900  | 1.53480500  | -1.69211900 |
|                                                                                   |                    |             |             | H                                                                                | -2.37067600 | 1.89317500  | -2.11276200 |



|                                                           |             |             |             |                                                           |             |             |             |
|-----------------------------------------------------------|-------------|-------------|-------------|-----------------------------------------------------------|-------------|-------------|-------------|
| H                                                         | -3.88196100 | 0.01666200  | -2.67431000 | N                                                         | 2.63208800  | -2.97536100 | -0.23714900 |
| H                                                         | -3.00132100 | -2.31000700 | -2.80889200 | H                                                         | 1.31387600  | -2.80785600 | 1.38789400  |
| H                                                         | -0.64005400 | -3.75198400 | -2.60258100 | H                                                         | 2.22283300  | -3.79254400 | -0.67850200 |
| H                                                         | 1.78106200  | -3.36014700 | -2.12964400 | C                                                         | 2.88569500  | -1.21193400 | 1.13408000  |
| N                                                         | -0.26681500 | -2.83975500 | -2.37917500 | H                                                         | 2.92710700  | -0.75999700 | 2.11484600  |
| O                                                         | 1.64745000  | -0.03396300 | 1.87179300  | O                                                         | 0.51573800  | 0.06918800  | 1.38746600  |
| H                                                         | 1.98138000  | -0.26550100 | 2.74832900  | H                                                         | 1.25753300  | -0.39584000 | -0.48020600 |
| C                                                         | -0.28214500 | 3.78224000  | 1.78744900  | C                                                         | 2.27384300  | 1.32244500  | 0.37635900  |
| C                                                         | -1.57913600 | 4.15258900  | 1.44430300  | C                                                         | 2.76673600  | 1.70113400  | -0.87220700 |
| C                                                         | -2.53784500 | 3.19352000  | 1.14459100  | C                                                         | 2.52173900  | 2.11479500  | 1.49991700  |
| C                                                         | -2.20993400 | 1.83231600  | 1.17816000  | C                                                         | 3.50187600  | 2.87660000  | -1.00097700 |
| C                                                         | -0.89002800 | 1.50446400  | 1.51364800  | H                                                         | 2.57048200  | 1.07669000  | -1.73847400 |
| C                                                         | 0.07951700  | 2.43781400  | 1.82711300  | C                                                         | 3.26758500  | 3.27893600  | 1.37042100  |
| C                                                         | -3.12027300 | 0.71848600  | 0.88146600  | H                                                         | 2.13174900  | 1.81142700  | 2.46547100  |
| C                                                         | -2.56840300 | -0.55927500 | 0.99769500  | C                                                         | 3.75609600  | 3.66158400  | 0.11968800  |
| I                                                         | -0.51491700 | -0.56151300 | 1.51705800  | H                                                         | 3.87854700  | 3.17476600  | -1.97244500 |
| C                                                         | -4.44080600 | 0.80639000  | 0.45259000  | H                                                         | 3.46771600  | 3.89238100  | 2.24123200  |
| C                                                         | -5.17025700 | -0.33232700 | 0.15405700  | H                                                         | 4.33412600  | 4.57341200  | 0.02198500  |
| C                                                         | -4.59870900 | -1.58919500 | 0.27011900  | C                                                         | -1.74343100 | 3.29630800  | -0.38118100 |
| C                                                         | -3.28573100 | -1.69043800 | 0.69262900  | C                                                         | -2.99253600 | 3.31655000  | -0.98668800 |
| H                                                         | 0.45829000  | 4.53633800  | 2.02585100  | C                                                         | -3.79114200 | 2.17904300  | -1.03919100 |
| H                                                         | -1.85121100 | 5.20069400  | 1.41318700  | C                                                         | -3.31532000 | 0.99648600  | -0.48466600 |
| H                                                         | -3.54147400 | 3.50223900  | 0.88906300  | C                                                         | -2.04662400 | 0.99322200  | 0.10731300  |
| H                                                         | 1.08100100  | 2.12529300  | 2.08703900  | C                                                         | -1.25589300 | 2.12087600  | 0.18403200  |
| F                                                         | -5.05731700 | 1.98028100  | 0.28933100  | C                                                         | -3.43411400 | -1.30122200 | 0.21372000  |
| F                                                         | -6.42694300 | -0.22210000 | -0.26616700 | I                                                         | -1.49563200 | -0.86913500 | 0.90926000  |
| F                                                         | -5.30580300 | -2.67078000 | -0.03993100 | C                                                         | -4.29317200 | -2.37759700 | 0.15296800  |
| F                                                         | -2.72075800 | -2.90113800 | 0.77926100  | H                                                         | -1.13937000 | 4.19369800  | -0.33483200 |
| <b>Cat6-TS1</b>                                           |             |             |             | H                                                         | -3.36958500 | 4.23337500  | -1.42202000 |
| Sum of electronic and thermal Free Energies=              |             |             |             | H                                                         | -4.14818100 | -3.36550700 | 0.55621400  |
| -1502.02948 Hartree                                       |             |             |             | H                                                         | -4.76202400 | 2.23952800  | -1.50253100 |
| Sum of electronic and thermal free energies + the entropy |             |             |             | H                                                         | -0.29617900 | 2.09986800  | 0.68028000  |
| correction at 298.15K=                                    |             |             |             | N                                                         | -5.20475500 | -0.62842000 | -0.89127900 |
| -1502.01948 Hartree                                       |             |             |             | C                                                         | -6.11739800 | 0.20864700  | -1.67148600 |
| C                                                         | 1.44743500  | 0.09162000  | 0.48545100  | H                                                         | -6.95266100 | -0.43477600 | -1.93752800 |
| C                                                         | 3.74301400  | -2.27782600 | -0.71679100 | H                                                         | -6.47143900 | 1.03686000  | -1.06054800 |
| C                                                         | 3.96491000  | -1.19923600 | 0.15500800  | H                                                         | -5.61446000 | 0.55151700  | -2.57374100 |
| C                                                         | 5.04031200  | -0.34046900 | -0.08410100 | C                                                         | -5.39620900 | -1.90584800 | -0.55161300 |
| C                                                         | 5.84971500  | -0.58838300 | -1.18448300 | H                                                         | -6.31120300 | -2.40064400 | -0.84071700 |
| C                                                         | 5.59692700  | -1.66587000 | -2.05033000 | N                                                         | -3.99435000 | -0.24927000 | -0.42111300 |
| C                                                         | 4.53481700  | -2.53203100 | -1.83202900 | <b>Cat6-INT1</b>                                          |             |             |             |
| H                                                         | 6.24634400  | -1.82618300 | -2.90277600 | Sum of electronic and thermal Free Energies=              |             |             |             |
| H                                                         | 4.33135300  | -3.36757100 | -2.49096100 | -1502.04542 Hartree                                       |             |             |             |
| H                                                         | 5.23322100  | 0.50090000  | 0.57274100  | Sum of electronic and thermal free energies + the entropy |             |             |             |
| H                                                         | 6.69240400  | 0.06297900  | -1.38514200 | correction at 298.15K=                                    |             |             |             |
| C                                                         | 2.16339300  | -2.39357300 | 0.86279000  | -1502.03539 Hartree                                       |             |             |             |

|   |             |             |             |                                                           |             |             |             |
|---|-------------|-------------|-------------|-----------------------------------------------------------|-------------|-------------|-------------|
| C | -1.66768600 | -0.16833600 | -0.34001900 | C                                                         | 6.03006900  | 0.14077600  | 1.30678700  |
| C | -4.91480500 | -1.42527300 | 0.02962700  | H                                                         | 6.78482500  | -0.39675600 | 1.87613400  |
| C | -4.23993900 | -0.20961600 | -0.06833800 | H                                                         | 6.45588900  | 0.48305400  | 0.36533500  |
| C | -4.71695200 | 0.88013700  | 0.64601700  | H                                                         | 5.64367100  | 0.96666400  | 1.90105100  |
| C | -5.85613900 | 0.70378400  | 1.43354500  | C                                                         | 4.95518000  | -2.11132500 | 1.41071500  |
| C | -6.50858100 | -0.52862600 | 1.51052200  | H                                                         | 5.80954100  | -2.51889400 | 1.92993200  |
| C | -6.04427600 | -1.63203400 | 0.79832100  | N                                                         | 3.78770700  | -0.56614100 | 0.42468100  |
| H | -7.39089300 | -0.62954100 | 2.13071500  | <b>Cat6-TS2</b>                                           |             |             |             |
| H | -6.53595600 | -2.59596800 | 0.84019300  | Sum of electronic and thermal Free Energies=              |             |             |             |
| H | -4.22645400 | 1.84458900  | 0.59477300  | -1502.00268 Hartree                                       |             |             |             |
| H | -6.24387600 | 1.54373400  | 1.99759400  | Sum of electronic and thermal free energies + the entropy |             |             |             |
| C | -3.20749400 | -1.83113400 | -1.37456700 | correction at 298.15K= -1501.99269 Hartree                |             |             |             |
| N | -4.22786600 | -2.36020000 | -0.79244700 | C                                                         | -1.51234500 | -0.13877600 | -0.59845600 |
| H | -2.56549500 | -2.40088900 | -2.03319300 | O                                                         | -0.68307700 | -0.31257300 | 0.57653200  |
| H | -4.51000500 | -3.33482200 | -0.90393900 | H                                                         | -1.01702900 | -0.56174900 | -1.47861500 |
| C | -3.06251300 | -0.40240900 | -0.98907100 | C                                                         | -1.89369100 | 1.29763200  | -0.86145400 |
| H | -3.12619000 | 0.20631700  | -1.89938800 | C                                                         | -1.77154700 | 2.27820600  | 0.12129700  |
| O | -0.69349700 | -0.54940000 | -1.27959000 | C                                                         | -2.42025400 | 1.63544900  | -2.10885800 |
| H | -1.62863900 | -0.80792900 | 0.55574200  | C                                                         | -2.16904600 | 3.58732700  | -0.14284700 |
| C | -1.48382500 | 1.26920500  | 0.10972600  | H                                                         | -1.39861800 | 2.01869300  | 1.10641100  |
| C | -0.91469800 | 1.52155000  | 1.35692500  | C                                                         | -2.82657600 | 2.93962900  | -2.36866800 |
| C | -1.77582400 | 2.34192700  | -0.73627700 | H                                                         | -2.51541300 | 0.87124400  | -2.87439000 |
| C | -0.62601800 | 2.82694000  | 1.75291700  | C                                                         | -2.69912300 | 3.91989500  | -1.38569000 |
| H | -0.69209400 | 0.69245000  | 2.02231500  | H                                                         | -2.07077600 | 4.34382500  | 0.62729200  |
| C | -1.49717600 | 3.64504100  | -0.34009400 | H                                                         | -3.23755500 | 3.19288200  | -3.33919800 |
| H | -2.21067700 | 2.16698500  | -1.71547000 | H                                                         | -3.01096600 | 4.93774900  | -1.58944800 |
| C | -0.91659500 | 3.89015400  | 0.90435300  | C                                                         | -4.74227800 | -1.90759300 | 0.30836300  |
| H | -0.17906700 | 3.01015100  | 2.72342700  | C                                                         | -4.03995100 | -0.69222100 | 0.25415700  |
| H | -1.72807000 | 4.47101000  | -1.00328900 | C                                                         | -4.71433800 | 0.48700400  | 0.58723600  |
| H | -0.69608900 | 4.90665000  | 1.20973000  | C                                                         | -6.04709400 | 0.40123100  | 0.96651600  |
| C | 2.08442700  | 2.74853100  | -1.51680400 | C                                                         | -6.71727900 | -0.83003300 | 1.03089800  |
| C | 3.34550500  | 2.89314500  | -0.95240600 | C                                                         | -6.07123700 | -2.01187200 | 0.70271900  |
| C | 3.96715400  | 1.83903900  | -0.29105100 | C                                                         | -2.68853600 | -2.42815900 | -0.40666600 |
| C | 3.29813500  | 0.62442200  | -0.17800800 | C                                                         | -2.66562600 | -1.02929600 | -0.14927400 |
| C | 2.01458600  | 0.50667500  | -0.72104800 | H                                                         | -4.21841900 | 1.44816800  | 0.55207100  |
| C | 1.40719100  | 1.53694200  | -1.40937400 | H                                                         | -6.58324800 | 1.30808100  | 1.22063500  |
| C | 3.04665100  | -1.69325900 | 0.39332000  | H                                                         | -7.75593500 | -0.85732400 | 1.33776500  |
| I | 1.08940300  | -1.35869500 | -0.45299300 | H                                                         | -6.57148700 | -2.97188200 | 0.74213200  |
| C | 3.75975100  | -2.70082500 | 1.01805400  | H                                                         | -4.10954900 | -3.91105200 | -0.12416600 |
| H | 1.62119100  | 3.57113700  | -2.04772900 | H                                                         | -1.88242700 | -3.05972700 | -0.75709600 |
| H | 3.87221200  | 3.83582000  | -1.03351500 | H                                                         | -1.79752400 | -1.05721300 | 0.86551000  |
| H | 3.45886500  | -3.72360500 | 1.17014100  | N                                                         | -3.87219700 | -2.92361200 | -0.09865100 |
| H | 4.95419000  | 1.98539600  | 0.11558700  | C                                                         | 1.97335700  | -3.39666400 | -0.88335400 |
| H | 0.43112000  | 1.39149800  | -1.84908300 | C                                                         | 3.34482400  | -3.39459000 | -1.10014000 |
| N | 4.96228000  | -0.82417500 | 1.04999900  | C                                                         | 4.12409000  | -2.28337400 | -0.79684700 |

|   |            |             |             |   |             |             |             |
|---|------------|-------------|-------------|---|-------------|-------------|-------------|
| C | 3.51041300 | -1.15185900 | -0.27040300 | C | 1.71053900  | 2.23631400  | 0.57871000  |
| C | 2.12469500 | -1.16695200 | -0.07349000 | C | 2.16420100  | 2.97561000  | -2.06714300 |
| C | 1.34676800 | -2.26861600 | -0.36167600 | H | 1.77231100  | 0.91241100  | -2.54277900 |
| C | 3.40887100 | 1.07839300  | 0.61597800  | C | 2.02624400  | 3.55657800  | 0.26813100  |
| I | 1.33799200 | 0.62249000  | 0.69387200  | H | 1.53873100  | 1.95470500  | 1.61287900  |
| C | 4.24692900 | 2.13511700  | 0.90758700  | C | 2.26008800  | 3.92713900  | -1.05423000 |
| H | 1.38111000 | -4.27268500 | -1.11623700 | H | 2.33445800  | 3.26069300  | -3.09909600 |
| H | 3.83104500 | -4.27119400 | -1.50947700 | H | 2.09355300  | 4.29451100  | 1.05944100  |
| H | 3.98309000 | 3.09459000  | 1.31927800  | H | 2.50784900  | 4.95460000  | -1.29486700 |
| H | 5.18625500 | -2.32412500 | -0.97584600 | O | 2.31102500  | -0.53208500 | 2.71458000  |
| H | 0.28319400 | -2.25272600 | -0.17506100 | H | 2.34657900  | -1.27578500 | 3.33824700  |
| N | 4.14163800 | 0.06220500  | 0.11346100  | H | 1.36905900  | -0.41461900 | 2.39858400  |
| N | 5.44063600 | 0.44250400  | 0.07798300  | C | -1.94540800 | -3.51076200 | -0.54483800 |
| C | 5.51547600 | 1.68879500  | 0.55414200  | C | -3.27047100 | -3.52317600 | -0.96053300 |
| H | 6.47645400 | 2.17707100  | 0.61037600  | C | -4.06469000 | -2.38424300 | -0.87998900 |
| C | 6.56326100 | -0.37607200 | -0.38007700 | C | -3.51011100 | -1.20905800 | -0.38409800 |
| H | 6.64274500 | -1.26877900 | 0.23778600  | C | -2.17262200 | -1.21263900 | 0.02750100  |
| H | 6.43759100 | -0.61869600 | -1.43345800 | C | -1.38385700 | -2.34319400 | -0.03602500 |
| H | 7.44941900 | 0.24016200  | -0.24921800 | C | -3.52583600 | 1.07099600  | 0.36747300  |

#### Cat6-TS2'

Sum of electronic and thermal Free Energies=  
-1578.43860 Hartree

Sum of electronic and thermal free energies + the entropy  
correction at 298.15K= -1578.42859 Hartree

|   |            |             |             |
|---|------------|-------------|-------------|
| C | 1.34897000 | -0.17751200 | -0.10721900 |
| C | 4.79108000 | -1.73606800 | -0.24574100 |
| C | 4.04389800 | -0.54804700 | -0.15347700 |
| C | 4.72176400 | 0.67259200  | -0.29047800 |
| C | 6.08801100 | 0.65082400  | -0.52714700 |
| C | 6.80558100 | -0.55390600 | -0.61308700 |
| C | 6.16543800 | -1.77231200 | -0.46587800 |
| H | 7.87358100 | -0.52846400 | -0.79356700 |
| H | 6.69856700 | -2.71394200 | -0.51896800 |
| H | 4.20343000 | 1.61944500  | -0.21283600 |
| H | 6.61710200 | 1.58942800  | -0.64432900 |
| C | 2.68232800 | -2.36362600 | 0.13525500  |
| N | 3.91493300 | -2.80369300 | -0.06314300 |
| H | 1.86352100 | -3.05442300 | 0.28667200  |
| H | 4.18956500 | -3.78115800 | -0.04511000 |
| C | 2.65896000 | -0.94610900 | 0.16980000  |
| H | 2.69009700 | -0.86268000 | 1.54269600  |
| O | 0.46953400 | -0.32121700 | 1.00347700  |
| H | 0.88399800 | -0.63561700 | -0.98980800 |
| C | 1.62710800 | 1.27874300  | -0.43209700 |
| C | 1.84448600 | 1.65713300  | -1.75579700 |

|   |             |             |             |
|---|-------------|-------------|-------------|
| C | 1.71053900  | 2.23631400  | 0.57871000  |
| C | 2.16420100  | 2.97561000  | -2.06714300 |
| H | 1.77231100  | 0.91241100  | -2.54277900 |
| C | 2.02624400  | 3.55657800  | 0.26813100  |
| H | 1.53873100  | 1.95470500  | 1.61287900  |
| C | 2.26008800  | 3.92713900  | -1.05423000 |
| H | 2.33445800  | 3.26069300  | -3.09909600 |
| H | 2.09355300  | 4.29451100  | 1.05944100  |
| H | 2.50784900  | 4.95460000  | -1.29486700 |
| O | 2.31102500  | -0.53208500 | 2.71458000  |
| H | 2.34657900  | -1.27578500 | 3.33824700  |
| H | 1.36905900  | -0.41461900 | 2.39858400  |
| C | -1.94540800 | -3.51076200 | -0.54483800 |
| C | -3.27047100 | -3.52317600 | -0.96053300 |
| C | -4.06469000 | -2.38424300 | -0.87998900 |
| C | -3.51011100 | -1.20905800 | -0.38409800 |
| C | -2.17262200 | -1.21263900 | 0.02750100  |
| C | -1.38385700 | -2.34319400 | -0.03602500 |
| C | -3.52583600 | 1.07099600  | 0.36747300  |
| I | -1.47774800 | 0.61506900  | 0.78976600  |
| C | -4.38558300 | 2.15161600  | 0.42095300  |
| H | -1.34252100 | -4.40826400 | -0.60384000 |
| H | -3.70915900 | -4.43371800 | -1.34903000 |
| H | -4.18801300 | 3.13319700  | 0.81742300  |
| H | -5.09375000 | -2.43981800 | -1.19512600 |
| H | -0.36387300 | -2.31138300 | 0.31791100  |
| N | -5.42628400 | 0.42708600  | -0.53599100 |
| C | -6.42856900 | -0.39129200 | -1.21757000 |
| H | -7.27966500 | 0.26364700  | -1.38842000 |
| H | -6.03204700 | -0.73451300 | -2.17131700 |
| H | -6.72471300 | -1.22152300 | -0.57943900 |
| C | -5.56707000 | 1.70057000  | -0.15594500 |
| H | -6.50616300 | 2.20399600  | -0.33006700 |
| N | -4.17053300 | 0.03661000  | -0.21179700 |

#### Cat6-INT2

Sum of electronic and thermal Free Energies=  
-1502.06333 Hartree

Sum of electronic and thermal free energies + the entropy  
correction at 298.15K= -1502.05335 Hartree

|   |             |             |             |
|---|-------------|-------------|-------------|
| C | -1.64193800 | -0.01610800 | 0.52896800  |
| O | -0.84027300 | 0.08918300  | -0.67683400 |
| H | -0.97030100 | 0.31519200  | 1.32762100  |
| C | -2.03461100 | -1.46039500 | 0.79730000  |
| C | -1.84476100 | -2.47802800 | -0.13400700 |
| C | -2.61154600 | -1.76416700 | 2.03308600  |

|   |             |             |             |                                                           |             |             |             |
|---|-------------|-------------|-------------|-----------------------------------------------------------|-------------|-------------|-------------|
| C | -2.23049600 | -3.78551400 | 0.16479300  | H                                                         | 7.47835500  | 0.26055700  | 0.29915500  |
| H | -1.41797600 | -2.26533300 | -1.10815500 | <b>Cat6-TS3</b>                                           |             |             |             |
| C | -2.99310600 | -3.06594200 | 2.33132200  | Sum of electronic and thermal Free Energies=              |             |             |             |
| H | -2.76125700 | -0.97228500 | 2.76083100  | -1502.03543 Hartree                                       |             |             |             |
| C | -2.80352000 | -4.08273000 | 1.39526200  | Sum of electronic and thermal free energies + the entropy |             |             |             |
| H | -2.08287800 | -4.56775200 | -0.57097000 | correction at 298.15K= -1502.02536 Hartree                |             |             |             |
| H | -3.43833700 | -3.28908400 | 3.29417600  | C                                                         | -2.20120900 | -0.84560800 | -1.48584300 |
| H | -3.10203400 | -5.09859100 | 1.62679600  | O                                                         | -0.77816500 | -1.51893500 | -0.17707800 |
| C | -4.78941500 | 1.94746000  | -0.00957300 | H                                                         | -2.02887800 | -1.72874000 | -2.09316000 |
| C | -4.01867400 | 0.79326000  | -0.28981800 | C                                                         | -1.49600500 | 0.35550800  | -1.94438900 |
| C | -4.53384900 | -0.16915400 | -1.17685800 | C                                                         | -0.24210500 | 0.19641400  | -2.55086200 |
| C | -5.77795400 | 0.04453200  | -1.74377600 | C                                                         | -2.04883800 | 1.63550600  | -1.84338500 |
| C | -6.52742700 | 1.20145500  | -1.44809100 | C                                                         | 0.48901700  | 1.30225100  | -2.95692200 |
| C | -6.04657300 | 2.16653400  | -0.58095800 | H                                                         | 0.15414300  | -0.80355000 | -2.69427100 |
| C | -2.88825800 | 2.10636200  | 1.16047300  | C                                                         | -1.32432800 | 2.74276800  | -2.27142600 |
| C | -2.80105400 | 0.92144200  | 0.47485800  | H                                                         | -3.05179700 | 1.76800100  | -1.45888500 |
| H | -3.96761600 | -1.06305100 | -1.41471400 | C                                                         | -0.04702700 | 2.58139600  | -2.80116000 |
| H | -6.18739300 | -0.68984000 | -2.42779400 | H                                                         | 1.46768000  | 1.17095700  | -3.40365400 |
| H | -7.49872500 | 1.33695500  | -1.90971700 | H                                                         | -1.75825600 | 3.73238000  | -2.18965600 |
| H | -6.61724000 | 3.05841000  | -0.34884700 | H                                                         | 0.52139400  | 3.44866100  | -3.11724700 |
| H | -4.38531800 | 3.59700000  | 1.27137800  | C                                                         | -5.12832800 | -0.70286900 | 0.75321900  |
| H | -2.18326500 | 2.55216100  | 1.84723900  | C                                                         | -3.95255900 | -0.04784000 | 0.33312300  |
| H | -1.40510700 | 0.13710500  | -1.46485900 | C                                                         | -3.58608600 | 1.13307200  | 0.99548300  |
| N | -4.07372400 | 2.72107100  | 0.87405400  | C                                                         | -4.40212200 | 1.61792700  | 2.00662100  |
| C | 1.67154500  | 3.41571700  | 0.57834500  | C                                                         | -5.58153900 | 0.95450100  | 2.38145100  |
| C | 3.02764600  | 3.55491200  | 0.84266100  | C                                                         | -5.96122100 | -0.22377000 | 1.75955100  |
| C | 3.91750700  | 2.50191300  | 0.65991300  | C                                                         | -4.22164500 | -2.00815600 | -0.81446100 |
| C | 3.43137300  | 1.28349700  | 0.20107300  | C                                                         | -3.37208400 | -0.89545900 | -0.70758400 |
| C | 2.05804500  | 1.16706700  | -0.04366100 | H                                                         | -2.68519000 | 1.67296100  | 0.73246800  |
| C | 1.16247100  | 2.20047100  | 0.12755700  | H                                                         | -4.12276100 | 2.53116800  | 2.51887700  |
| C | 3.55799300  | -1.03158300 | -0.46282500 | H                                                         | -6.19806000 | 1.36507500  | 3.17217300  |
| I | 1.52260900  | -0.76701200 | -0.66611900 | H                                                         | -6.85856700 | -0.76045800 | 2.04365300  |
| C | 4.47763200  | -2.03621800 | -0.63990600 | H                                                         | -6.01655800 | -2.53816000 | 0.10235100  |
| H | 0.99439500  | 4.24828100  | 0.72121000  | H                                                         | -4.12456200 | -2.86292700 | -1.46905600 |
| H | 3.41462000  | 4.50101200  | 1.19927300  | H                                                         | -1.27313500 | -1.87722700 | 0.57607300  |
| H | 4.30573100  | -3.05078100 | -0.95748500 | N                                                         | -5.25229200 | -1.87700100 | 0.01541200  |
| H | 4.96308000  | 2.65020000  | 0.87760800  | C                                                         | 0.28374000  | 2.44439300  | 1.07207700  |
| H | 0.10907500  | 2.07833200  | -0.08430200 | C                                                         | 1.52820000  | 3.05084900  | 1.18959000  |
| N | 4.17564000  | 0.10110000  | -0.05518100 | C                                                         | 2.70578500  | 2.32653000  | 1.03148500  |
| N | 5.49806600  | -0.16255000 | 0.02630100  | C                                                         | 2.62839600  | 0.96898200  | 0.73656200  |
| C | 5.69340300  | -1.43662300 | -0.31899700 | C                                                         | 1.36683100  | 0.38365200  | 0.58899100  |
| H | 6.69519900  | -1.83891200 | -0.31994300 | C                                                         | 0.19632300  | 1.08948000  | 0.76697100  |
| C | 6.53937400  | 0.79989300  | 0.39551100  | C                                                         | 3.47198900  | -1.23767500 | 0.30084300  |
| H | 6.52087400  | 1.63813200  | -0.29907700 | I                                                         | 1.38942900  | -1.64493700 | 0.06142500  |
| H | 6.39731500  | 1.11482200  | 1.42740500  | C                                                         | 4.68048800  | -1.89955200 | 0.20396400  |

|                                                           |             |             |             |                                                           |             |             |             |
|-----------------------------------------------------------|-------------|-------------|-------------|-----------------------------------------------------------|-------------|-------------|-------------|
| H                                                         | -0.62572000 | 3.01637500  | 1.21355700  | H                                                         | 4.44929200  | -2.88656200 | 1.36263900  |
| H                                                         | 1.59816200  | 4.10706200  | 1.41794700  | H                                                         | 0.93683300  | -2.00244300 | -1.51865800 |
| H                                                         | 4.84672900  | -2.94279800 | -0.00504400 | N                                                         | 5.46339000  | -1.63257900 | 0.02430900  |
| H                                                         | 3.64940000  | 2.83473000  | 1.14346300  | C                                                         | 0.00845700  | 2.34386600  | -1.04693200 |
| H                                                         | -0.75581800 | 0.58950500  | 0.66687300  | C                                                         | -1.15950800 | 3.08859800  | -0.95812900 |
| N                                                         | 5.04917200  | 0.25278300  | 0.65642200  | C                                                         | -2.39068900 | 2.47577200  | -0.74836400 |
| C                                                         | 5.71757900  | 1.51947000  | 0.95101700  | C                                                         | -2.44415100 | 1.09098000  | -0.63230600 |
| H                                                         | 6.78271400  | 1.30170800  | 0.93233500  | C                                                         | -1.25890500 | 0.35173700  | -0.72409300 |
| H                                                         | 5.47878100  | 2.25011800  | 0.18089000  | C                                                         | -0.03363600 | 0.95687600  | -0.92381500 |
| H                                                         | 5.43038600  | 1.86510000  | 1.94235200  | C                                                         | -3.52021900 | -1.03961800 | -0.38771000 |
| C                                                         | 5.64316000  | -0.92393700 | 0.43637500  | I                                                         | -1.45601100 | -1.73119800 | -0.55302000 |
| H                                                         | 6.72050800  | -0.98715600 | 0.46335800  | C                                                         | -4.79453500 | -1.54905000 | -0.19506200 |
| N                                                         | 3.71119000  | 0.06327300  | 0.57073000  | H                                                         | 0.95908500  | 2.83715200  | -1.21046000 |
| <b>Cat6-INT3</b>                                          |             |             |             | H                                                         | -1.12576600 | 4.16685000  | -1.05304100 |
| Sum of electronic and thermal Free Energies=              |             |             |             | H                                                         | -5.08274100 | -2.58349500 | -0.11292300 |
| -1502.04872 Hartree                                       |             |             |             | H                                                         | -3.27476700 | 3.08839200  | -0.68862100 |
| Sum of electronic and thermal free energies + the entropy |             |             |             | H                                                         | 0.86545800  | 0.35566700  | -0.96926400 |
| correction at 298.15K=                                    |             |             |             | N                                                         | -4.90637300 | 0.67495500  | -0.26959700 |
| -1502.03862 Hartree                                       |             |             |             | C                                                         | -5.41354000 | 2.04478700  | -0.22432800 |
| C                                                         | 2.44554000  | -1.00267900 | 1.70425800  | H                                                         | -6.48072500 | 1.95665600  | -0.03678300 |
| O                                                         | 0.61612200  | -1.88221900 | -0.61539600 | H                                                         | -4.94183700 | 2.58575400  | 0.59400000  |
| H                                                         | 2.30426500  | -1.99807000 | 2.12127100  | H                                                         | -5.25071200 | 2.53534900  | -1.18205100 |
| C                                                         | 1.42324000  | -0.04336700 | 2.05654700  | C                                                         | -5.62931800 | -0.44100900 | -0.12665500 |
| C                                                         | 0.15227900  | -0.54269700 | 2.38516700  | H                                                         | -6.69635200 | -0.36251500 | 0.01875400  |
| C                                                         | 1.65712300  | 1.33896200  | 2.12066100  | N                                                         | -3.61100500 | 0.30494500  | -0.42889200 |
| C                                                         | -0.89014200 | 0.32763300  | 2.66881700  | <b>TS4</b>                                                |             |             |             |
| H                                                         | -0.00736700 | -1.61581200 | 2.39344700  | Sum of electronic and thermal Free Energies=              |             |             |             |
| C                                                         | 0.62061200  | 2.20380000  | 2.43856400  | -996.77109 Hartree                                        |             |             |             |
| H                                                         | 2.65698300  | 1.72492500  | 1.96649500  | Sum of electronic and thermal free energies + the entropy |             |             |             |
| C                                                         | -0.65853000 | 1.70276100  | 2.68385300  | correction at 298.15K=                                    |             |             |             |
| H                                                         | -1.87834000 | -0.06206500 | 2.88736700  | -996.76079 Hartree                                        |             |             |             |
| H                                                         | 0.80610900  | 3.26997800  | 2.49481800  | C                                                         | 3.19392500  | 0.52153400  | -0.58954800 |
| H                                                         | -1.46987500 | 2.38449500  | 2.91345300  | C                                                         | 6.41516200  | -0.67619600 | -0.88382900 |
| C                                                         | 5.26061200  | -0.35910900 | -0.53939700 | C                                                         | 5.54929000  | -0.63785000 | 0.21616500  |
| C                                                         | 4.07236200  | 0.16689900  | -0.00507500 | C                                                         | 6.04308500  | -0.22900900 | 1.45407800  |
| C                                                         | 3.62673200  | 1.39868700  | -0.48761100 | C                                                         | 7.38347900  | 0.12920500  | 1.54301200  |
| C                                                         | 4.38784700  | 2.05894700  | -1.44673300 | C                                                         | 8.22475100  | 0.09693500  | 0.42053800  |
| C                                                         | 5.58228600  | 1.51818900  | -1.93434700 | C                                                         | 7.75266500  | -0.30787900 | -0.82176100 |
| C                                                         | 6.03842300  | 0.28354100  | -1.48802300 | H                                                         | 9.26288000  | 0.38928600  | 0.52457200  |
| C                                                         | 4.48693700  | -1.94189300 | 0.83729000  | H                                                         | 8.39084200  | -0.34035500 | -1.69654200 |
| C                                                         | 3.55330400  | -0.85535800 | 0.91662200  | H                                                         | 5.39618300  | -0.18938200 | 2.32361200  |
| H                                                         | 2.70748300  | 1.84415300  | -0.13628100 | H                                                         | 7.78876400  | 0.44442900  | 2.49744000  |
| H                                                         | 4.04565300  | 3.01600800  | -1.82256500 | C                                                         | 4.42713900  | -1.39274900 | -1.62621000 |
| H                                                         | 6.15424700  | 2.06206800  | -2.67632800 | N                                                         | 5.67092100  | -1.14481100 | -1.97955500 |
| H                                                         | 6.94842700  | -0.16631700 | -1.86591600 | H                                                         | 3.70357600  | -1.74488600 | -2.34800200 |
| H                                                         | 6.25670100  | -2.23371700 | -0.18605800 | H                                                         | 6.03279900  | -1.24346200 | -2.92384800 |

|   |             |             |             |                                                           |             |             |             |
|---|-------------|-------------|-------------|-----------------------------------------------------------|-------------|-------------|-------------|
| C | 4.20905200  | -0.99869800 | -0.26817700 | C                                                         | -5.72250600 | 5.09748700  | -0.53087700 |
| H | 3.49527300  | -1.52778500 | 0.35208200  | H                                                         | -6.44491700 | 5.88005100  | -0.72787700 |
| O | 2.04299200  | 0.14007500  | -1.07404600 | C                                                         | -6.08068200 | 4.03516300  | 0.32005700  |
| H | 3.87231100  | 1.04862300  | -1.27849400 | H                                                         | -7.07137000 | 4.02315000  | 0.75778900  |
| C | 3.19236200  | 1.19037100  | 0.76401400  | C                                                         | -5.20182100 | 3.00452800  | 0.61241300  |
| C | 4.04037800  | 2.26861300  | 1.00944800  | C                                                         | -4.62744800 | -3.66871400 | 1.06978500  |
| C | 2.32669500  | 0.75383800  | 1.76888300  | C                                                         | -5.31893900 | -4.86097300 | 0.93052400  |
| C | 4.02453500  | 2.90860300  | 2.24767300  | H                                                         | -6.30769700 | -4.95068300 | 1.36353700  |
| H | 4.71442100  | 2.60786500  | 0.22844300  | C                                                         | -4.77302600 | -5.95935400 | 0.23972300  |
| C | 2.31423500  | 1.38560400  | 3.00677600  | H                                                         | -5.35405900 | -6.86961600 | 0.15645900  |
| H | 1.66124200  | -0.08197800 | 1.57647100  | C                                                         | -3.51464900 | -5.90741800 | -0.33706700 |
| C | 3.16447200  | 2.46583500  | 3.24816300  | H                                                         | -4.19120500 | 5.98238500  | -1.77988100 |
| H | 4.68421400  | 3.74937300  | 2.42992500  | H                                                         | -5.46956400 | 2.18360300  | 1.26602500  |
| H | 1.64198900  | 1.03968200  | 3.78405200  | H                                                         | -5.03991600 | -2.81854400 | 1.59895900  |
| H | 3.15276700  | 2.96021800  | 4.21287200  | H                                                         | -3.09204800 | -6.74842400 | -0.87222200 |
| C | -2.68767900 | -0.18871000 | 0.24075200  | H                                                         | -2.74090900 | -0.26958800 | -0.83937100 |
| C | -2.61088500 | 0.01784200  | 3.03263000  | <b>INT4</b>                                               |             |             |             |
| C | -2.74893500 | 1.04713700  | 0.87192500  | Sum of electronic and thermal Free Energies =             |             |             |             |
| C | -2.54056900 | -1.31439000 | 1.04073100  | -996.797456 Hartree                                       |             |             |             |
| C | -2.50709200 | -1.22953100 | 2.42740300  | Sum of electronic and thermal free energies + the entropy |             |             |             |
| C | -2.71885500 | 1.16604500  | 2.25589100  | correction at 298.15K =                                   |             |             |             |
| H | -2.39167200 | -2.13118700 | 3.01779400  | -996.78726 Hartree                                        |             |             |             |
| H | -2.76824900 | 2.14835000  | 2.71116100  | C                                                         | -2.67661100 | -2.12193000 | 0.02926800  |
| C | -1.85250500 | 2.76042800  | -0.68670400 | C                                                         | -2.21756800 | -0.85937800 | -0.33968200 |
| N | -2.28322900 | 3.89290400  | -1.24257800 | C                                                         | -3.14375100 | 0.11984800  | -0.67070300 |
| C | -1.33856500 | -3.05996700 | -0.25634900 | C                                                         | -4.49938300 | -0.20663600 | -0.60168000 |
| N | -1.55779900 | -4.31851200 | -0.63590300 | C                                                         | -4.92678600 | -1.47970100 | -0.21760700 |
| I | -0.00172800 | 1.83114800  | -0.90404800 | C                                                         | -4.00996700 | -2.47727000 | 0.10553500  |
| I | 0.32560200  | -1.87786700 | -0.63410600 | C                                                         | -0.43568200 | -2.28519400 | 0.09896300  |
| C | -1.55574100 | 4.77824200  | -2.14810500 | C                                                         | -0.71016400 | -0.87515100 | -0.29436900 |
| H | -1.52126200 | 5.77448800  | -1.70880900 | H                                                         | -2.82994100 | 1.10951900  | -0.98056500 |
| H | -2.07575600 | 4.80644200  | -3.10509800 | H                                                         | -5.23745000 | 0.54498000  | -0.85528700 |
| H | -0.54578000 | 4.40163600  | -2.28612900 | H                                                         | -5.98677600 | -1.69887800 | -0.17587800 |
| C | -0.67291900 | -5.17475800 | -1.42288500 | H                                                         | -4.31769600 | -3.47437800 | 0.39530900  |
| H | -1.04179600 | -5.22751200 | -2.44703100 | H                                                         | -1.58209400 | -3.91065600 | 0.56684500  |
| H | -0.66823800 | -6.16594600 | -0.97255200 | H                                                         | 0.53069500  | -2.75126400 | 0.24880000  |
| H | 0.33361500  | -4.76481300 | -1.40603800 | H                                                         | -0.27768700 | -0.70145400 | -1.28675700 |
| H | -2.58408200 | 0.09755400  | 4.11188900  | N                                                         | -1.53437300 | -2.93166200 | 0.28141900  |
| C | -3.94575500 | 3.08212100  | 0.01759200  | C                                                         | -0.06920200 | 0.11980000  | 0.72448200  |
| C | -3.59009900 | 4.13229300  | -0.82654200 | H                                                         | -0.53955500 | -0.08251400 | 1.69116900  |
| C | -3.36318400 | -3.62158000 | 0.48886700  | C                                                         | -0.42585200 | 1.54763200  | 0.34560800  |
| C | -2.81910600 | -4.70888200 | -0.19287100 | C                                                         | -1.21941300 | 2.30814800  | 1.20396300  |
| N | -2.83627200 | 2.24004100  | 0.07797900  | C                                                         | 0.00524700  | 2.11267400  | -0.85677400 |
| N | -2.41115700 | -2.60548900 | 0.42483700  | C                                                         | -1.58070500 | 3.61165200  | 0.86860500  |
| C | -4.47174200 | 5.16876900  | -1.12280300 | H                                                         | -1.56455800 | 1.87412800  | 2.13702600  |
|   |             |             |             | C                                                         | -0.35583800 | 3.41290500  | -1.19479900 |

|                                                           |             |             |             |   |             |             |             |
|-----------------------------------------------------------|-------------|-------------|-------------|---|-------------|-------------|-------------|
| H                                                         | 0.62211300  | 1.53497200  | -1.53707500 | C | 0.55834000  | 0.05518600  | 2.77908200  |
| C                                                         | -1.15244100 | 4.16596200  | -0.33350000 | C | 0.73444300  | -2.68585200 | 2.37494300  |
| H                                                         | -2.20048100 | 4.18954300  | 1.54491200  | H | 2.36455800  | -2.24586600 | 1.07372600  |
| H                                                         | -0.01633500 | 3.83853200  | -2.13234000 | C | -0.34730500 | -0.80335700 | 3.40217300  |
| H                                                         | -1.43527400 | 5.17816000  | -0.59903700 | H | 0.47819400  | 1.12060600  | 2.95762200  |
| C                                                         | 3.66843200  | -0.45351200 | 0.65553800  | C | -0.26479400 | -2.17811500 | 3.20518500  |
| C                                                         | 2.45668600  | -0.33646900 | -0.07556000 | H | 0.81569600  | -3.75442300 | 2.20891600  |
| C                                                         | 2.51404200  | -0.47948000 | -1.47676200 | H | -1.11641400 | -0.39073600 | 4.04559100  |
| C                                                         | 3.73349200  | -0.71907100 | -2.08489700 | H | -0.96313600 | -2.84747800 | 3.69459600  |
| C                                                         | 4.92073200  | -0.82188400 | -1.33223400 | C | 1.06821300  | 3.94751800  | 1.26351100  |
| C                                                         | 4.90356000  | -0.69212200 | 0.04401600  | C | 1.04229400  | 2.60480300  | 0.81854700  |
| C                                                         | 2.02394700  | -0.10146000 | 2.12543800  | C | -0.00903700 | 2.18239600  | -0.00917500 |
| C                                                         | 1.41213500  | -0.10613800 | 0.89837800  | C | -1.00177000 | 3.08024400  | -0.35793800 |
| H                                                         | 1.62327000  | -0.40647000 | -2.08907400 | C | -0.96009500 | 4.41251300  | 0.10510500  |
| H                                                         | 3.77822700  | -0.82900900 | -3.16227900 | C | 0.07143400  | 4.86453400  | 0.91128500  |
| H                                                         | 5.85995800  | -1.00704000 | -1.84060400 | C | 2.85445400  | 2.89790900  | 2.11271100  |
| H                                                         | 5.80882700  | -0.77179600 | 0.63514000  | C | 2.19655600  | 1.94884400  | 1.37593300  |
| H                                                         | 4.03675000  | -0.34306000 | 2.74384200  | H | -0.01553800 | 1.16771100  | -0.38983700 |
| H                                                         | 1.58465800  | 0.03417300  | 3.10307800  | H | -1.81648200 | 2.76023400  | -1.00031200 |
| N                                                         | 3.37064400  | -0.30074400 | 1.98506900  | H | -1.74880700 | 5.09839600  | -0.18179900 |
| <b>Cat6-TS5</b>                                           |             |             |             | H | 0.10761400  | 5.88995200  | 1.26103700  |
| Sum of electronic and thermal Free Energies=              |             |             |             | H | 2.47521500  | 4.94839100  | 2.50503000  |
| -1865.716088 Hartree                                      |             |             |             | H | 3.75755400  | 2.80469800  | 2.69809700  |
| Sum of electronic and thermal free energies + the entropy |             |             |             | N | 2.18667700  | 4.09591600  | 2.04553200  |
| correction at 298.15K=                                    |             |             |             | O | 0.74839100  | -1.18563000 | -1.20306400 |
| -1865.70615 Hartree                                       |             |             |             | H | 0.99058700  | -1.91831400 | -1.78665900 |
| C                                                         | 4.47620300  | -0.48009500 | -1.81936600 | C | -2.03642100 | 1.13814600  | -3.50607500 |
| C                                                         | 4.06063000  | -0.80306900 | -0.52130400 | C | -3.37820000 | 1.42732200  | -3.29363000 |
| C                                                         | 4.74639800  | -1.80308700 | 0.16951500  | C | -4.07658200 | 0.87526100  | -2.22507500 |
| C                                                         | 5.78468000  | -2.46356700 | -0.47726600 | C | -3.41109700 | 0.01631200  | -1.35628400 |
| C                                                         | 6.14582700  | -2.14918600 | -1.79504100 | C | -2.05639300 | -0.25944200 | -1.57872000 |
| C                                                         | 5.49646200  | -1.13962200 | -2.49173700 | C | -1.35825900 | 0.28626300  | -2.63895700 |
| C                                                         | 2.88193000  | 0.99869200  | -1.29506700 | C | -3.17898600 | -1.43450700 | 0.54341200  |
| C                                                         | 2.91571700  | 0.08197900  | -0.18707000 | I | -1.17002700 | -1.50835500 | -0.14328800 |
| H                                                         | 4.49459400  | -2.05210000 | 1.19372300  | C | -3.94037600 | -1.94608300 | 1.57607600  |
| H                                                         | 6.33076100  | -3.23670700 | 0.05034200  | H | -1.50634700 | 1.57650200  | -4.34235700 |
| H                                                         | 6.95489300  | -2.69023700 | -2.27073700 | H | -3.90280500 | 2.09471300  | -3.96600100 |
| H                                                         | 5.77550000  | -0.86509000 | -3.50181500 | H | -3.62534000 | -2.61113400 | 2.36226800  |
| H                                                         | 3.77328800  | 1.04842100  | -3.15798200 | H | -5.11782700 | 1.12177800  | -2.09673000 |
| H                                                         | 2.21782800  | 1.83819400  | -1.45217100 | H | -0.30971500 | 0.05881000  | -2.77487300 |
| H                                                         | 1.91140800  | -0.54226000 | -0.66156200 | N | -5.21220400 | -0.63678700 | 0.29433600  |
| N                                                         | 3.71239600  | 0.61764000  | -2.23919100 | C | -6.36290800 | 0.08484300  | -0.24743200 |
| C                                                         | 2.57672700  | 0.49684600  | 1.26379800  | H | -7.20021800 | -0.16946300 | 0.39780700  |
| H                                                         | 3.51041300  | 0.37553800  | 1.82489500  | H | -6.17904200 | 1.15680200  | -0.20571000 |
| C                                                         | 1.55382500  | -0.43737900 | 1.93083600  | H | -6.56583000 | -0.25340600 | -1.26182100 |
| C                                                         | 1.62370500  | -1.82292600 | 1.74057000  |   |             |             |             |

|                                                                                                            |             |             |             |                                                                                                            |            |             |             |
|------------------------------------------------------------------------------------------------------------|-------------|-------------|-------------|------------------------------------------------------------------------------------------------------------|------------|-------------|-------------|
| C                                                                                                          | -5.21128000 | -1.41900800 | 1.37764200  | H                                                                                                          | 1.82360100 | -5.17027500 | 0.32811400  |
| H                                                                                                          | -6.12522900 | -1.55130200 | 1.93664500  | H                                                                                                          | 4.09334500 | -6.14502400 | 0.16664200  |
| N                                                                                                          | -3.95930900 | -0.64109400 | -0.22100100 | H                                                                                                          | 6.07497600 | -4.68414400 | -0.06428300 |
| <b>Cat7-TS1</b>                                                                                            |             |             |             | H                                                                                                          | 5.82947900 | -2.22938400 | -0.14177700 |
| Sum of electronic and thermal Free Energies=<br>-2316.32252 Hartree                                        |             |             |             | C                                                                                                          | 2.04673500 | -0.48643400 | 0.11632700  |
| Sum of electronic and thermal free energies + the entropy<br>correction at 298.15K=<br>-2316.31265 Hartree |             |             |             | C                                                                                                          | 1.80247600 | 3.61270400  | -0.23812000 |
| C                                                                                                          | -2.07986200 | -0.10260200 | -0.05512600 | C                                                                                                          | 3.07132900 | 3.02028800  | -0.28120400 |
| C                                                                                                          | -4.97971900 | 1.72220100  | 0.44703900  | C                                                                                                          | 4.18277800 | 3.84742800  | -0.45888400 |
| C                                                                                                          | -4.69383500 | 0.38140500  | 0.75003600  | C                                                                                                          | 3.99730800 | 5.21675900  | -0.58709400 |
| C                                                                                                          | -5.58696700 | -0.61207400 | 0.34070800  | C                                                                                                          | 2.71985500 | 5.77691700  | -0.54254800 |
| C                                                                                                          | -6.72821800 | -0.22847000 | -0.35008800 | C                                                                                                          | 1.59579100 | 4.97428700  | -0.36436600 |
| C                                                                                                          | -6.98506500 | 1.12028900  | -0.64915000 | C                                                                                                          | 1.88671800 | 0.90989400  | 0.03072300  |
| C                                                                                                          | -6.11103200 | 2.12322000  | -0.25647700 | C                                                                                                          | 3.07005800 | 1.57609700  | -0.14176000 |
| H                                                                                                          | -7.88397900 | 1.38211200  | -1.19459000 | H                                                                                                          | 5.18010100 | 3.42320000  | -0.49534300 |
| H                                                                                                          | -6.29677600 | 3.16689900  | -0.47973400 | H                                                                                                          | 4.85869600 | 5.85855500  | -0.72511400 |
| H                                                                                                          | -5.39170900 | -1.65670600 | 0.55752200  | H                                                                                                          | 2.59344200 | 6.84755300  | -0.64728400 |
| H                                                                                                          | -7.43717800 | -0.98355600 | -0.66911700 | H                                                                                                          | 0.60374000 | 5.40780300  | -0.33089200 |
| C                                                                                                          | -3.05427400 | 1.72137000  | 1.58520000  | S                                                                                                          | 4.40651900 | 0.47644900  | -0.19181500 |
| N                                                                                                          | -3.94595000 | 2.49715400  | 0.98039700  | I                                                                                                          | 0.28663100 | 2.18672100  | 0.05587200  |
| H                                                                                                          | -2.20339600 | 2.14842700  | 2.09775100  | I                                                                                                          | 0.77645700 | -2.08315600 | 0.30323700  |
| H                                                                                                          | -3.87914600 | 3.50753700  | 0.90679200  | <b>Cat7-INT1</b>                                                                                           |            |             |             |
| C                                                                                                          | -3.38713100 | 0.35978600  | 1.40463100  | Sum of electronic and thermal Free Energies=<br>-2316.33353 Hartree                                        |            |             |             |
| H                                                                                                          | -3.04648600 | -0.40324000 | 2.08995800  | Sum of electronic and thermal free energies + the entropy<br>correction at 298.15K=<br>-2316.32368 Hartree |            |             |             |
| O                                                                                                          | -0.87559400 | -0.03875100 | 0.42104400  | C                                                                                                          | 2.17552300 | 0.00795200  | 0.21557100  |
| H                                                                                                          | -2.39739400 | 0.69040100  | -0.74680100 | C                                                                                                          | 5.02272600 | 1.18848900  | -1.47558800 |
| C                                                                                                          | -2.61425300 | -1.44765000 | -0.43168700 | C                                                                                                          | 4.59177100 | 0.09485200  | -0.72524500 |
| C                                                                                                          | -3.18292900 | -1.60831100 | -1.69338000 | C                                                                                                          | 5.50055000 | -0.54051900 | 0.10911900  |
| C                                                                                                          | -2.52737600 | -2.53960000 | 0.43706600  | C                                                                                                          | 6.80812700 | -0.05309900 | 0.15321600  |
| C                                                                                                          | -3.64070400 | -2.86105900 | -2.09710000 | C                                                                                                          | 7.20716000 | 1.04366700  | -0.61328600 |
| H                                                                                                          | -3.26413700 | -0.75448300 | -2.35831900 | C                                                                                                          | 6.30831700 | 1.69461500  | -1.45477700 |
| C                                                                                                          | -2.98827800 | -3.78661300 | 0.03464300  | H                                                                                                          | 8.23003000 | 1.39504300  | -0.55415100 |
| H                                                                                                          | -2.13081800 | -2.40786500 | 1.44011500  | H                                                                                                          | 6.59377500 | 2.54741500  | -2.05818400 |
| C                                                                                                          | -3.54288000 | -3.94863400 | -1.23586200 | H                                                                                                          | 5.21370300 | -1.39324400 | 0.71134100  |
| H                                                                                                          | -4.07751100 | -2.98314500 | -3.08136400 | H                                                                                                          | 7.53064600 | -0.53841800 | 0.79852400  |
| H                                                                                                          | -2.92670100 | -4.62948700 | 0.71305500  | C                                                                                                          | 2.85036100 | 0.95681600  | -1.99896200 |
| H                                                                                                          | -3.90477900 | -4.92156900 | -1.54755900 | N                                                                                                          | 3.90973500 | 1.65342000  | -2.22697800 |
| C                                                                                                          | 3.68280300  | -2.29410300 | 0.04868000  | H                                                                                                          | 1.91111100 | 1.17079000  | -2.49336100 |
| C                                                                                                          | 2.58195000  | -3.15101400 | 0.18106700  | H                                                                                                          | 3.94935500 | 2.44344300  | -2.87231800 |
| C                                                                                                          | 2.69071700  | -4.52889200 | 0.22691200  | C                                                                                                          | 3.12758700 | -0.12062700 | -1.01303600 |
| C                                                                                                          | 3.97101500  | -5.06934800 | 0.13513500  | H                                                                                                          | 2.92688900 | -1.07410900 | -1.52083900 |
| C                                                                                                          | 5.08815000  | -4.24332000 | 0.00448900  | O                                                                                                          | 0.84640400 | 0.08321700  | -0.21575500 |
| C                                                                                                          | 4.95529000  | -2.86283800 | -0.03980000 | H                                                                                                          | 2.46151500 | 0.94009500  | 0.73066900  |
| C                                                                                                          | 3.35306500  | -0.88264800 | 0.01121300  | C                                                                                                          | 2.33644400 | -1.13034600 | 1.21165800  |



|                                                           |             |             |             |   |             |             |             |
|-----------------------------------------------------------|-------------|-------------|-------------|---|-------------|-------------|-------------|
| C                                                         | 1.93628000  | -0.89059400 | 2.52858500  | C | 1.75116700  | -1.92369100 | 1.59585800  |
| C                                                         | 2.71936800  | -2.42048700 | 0.84364500  | C | 0.92490700  | -1.13377600 | 2.39225800  |
| C                                                         | 1.90744400  | -1.92292300 | 3.45963900  | C | 2.87339200  | -2.53160400 | 2.16421600  |
| H                                                         | 1.63832300  | 0.11236500  | 2.82032500  | C | 1.22486100  | -0.93914600 | 3.74003000  |
| C                                                         | 2.69157300  | -3.45668900 | 1.77621300  | H | 0.03887900  | -0.66668600 | 1.97594200  |
| H                                                         | 3.04067300  | -2.63829200 | -0.16981100 | C | 3.17036200  | -2.34027600 | 3.50785200  |
| C                                                         | 2.28247500  | -3.21135800 | 3.08302200  | H | 3.52056900  | -3.14759000 | 1.54718500  |
| H                                                         | 1.59445400  | -1.72299500 | 4.47800900  | C | 2.34836500  | -1.53783100 | 4.29865500  |
| H                                                         | 2.99035400  | -4.45487500 | 1.47734700  | H | 0.57719600  | -0.31907400 | 4.34897800  |
| H                                                         | 2.26031800  | -4.01813400 | 3.80656700  | H | 4.04674500  | -2.81138200 | 3.93780700  |
| C                                                         | -3.44487500 | -2.33434900 | -0.55386200 | H | 2.58381300  | -1.38292900 | 5.34519600  |
| C                                                         | -2.28645000 | -3.12630200 | -0.58238800 | C | 4.59973800  | -1.39284100 | -1.79234900 |
| C                                                         | -2.32407500 | -4.50077600 | -0.74069600 | C | 3.75751200  | -1.09286400 | -0.70982500 |
| C                                                         | -3.57273900 | -5.10321800 | -0.87400600 | C | 4.12458800  | -0.07333100 | 0.17504100  |
| C                                                         | -4.73961200 | -4.33802300 | -0.84790500 | C | 5.29810100  | 0.62530500  | -0.07705700 |
| C                                                         | -4.68643200 | -2.96016900 | -0.68883900 | C | 6.10722500  | 0.32398700  | -1.18361100 |
| C                                                         | -3.19445400 | -0.91476900 | -0.37763000 | C | 5.77302000  | -0.69686600 | -2.06096000 |
| H                                                         | -1.41839000 | -5.09548200 | -0.76072400 | C | 2.90667400  | -2.85399500 | -1.91356200 |
| H                                                         | -3.63248400 | -6.17752900 | -0.99946200 | C | 2.60487400  | -1.99579000 | -0.82531100 |
| H                                                         | -5.70157500 | -4.82450500 | -0.95363200 | H | 3.53706700  | 0.15001700  | 1.05895800  |
| H                                                         | -5.59865400 | -2.37373100 | -0.67016000 | H | 5.60240900  | 1.41262800  | 0.60229800  |
| C                                                         | -1.90462700 | -0.47362900 | -0.28059900 | H | 7.01549600  | 0.89091300  | -1.34862700 |
| C                                                         | -1.79512400 | 3.56112100  | 0.41748500  | H | 6.39342000  | -0.94859200 | -2.91255600 |
| C                                                         | -3.05607200 | 2.96932300  | 0.24710800  | H | 4.42008100  | -2.87463200 | -3.33198300 |
| C                                                         | -4.19487800 | 3.77286800  | 0.33886900  | H | 2.32060400  | -3.67396400 | -2.30605100 |
| C                                                         | -4.04988600 | 5.12946900  | 0.59479800  | H | 1.60132200  | -1.32734400 | -1.35250300 |
| C                                                         | -2.78557300 | 5.69674100  | 0.76066500  | N | 4.03518700  | -2.46804200 | -2.48402100 |
| C                                                         | -1.63741800 | 4.91293500  | 0.67143000  | C | -4.37405200 | -0.50392200 | -0.16099200 |
| C                                                         | -1.80293800 | 0.91143800  | -0.07098200 | C | -3.90822800 | -1.81516500 | -0.32525700 |
| C                                                         | -3.01438200 | 1.53870800  | -0.00534300 | C | -4.75250500 | -2.90933500 | -0.39565900 |
| H                                                         | -5.18170400 | 3.34124300  | 0.21066100  | C | -6.12162800 | -2.67353400 | -0.29842000 |
| H                                                         | -4.93160600 | 5.75459200  | 0.66602100  | C | -6.61233300 | -1.37716800 | -0.13508500 |
| H                                                         | -2.69046800 | 6.75711400  | 0.96117300  | C | -5.75131100 | -0.29106200 | -0.06505400 |
| H                                                         | -0.65614500 | 5.35526000  | 0.79946500  | C | -3.32863900 | 0.50260000  | -0.10991500 |
| S                                                         | -4.31122400 | 0.40457100  | -0.21722200 | H | -4.37173600 | -3.91612500 | -0.52169400 |
| I                                                         | -0.21809400 | 2.16353600  | 0.21364800  | H | -6.80834400 | -3.50970600 | -0.35023100 |
| I                                                         | -0.52807500 | -1.97684900 | -0.36957800 | H | -7.68048100 | -1.21378300 | -0.06094200 |
| <b>Cat7-TS2</b>                                           |             |             |             | H | -6.14349200 | 0.71186200  | 0.06304300  |
| Sum of electronic and thermal Free Energies=              |             |             |             | C | -2.01751200 | 0.12244100  | -0.20774600 |
| -2316.29335 Hartree                                       |             |             |             | C | 0.41480300  | 3.45388800  | -0.05184400 |
| Sum of electronic and thermal free energies + the entropy |             |             |             | C | -0.97162900 | 3.64018900  | 0.03796300  |
| correction at 298.15K=                                    |             |             |             | C | -1.45096500 | 4.94618100  | 0.16512700  |
| -2316.28348 Hartree                                       |             |             |             | C | -0.55073700 | 6.00177600  | 0.20045000  |
| C                                                         | 1.44196300  | -2.16602600 | 0.13854700  | C | 0.82390000  | 5.77965700  | 0.10980200  |
| O                                                         | 0.53526100  | -1.19997000 | -0.44771600 | C | 1.33067400  | 4.48880000  | -0.01859700 |
| H                                                         | 1.02727700  | -3.17489400 | 0.01380900  |   |             |             |             |

|   |             |             |             |   |             |             |             |
|---|-------------|-------------|-------------|---|-------------|-------------|-------------|
| C | -1.12748500 | 1.21300000  | -0.15393200 | C | -2.39884900 | -3.14147000 | -0.41386500 |
| C | -1.75676700 | 2.42129600  | -0.01997800 | C | -2.42394300 | -4.51824300 | -0.53713600 |
| H | -2.51712700 | 5.13229300  | 0.23497300  | C | -3.67427400 | -5.13024100 | -0.57573500 |
| H | -0.92345000 | 7.01379700  | 0.29955800  | C | -4.84298500 | -4.37229000 | -0.49000300 |
| H | 1.51149400  | 6.61608800  | 0.13827900  | C | -4.79335900 | -2.99107500 | -0.36471300 |
| H | 2.39758200  | 4.31391800  | -0.08970800 | C | -3.30385000 | -0.92680000 | -0.19977300 |
| S | -3.47564000 | 2.22163900  | 0.04941200  | H | -1.51491300 | -5.10396200 | -0.60142000 |
| I | 0.90911600  | 1.42041300  | -0.21967000 | H | -3.73226700 | -6.20738800 | -0.67310900 |
| I | -1.80688000 | -1.90287300 | -0.44516700 | H | -5.80535500 | -4.86804500 | -0.52097200 |

### Cat7-TS2'

Sum of electronic and thermal Free Energies=  
-2392.72546 Hartree

Sum of electronic and thermal free energies + the entropy  
correction at 298.15K=-2392.71556 Hartree

|   |             |             |             |
|---|-------------|-------------|-------------|
| C | 2.08892200  | 0.20383100  | 0.43014100  |
| C | 5.47541800  | 1.42261700  | -0.68331500 |
| C | 4.72701800  | 0.39084900  | -0.08852300 |
| C | 5.41853200  | -0.61552000 | 0.60099900  |
| C | 6.80357500  | -0.56204800 | 0.64212600  |
| C | 7.52287200  | 0.46527600  | 0.00897700  |
| C | 6.86650200  | 1.47991400  | -0.66603400 |
| H | 8.60527400  | 0.46777300  | 0.05717500  |
| H | 7.39924800  | 2.28804700  | -1.15260700 |
| H | 4.89504800  | -1.41898500 | 1.10119000  |
| H | 7.34553600  | -1.33341600 | 1.17663100  |
| C | 3.33086800  | 1.92562300  | -1.03899500 |
| N | 4.57818400  | 2.32251400  | -1.25026300 |
| H | 2.50266600  | 2.49929000  | -1.43470700 |
| H | 4.83957700  | 3.13542600  | -1.79945400 |
| C | 3.31102500  | 0.66933500  | -0.38232800 |
| H | 2.97529400  | 0.10424800  | -1.61034600 |
| O | 0.89735000  | 0.27338300  | -0.35379700 |
| H | 1.99436700  | 0.88116600  | 1.28939700  |
| C | 2.21972200  | -1.20344100 | 0.97984500  |
| C | 1.75916400  | -1.46219800 | 2.27044300  |
| C | 2.61753000  | -2.27144200 | 0.16985200  |
| C | 1.66837400  | -2.77054900 | 2.74117700  |
| H | 1.44755600  | -0.63457900 | 2.90019500  |
| C | 2.52114000  | -3.57924500 | 0.63572900  |
| H | 2.99312100  | -2.09378000 | -0.83256000 |
| C | 2.03664400  | -3.83176300 | 1.91973800  |
| H | 1.30126200  | -2.95931300 | 3.74334700  |
| H | 2.82386600  | -4.40149400 | -0.00235900 |
| H | 1.95743500  | -4.85130100 | 2.27887900  |
| C | -3.55259300 | -2.35007500 | -0.32529700 |

|   |             |             |             |
|---|-------------|-------------|-------------|
| C | -2.01591400 | -0.46320000 | -0.19369800 |
| C | -1.97998900 | 3.60969500  | 0.33608500  |
| C | -3.22553000 | 2.97122800  | 0.27314800  |
| C | -4.38387500 | 3.73940300  | 0.41408600  |
| C | -4.26867500 | 5.10848800  | 0.61055300  |
| C | -3.01652100 | 5.72275100  | 0.66872700  |
| C | -1.85007300 | 4.97457700  | 0.52897500  |
| C | -1.92481600 | 0.93258000  | -0.04417900 |
| C | -3.14822200 | 1.53503600  | 0.07320500  |
| H | -5.36211300 | 3.27289200  | 0.37151100  |
| H | -5.16479500 | 5.70685100  | 0.72068000  |
| H | -2.94558600 | 6.79241400  | 0.82463400  |
| H | -0.87825700 | 5.45271300  | 0.57316000  |
| S | -4.43206100 | 0.37469700  | -0.01646400 |
| I | -0.37351100 | 2.26609600  | 0.06451200  |
| I | -0.65025100 | -1.98245400 | -0.31906900 |
| O | 2.14134400  | -0.43102800 | -2.43230400 |
| H | 2.09115200  | 0.04058500  | -3.28023200 |
| H | 1.37251400  | -0.15087700 | -1.83658800 |

### Cat7-INT2

Sum of electronic and thermal Free Energies=  
-2316.35367 Hartree

Sum of electronic and thermal free energies + the entropy  
correction at 298.15K=-2316.34379 Hartree

|   |             |             |             |
|---|-------------|-------------|-------------|
| C | 1.49042600  | -2.49615000 | -0.48253800 |
| O | 0.43516700  | -1.56822300 | -0.90618500 |
| H | 1.23440200  | -3.47131600 | -0.90728600 |
| C | 1.48835600  | -2.59378700 | 1.02688700  |
| C | 0.63044100  | -1.86569000 | 1.84648500  |
| C | 2.42756700  | -3.44597900 | 1.61563900  |
| C | 0.72016000  | -1.96999000 | 3.23539200  |
| H | -0.11536700 | -1.19845900 | 1.43249000  |
| C | 2.51429100  | -3.55458700 | 2.99648200  |
| H | 3.09962000  | -4.01648800 | 0.98236300  |
| C | 1.66285500  | -2.80980100 | 3.81326600  |

|   |             |             |             |                                                           |             |                     |             |
|---|-------------|-------------|-------------|-----------------------------------------------------------|-------------|---------------------|-------------|
| H | 0.04956600  | -1.38914600 | 3.85792400  | I                                                         | -2.31695000 | -1.68075100         | -0.60096900 |
| H | 3.24992400  | -4.21688000 | 3.43808400  | <b>Cat7-TS3</b>                                           |             |                     |             |
| H | 1.73515600  | -2.88857900 | 4.89169200  | Sum of electronic and thermal Free Energies=              |             |                     |             |
| C | 4.73706500  | -0.91337700 | -1.51941700 | -2316.32733 Hartree                                       |             |                     |             |
| C | 3.75985400  | -1.10444100 | -0.51060500 | Sum of electronic and thermal free energies + the entropy |             |                     |             |
| C | 3.90911100  | -0.40616100 | 0.70640600  | correction at 298.15K=                                    |             | -2316.31744 Hartree |             |
| C | 4.97543600  | 0.46543500  | 0.85381000  | C                                                         | 1.99371900  | -1.52860000         | 1.24677700  |
| C | 5.92051800  | 0.64882100  | -0.17516000 | O                                                         | 0.80277300  | -1.04755300         | -0.41331300 |
| C | 5.82015200  | -0.04317700 | -1.36821300 | H                                                         | 1.32206100  | -2.33813200         | 1.52143600  |
| C | 3.24578000  | -2.38009200 | -2.30534600 | C                                                         | 1.75092100  | -0.28143000         | 1.97262100  |
| C | 2.80053100  | -2.04278600 | -1.04841600 | C                                                         | 0.44625100  | -0.02803400         | 2.42261500  |
| H | 3.21683800  | -0.55542400 | 1.52835300  | C                                                         | 2.75757300  | 0.65312400          | 2.23662200  |
| H | 5.09471400  | 1.00564600  | 1.78581900  | C                                                         | 0.13163900  | 1.17621200          | 3.03335100  |
| H | 6.74451900  | 1.33623000  | -0.02407500 | H                                                         | -0.32486000 | -0.77789100         | 2.27562800  |
| H | 6.54760000  | 0.08118400  | -2.16206800 | C                                                         | 2.44395400  | 1.85559500          | 2.86130300  |
| H | 4.92419500  | -1.79408400 | -3.44552900 | H                                                         | 3.78566300  | 0.43613300          | 1.97843800  |
| H | 2.80999700  | -3.06088400 | -3.02260200 | C                                                         | 1.13044800  | 2.13004500          | 3.23465700  |
| H | 0.50201700  | -1.53071800 | -1.87583200 | H                                                         | -0.88452900 | 1.37135800          | 3.35583900  |
| N | 4.39600900  | -1.70840200 | -2.58707900 | H                                                         | 3.22713800  | 2.57781900          | 3.05833400  |
| C | -4.46711800 | 0.20603300  | -0.07204300 | H                                                         | 0.88813200  | 3.07543600          | 3.70637800  |
| C | -4.32783500 | -1.16081400 | -0.33730500 | C                                                         | 5.17465900  | -2.29790900         | -0.45068500 |
| C | -5.38191200 | -2.05096200 | -0.40684500 | C                                                         | 4.28827000  | -1.28127300         | -0.04100300 |
| C | -6.65573400 | -1.52819000 | -0.19784400 | C                                                         | 4.57224300  | 0.03570500          | -0.42784800 |
| C | -6.83779000 | -0.17063000 | 0.06775800  | C                                                         | 5.72472600  | 0.28988800          | -1.15584700 |
| C | -5.75847300 | 0.69864500  | 0.13289200  | C                                                         | 6.60669600  | -0.74173900         | -1.51501900 |
| C | -3.22831300 | 0.95769500  | -0.03415900 | C                                                         | 6.33989400  | -2.05746400         | -1.17174900 |
| H | -5.23877700 | -3.10479600 | -0.61218400 | C                                                         | 3.47406700  | -3.32971000         | 0.56389800  |
| H | -7.51019400 | -2.19216000 | -0.24278900 | C                                                         | 3.19013600  | -1.95718200         | 0.64396300  |
| H | -7.83772500 | 0.21345400  | 0.22699700  | H                                                         | 3.91655700  | 0.85571500          | -0.16276300 |
| H | -5.91569400 | 1.75105600  | 0.34113900  | H                                                         | 5.94991000  | 1.30753700          | -1.45208500 |
| C | -2.02624300 | 0.33259200  | -0.24923100 | H                                                         | 7.50247100  | -0.50676100         | -2.07738300 |
| C | 1.02451100  | 3.11491100  | 0.13189400  | H                                                         | 6.99646700  | -2.87012300         | -1.45866300 |
| C | -0.30127700 | 3.54076100  | 0.27329700  | H                                                         | 5.08219400  | -4.42041500         | -0.18915800 |
| C | -0.52329800 | 4.89012500  | 0.55936900  | H                                                         | 2.89249500  | -4.15682500         | 0.94634700  |
| C | 0.56140600  | 5.74557800  | 0.69041200  | H                                                         | 1.34462700  | -1.41657300         | -1.12816200 |
| C | 1.86917600  | 5.28115100  | 0.54333400  | N                                                         | 4.64304300  | -3.51803200         | -0.04263300 |
| C | 2.12348000  | 3.94200000  | 0.25768000  | C                                                         | -4.14216700 | -1.32382300         | -0.03357600 |
| C | -0.92468900 | 1.21702500  | -0.17470200 | C                                                         | -3.44410300 | -2.53165800         | -0.17564500 |
| C | -1.30154200 | 2.50448400  | 0.11049900  | C                                                         | -4.06789500 | -3.76635700         | -0.13672100 |
| H | -1.53446500 | 5.26443500  | 0.67724600  | C                                                         | -5.44853300 | -3.78692600         | 0.04637800  |
| H | 0.38762600  | 6.79139600  | 0.91144700  | C                                                         | -6.16659500 | -2.59895000         | 0.19053200  |
| H | 2.70271100  | 5.96423800  | 0.65080500  | C                                                         | -5.52564500 | -1.36847300         | 0.15263300  |
| H | 3.13647500  | 3.57533000  | 0.14300200  | C                                                         | -3.30939500 | -0.13681700         | -0.10880400 |
| S | -3.01607300 | 2.64568200  | 0.26929000  | H                                                         | -3.51122500 | -4.68953100         | -0.24596300 |
| I | 1.12901100  | 1.06863400  | -0.29342100 | H                                                         | -5.96468700 | -4.73872700         | 0.07727800  |

|   |             |             |             |   |             |             |             |
|---|-------------|-------------|-------------|---|-------------|-------------|-------------|
| H | -7.23945200 | -2.63547900 | 0.33459300  | H | -0.07861200 | -3.56674400 | 0.28627300  |
| H | -6.09153300 | -0.45035300 | 0.26706000  | H | -0.72004000 | -5.25555700 | -1.36232500 |
| C | -1.95992600 | -0.27334700 | -0.28304900 | H | -3.08673800 | -5.69214900 | -1.90323300 |
| C | -0.18944400 | 3.41522700  | -0.65583800 | H | -4.89679800 | -4.36577100 | -0.79901800 |
| C | -1.57028200 | 3.37470400  | -0.41238000 | H | -5.29979500 | -2.32060700 | 0.98843500  |
| C | -2.26330500 | 4.58364500  | -0.31567300 | H | -4.01057100 | -0.75251600 | 2.39218000  |
| C | -1.57095200 | 5.77787300  | -0.45930700 | H | -1.26740500 | -1.70715600 | -1.52084400 |
| C | -0.19585100 | 5.78753900  | -0.69799900 | N | -4.28488900 | -2.34646900 | 1.05972900  |
| C | 0.51796100  | 4.59577700  | -0.79760100 | C | -1.10611700 | 3.60727700  | 0.17661100  |
| C | -1.28899800 | 0.95712200  | -0.38741100 | C | -2.30626800 | 2.98581600  | -0.20604100 |
| C | -2.12168800 | 2.03755400  | -0.28982500 | C | -3.53283300 | 3.61794100  | -0.08384000 |
| H | -3.33133200 | 4.58768100  | -0.12735300 | C | -3.55629300 | 4.91131000  | 0.43349500  |
| H | -2.10790800 | 6.71541400  | -0.38344500 | C | -2.37391900 | 5.54612000  | 0.81662800  |
| H | 0.32826800  | 6.72914000  | -0.80726600 | C | -1.14913600 | 4.90449500  | 0.69312100  |
| H | 1.58598700  | 4.60217800  | -0.98095300 | C | 0.07577900  | 2.78354300  | -0.01672500 |
| S | -3.76533000 | 1.53544500  | -0.05830500 | H | -4.45384300 | 3.12934700  | -0.38096700 |
| I | 0.65544900  | 1.48951600  | -0.70612700 | H | -4.50415200 | 5.42572800  | 0.53670900  |
| I | -1.36705200 | -2.22725200 | -0.39777000 | H | -2.40997400 | 6.55257000  | 1.21555900  |

#### Cat7-INT3

Sum of electronic and thermal Free Energies=  
-2316.34601 Hartree

Sum of electronic and thermal free energies + the entropy  
correction at 298.15K=-2316.33602 Hartree

|   |             |             |             |
|---|-------------|-------------|-------------|
| C | -1.26076400 | -1.06292000 | 2.29039100  |
| O | -0.78250900 | -0.87644200 | -1.61103300 |
| H | -1.67577400 | -0.18227500 | 2.77912500  |
| C | 0.17595900  | -1.19021100 | 2.37978400  |
| C | 0.92549600  | -0.01014100 | 2.53513200  |
| C | 0.83551400  | -2.43042900 | 2.36955100  |
| C | 2.30981700  | -0.06591900 | 2.59564500  |
| H | 0.40745000  | 0.94303800  | 2.58986300  |
| C | 2.21899100  | -2.48067100 | 2.44936900  |
| H | 0.26011500  | -3.34752700 | 2.35246000  |
| C | 2.95750300  | -1.29961200 | 2.53971100  |
| H | 2.88656600  | 0.84671300  | 2.69498500  |
| H | 2.72476700  | -3.43878300 | 2.45145000  |
| H | 4.04007700  | -1.34198400 | 2.59116600  |
| C | -3.46234100 | -3.24884600 | 0.35780200  |
| C | -2.12776500 | -2.98757600 | 0.71218800  |
| C | -1.12680900 | -3.72370000 | 0.07310100  |
| C | -1.49443900 | -4.68465600 | -0.86425900 |
| C | -2.83575200 | -4.93162000 | -1.17404900 |
| C | -3.85167700 | -4.20602300 | -0.56344000 |
| C | -3.56840400 | -1.53453200 | 1.78897100  |
| C | -2.17346100 | -1.85911700 | 1.65682800  |

|   |             |             |             |
|---|-------------|-------------|-------------|
| H | -0.07861200 | -3.56674400 | 0.28627300  |
| H | -0.72004000 | -5.25555700 | -1.36232500 |
| H | -3.08673800 | -5.69214900 | -1.90323300 |
| H | -4.89679800 | -4.36577100 | -0.79901800 |
| H | -5.29979500 | -2.32060700 | 0.98843500  |
| H | -4.01057100 | -0.75251600 | 2.39218000  |
| H | -1.26740500 | -1.70715600 | -1.52084400 |
| N | -4.28488900 | -2.34646900 | 1.05972900  |
| C | -1.10611700 | 3.60727700  | 0.17661100  |
| C | -2.30626800 | 2.98581600  | -0.20604100 |
| C | -3.53283300 | 3.61794100  | -0.08384000 |
| C | -3.55629300 | 4.91131000  | 0.43349500  |
| C | -2.37391900 | 5.54612000  | 0.81662800  |
| C | -1.14913600 | 4.90449500  | 0.69312100  |
| C | 0.07577900  | 2.78354300  | -0.01672500 |
| H | -4.45384300 | 3.12934700  | -0.38096700 |
| H | -4.50415200 | 5.42572800  | 0.53670900  |
| H | -2.40997400 | 6.55257000  | 1.21555900  |
| H | -0.23520200 | 5.40548300  | 0.99392700  |
| C | -0.07301200 | 1.52967800  | -0.53615000 |
| C | 3.51691200  | -0.40927100 | -0.75810900 |
| C | 3.53358400  | 0.91981500  | -0.30504200 |
| C | 4.74533900  | 1.47750200  | 0.10857600  |
| C | 5.90004900  | 0.70803500  | 0.05739500  |
| C | 5.86313000  | -0.60874500 | -0.40381800 |
| C | 4.66359500  | -1.18331900 | -0.81895400 |
| C | 1.13952000  | 0.84251100  | -0.69102400 |
| C | 2.22826400  | 1.55699400  | -0.28306600 |
| H | 4.78224700  | 2.49973200  | 0.47004100  |
| H | 6.84080700  | 1.13707400  | 0.38034200  |
| H | 6.77298900  | -1.19593200 | -0.43713600 |
| H | 4.63852300  | -2.20880200 | -1.16973500 |
| S | 1.75118400  | 3.12384100  | 0.29686700  |
| I | 1.56608000  | -1.06262000 | -1.26705600 |
| I | -2.00045800 | 1.02581100  | -0.96705000 |

#### TS4

Sum of electronic and thermal Free Energies=  
-996.77109 Hartree

Sum of electronic and thermal free energies + the entropy  
correction at 298.15K=-996.76079 Hartree

|   |            |             |             |
|---|------------|-------------|-------------|
| C | 3.19392500 | 0.52153400  | -0.58954800 |
| C | 6.41516200 | -0.67619600 | -0.88382900 |
| C | 5.54929000 | -0.63785000 | 0.21616500  |
| C | 6.04308500 | -0.22900900 | 1.45407800  |
| C | 7.38347900 | 0.12920500  | 1.54301200  |

|   |             |             |             |                                                           |             |             |             |
|---|-------------|-------------|-------------|-----------------------------------------------------------|-------------|-------------|-------------|
| C | 8.22475100  | 0.09693500  | 0.42053800  | H                                                         | -0.66823800 | -6.16594600 | -0.97255200 |
| C | 7.75266500  | -0.30787900 | -0.82176100 | H                                                         | 0.33361500  | -4.76481300 | -1.40603800 |
| H | 9.26288000  | 0.38928600  | 0.52457200  | H                                                         | -2.58408200 | 0.09755400  | 4.11188900  |
| H | 8.39084200  | -0.34035500 | -1.69654200 | C                                                         | -3.94575500 | 3.08212100  | 0.01759200  |
| H | 5.39618300  | -0.18938200 | 2.32361200  | C                                                         | -3.59009900 | 4.13229300  | -0.82654200 |
| H | 7.78876400  | 0.44442900  | 2.49744000  | C                                                         | -3.36318400 | -3.62158000 | 0.48886700  |
| C | 4.42713900  | -1.39274900 | -1.62621000 | C                                                         | -2.81910600 | -4.70888200 | -0.19287100 |
| N | 5.67092100  | -1.14481100 | -1.97955500 | N                                                         | -2.83627200 | 2.24004100  | 0.07797900  |
| H | 3.70357600  | -1.74488600 | -2.34800200 | N                                                         | -2.41115700 | -2.60548900 | 0.42483700  |
| H | 6.03279900  | -1.24346200 | -2.92384800 | C                                                         | -4.47174200 | 5.16876900  | -1.12280300 |
| C | 4.20905200  | -0.99869800 | -0.26817700 | C                                                         | -5.72250600 | 5.09748700  | -0.53087700 |
| H | 3.49527300  | -1.52778500 | 0.35208200  | H                                                         | -6.44491700 | 5.88005100  | -0.72787700 |
| O | 2.04299200  | 0.14007500  | -1.07404600 | C                                                         | -6.08068200 | 4.03516300  | 0.32005700  |
| H | 3.87231100  | 1.04862300  | -1.27849400 | H                                                         | -7.07137000 | 4.02315000  | 0.75778900  |
| C | 3.19236200  | 1.19037100  | 0.76401400  | C                                                         | -5.20182100 | 3.00452800  | 0.61241300  |
| C | 4.04037800  | 2.26861300  | 1.00944800  | C                                                         | -4.62744800 | -3.66871400 | 1.06978500  |
| C | 2.32669500  | 0.75383800  | 1.76888300  | C                                                         | -5.31893900 | -4.86097300 | 0.93052400  |
| C | 4.02453500  | 2.90860300  | 2.24767300  | H                                                         | -6.30769700 | -4.95068300 | 1.36353700  |
| H | 4.71442100  | 2.60786500  | 0.22844300  | C                                                         | -4.77302600 | -5.95935400 | 0.23972300  |
| C | 2.31423500  | 1.38560400  | 3.00677600  | H                                                         | -5.35405900 | -6.86961600 | 0.15645900  |
| H | 1.66124200  | -0.08197800 | 1.57647100  | C                                                         | -3.51464900 | -5.90741800 | -0.33706700 |
| C | 3.16447200  | 2.46583500  | 3.24816300  | H                                                         | -4.19120500 | 5.98238500  | -1.77988100 |
| H | 4.68421400  | 3.74937300  | 2.42992500  | H                                                         | -5.46956400 | 2.18360300  | 1.26602500  |
| H | 1.64198900  | 1.03968200  | 3.78405200  | H                                                         | -5.03991600 | -2.81854400 | 1.59895900  |
| H | 3.15276700  | 2.96021800  | 4.21287200  | H                                                         | -3.09204800 | -6.74842400 | -0.87222200 |
| C | -2.68767900 | -0.18871000 | 0.24075200  | H                                                         | -2.74090900 | -0.26958800 | -0.83937100 |
| C | -2.61088500 | 0.01784200  | 3.03263000  | <b>INT4</b>                                               |             |             |             |
| C | -2.74893500 | 1.04713700  | 0.87192500  | Sum of electronic and thermal Free Energies =             |             |             |             |
| C | -2.54056900 | -1.31439000 | 1.04073100  | -996.797456 Hartree                                       |             |             |             |
| C | -2.50709200 | -1.22953100 | 2.42740300  | Sum of electronic and thermal free energies + the entropy |             |             |             |
| C | -2.71885500 | 1.16604500  | 2.25589100  | correction at 298.15K =                                   |             |             |             |
| H | -2.39167200 | -2.13118700 | 3.01779400  | -996.78726 Hartree                                        |             |             |             |
| H | -2.76824900 | 2.14835000  | 2.71116100  | C                                                         | -2.67661100 | -2.12193000 | 0.02926800  |
| C | -1.85250500 | 2.76042800  | -0.68670400 | C                                                         | -2.21756800 | -0.85937800 | -0.33968200 |
| N | -2.28322900 | 3.89290400  | -1.24257800 | C                                                         | -3.14375100 | 0.11984800  | -0.67070300 |
| C | -1.33856500 | -3.05996700 | -0.25634900 | C                                                         | -4.49938300 | -0.20663600 | -0.60168000 |
| N | -1.55779900 | -4.31851200 | -0.63590300 | C                                                         | -4.92678600 | -1.47970100 | -0.21760700 |
| I | -0.00172800 | 1.83114800  | -0.90404800 | C                                                         | -4.00996700 | -2.47727000 | 0.10553500  |
| I | 0.32560200  | -1.87786700 | -0.63410600 | C                                                         | -0.43568200 | -2.28519400 | 0.09896300  |
| C | -1.55574100 | 4.77824200  | -2.14810500 | C                                                         | -0.71016400 | -0.87515100 | -0.29436900 |
| H | -1.52126200 | 5.77448800  | -1.70880900 | H                                                         | -2.82994100 | 1.10951900  | -0.98056500 |
| H | -2.07575600 | 4.80644200  | -3.10509800 | H                                                         | -5.23745000 | 0.54498000  | -0.85528700 |
| H | -0.54578000 | 4.40163600  | -2.28612900 | H                                                         | -5.98677600 | -1.69887800 | -0.17587800 |
| C | -0.67291900 | -5.17475800 | -1.42288500 | H                                                         | -4.31769600 | -3.47437800 | 0.39530900  |
| H | -1.04179600 | -5.22751200 | -2.44703100 | H                                                         | -1.58209400 | -3.91065600 | 0.56684500  |
|   |             |             |             | H                                                         | 0.53069500  | -2.75126400 | 0.24880000  |

|                                                           |             |             |             |   |             |             |             |
|-----------------------------------------------------------|-------------|-------------|-------------|---|-------------|-------------|-------------|
| H                                                         | -0.27768700 | -0.70145400 | -1.28675700 | H | 6.27147700  | 3.40008500  | -2.83980300 |
| N                                                         | -1.53437300 | -2.93166200 | 0.28141900  | H | 4.64012400  | 4.39126600  | -1.22701900 |
| C                                                         | -0.06920200 | 0.11980000  | 0.72448200  | H | 2.84756000  | 3.65818900  | 0.76929800  |
| H                                                         | -0.53955500 | -0.08251400 | 1.69116900  | H | 1.95928900  | 1.65301200  | 1.84589600  |
| C                                                         | -0.42585200 | 1.54763200  | 0.34560800  | H | 2.05433300  | 0.44404400  | -0.42550000 |
| C                                                         | -1.21941300 | 2.30814800  | 1.20396300  | N | 3.10857200  | 2.72043800  | 0.47284500  |
| C                                                         | 0.00524700  | 2.11267400  | -0.85677400 | C | 3.27040600  | -0.92216000 | 0.95104100  |
| C                                                         | -1.58070500 | 3.61165200  | 0.86860500  | H | 4.35122100  | -1.09037600 | 1.02699400  |
| H                                                         | -1.56455800 | 1.87412800  | 2.13702600  | C | 2.71562200  | -2.07558100 | 0.10000900  |
| C                                                         | -0.35583800 | 3.41290500  | -1.19479900 | C | 2.79980200  | -2.05637900 | -1.29780700 |
| H                                                         | 0.62211300  | 1.53497200  | -1.53707500 | C | 2.15016400  | -3.20311200 | 0.70428600  |
| C                                                         | -1.15244100 | 4.16596200  | -0.33350000 | C | 2.34787900  | -3.12722800 | -2.06482000 |
| H                                                         | -2.20048100 | 4.18954300  | 1.54491200  | H | 3.20237300  | -1.19504000 | -1.81383800 |
| H                                                         | -0.01633500 | 3.83853200  | -2.13234000 | C | 1.66859000  | -4.26485800 | -0.05962200 |
| H                                                         | -1.43527400 | 5.17816000  | -0.59903700 | H | 2.06926700  | -3.25373100 | 1.78347800  |
| C                                                         | 3.66843200  | -0.45351200 | 0.65553800  | C | 1.76544200  | -4.23503900 | -1.44968400 |
| C                                                         | 2.45668600  | -0.33646900 | -0.07556000 | H | 2.43038300  | -3.08337600 | -3.14510200 |
| C                                                         | 2.51404200  | -0.47948000 | -1.47676200 | H | 1.21837100  | -5.11792100 | 0.43562300  |
| C                                                         | 3.73349200  | -0.71907100 | -2.08489700 | H | 1.40113100  | -5.06471000 | -2.04488800 |
| C                                                         | 4.92073200  | -0.82188400 | -1.33223400 | C | 1.33331100  | -0.94444600 | 4.18069300  |
| C                                                         | 4.90356000  | -0.69212200 | 0.04401600  | C | 1.36945300  | -0.73277400 | 2.78181200  |
| C                                                         | 2.02394700  | -0.10146000 | 2.12543800  | C | 0.18446200  | -0.37002000 | 2.12171400  |
| C                                                         | 1.41213500  | -0.10613800 | 0.89837800  | C | -0.98794400 | -0.24653700 | 2.84505500  |
| H                                                         | 1.62327000  | -0.40647000 | -2.08907400 | C | -1.00117500 | -0.47585800 | 4.23672900  |
| H                                                         | 3.77822700  | -0.82900900 | -3.16227900 | C | 0.15257000  | -0.81912800 | 4.92107100  |
| H                                                         | 5.85995800  | -1.00704000 | -1.84060400 | C | 3.43667300  | -1.26344100 | 3.48428100  |
| H                                                         | 5.80882700  | -0.77179600 | 0.63514000  | C | 2.72942700  | -0.94262800 | 2.35606300  |
| H                                                         | 4.03675000  | -0.34306000 | 2.74384200  | H | 0.20725900  | -0.16510800 | 1.05711200  |
| H                                                         | 1.58465800  | 0.03417300  | 3.10307800  | H | -1.90650400 | 0.03657400  | 2.34124500  |
| N                                                         | 3.37064400  | -0.30074400 | 1.98506900  | H | -1.93221800 | -0.37336800 | 4.78188600  |
| <b>Cat7-TS5</b>                                           |             |             |             | H | 0.14592000  | -0.98638900 | 5.99207900  |
| Sum of electronic and thermal Free Energies=              |             |             |             | H | 2.89504300  | -1.46197000 | 5.52649900  |
| -2316.346007 Hartree                                      |             |             |             | H | 4.48385900  | -1.50790600 | 3.58779500  |
| Sum of electronic and thermal free energies + the entropy |             |             |             | N | 2.60719600  | -1.26522700 | 4.57791900  |
| correction at 298.15K=                                    |             |             |             | O | 0.84852500  | 0.47623800  | -1.26764800 |
| -2316.33602 Hartree                                       |             |             |             | H | 1.19220200  | 0.55322400  | -2.17114100 |
| C                                                         | 4.01656600  | 2.43484900  | -0.55695800 | C | -3.28284800 | 2.92514500  | 0.10625000  |
| C                                                         | 4.10869500  | 1.04047000  | -0.65577200 | C | -2.12800900 | 3.67425200  | -0.15820600 |
| C                                                         | 5.04707400  | 0.49804100  | -1.53516200 | C | -2.07772600 | 5.04932400  | -0.00757700 |
| C                                                         | 5.81538300  | 1.36496800  | -2.30385700 | C | -3.23430900 | 5.69510900  | 0.42295900  |
| C                                                         | 5.66159000  | 2.75569800  | -2.21823700 | C | -4.39715600 | 4.97163400  | 0.69173100  |
| C                                                         | 4.75664800  | 3.31923500  | -1.33012500 | C | -4.43170000 | 3.59285900  | 0.53689700  |
| C                                                         | 2.65561700  | 1.61440600  | 1.01796500  | C | -3.13243900 | 1.49772000  | -0.10992500 |
| C                                                         | 3.10919500  | 0.46156300  | 0.28295200  | H | -1.17630900 | 5.61347100  | -0.21688900 |
| H                                                         | 5.20005900  | -0.57202400 | -1.60557200 | H | -3.22513200 | 6.77093300  | 0.54906600  |
| H                                                         | 6.55512400  | 0.95587200  | -2.98185500 |   |             |             |             |

|   |             |             |             |   |             |             |             |
|---|-------------|-------------|-------------|---|-------------|-------------|-------------|
| H | -5.28659700 | 5.49180000  | 1.02572700  | C | -0.55473000 | 3.00359800  | -1.61368400 |
| H | -5.34022800 | 3.03917300  | 0.74830700  | H | -0.89537500 | 0.88230300  | -1.57177600 |
| C | -1.92916600 | 1.00099600  | -0.53161000 | C | -0.13187700 | 4.12264500  | -0.90363600 |
| C | -2.15208700 | -3.07715800 | -0.98301300 | H | 0.62033800  | 4.84309600  | 0.98107400  |
| C | -3.30244600 | -2.40160500 | -0.54862600 | H | -0.89067100 | 3.10594000  | -2.63967200 |
| C | -4.45076000 | -3.15182600 | -0.28384400 | H | -0.13631200 | 5.10074100  | -1.37111500 |
| C | -4.41972700 | -4.52836800 | -0.45848900 | C | 3.50290100  | -0.92113700 | 0.61448200  |
| C | -3.26002000 | -5.17243300 | -0.89226400 | C | 2.27621800  | -0.53444200 | 0.01830600  |
| C | -2.10080000 | -4.44818300 | -1.15965300 | C | 2.18584400  | -0.50430300 | -1.38515000 |
| C | -1.93749600 | -0.39363600 | -0.71368900 | C | 3.29637300  | -0.84666500 | -2.13710100 |
| C | -3.14628300 | -0.96472500 | -0.42072500 | C | 4.50697500  | -1.22556300 | -1.52020100 |
| H | -5.35683700 | -2.66221300 | 0.05631000  | C | 4.62701000  | -1.26965800 | -0.14230200 |
| H | -5.31011500 | -5.10986200 | -0.25297100 | C | 2.04881700  | -0.47622000 | 2.25617500  |
| H | -3.25394800 | -6.24763100 | -1.02319300 | C | 1.35688200  | -0.25640400 | 1.09507100  |
| H | -1.19753500 | -4.94618500 | -1.49248800 | H | 1.25795600  | -0.22322900 | -1.87052900 |
| S | -4.30068500 | 0.23048400  | 0.07392600  | H | 3.23808700  | -0.82677900 | -3.21939900 |
| I | -0.53487100 | -1.77007200 | -1.28314400 | H | 5.35834100  | -1.48874800 | -2.13758400 |
| I | -0.51158300 | 2.46198000  | -0.76770700 | H | 5.55369300  | -1.56291300 | 0.33808300  |

**Product**

Sum of electronic and thermal Free Energies =  
-996.387958 Hartree

Sum of electronic and thermal free energies + the entropy  
correction at 298.15K = -996.37777 Hartree

|   |             |             |             |
|---|-------------|-------------|-------------|
| C | -2.92897400 | -1.83059500 | -0.30326200 |
| C | -2.43474200 | -0.65369700 | 0.31008500  |
| C | -3.34009300 | 0.34985000  | 0.69379000  |
| C | -4.69123900 | 0.15515400  | 0.46161700  |
| C | -5.16160100 | -1.02465400 | -0.15166300 |
| C | -4.29290500 | -2.03026800 | -0.54138900 |
| C | -0.69986300 | -2.00647800 | -0.15060300 |
| C | -1.00234700 | -0.78792100 | 0.39619200  |
| H | -2.98488500 | 1.26150100  | 1.16358700  |
| H | -5.40261400 | 0.91963300  | 0.75245700  |
| H | -6.22541000 | -1.14614300 | -0.32161100 |
| H | -4.65170800 | -2.93822000 | -1.01285500 |
| H | -1.88843100 | -3.54617500 | -1.00418100 |
| H | 0.25816200  | -2.48901000 | -0.27410800 |
| N | -1.84987200 | -2.63384700 | -0.57248700 |
| C | -0.06900200 | 0.22665000  | 1.00423000  |
| H | -0.40240300 | 0.40173900  | 2.03453400  |
| C | -0.12517500 | 1.58966500  | 0.30685300  |
| C | 0.29664500  | 2.72059900  | 1.01204300  |
| C | -0.55504800 | 1.74609200  | -1.01037500 |
| C | 0.29383400  | 3.97703300  | 0.41607000  |
| H | 0.63090000  | 2.60972900  | 2.03983900  |
